# Supplementary material for: Phycocyanin Ameliorates Colitis-Associated Colorectal Cancer by Regulating the Gut Microbiota and the IL-17 Signaling Pathway
Source: Mar Drugs. 2022 Apr 9;20(4):260. doi: 10.3390/md20040260 (PMC9030732; doi:10.3390/md20040260)
Supplement: Supplementary file 1 [file marinedrugs-20-00260-s001.zip]

Archive with 5 entries (5 files):
- marinedrugs-1660453-supplementary.pdf
- Table S1. Data of the a┴-diversity index analysis.xlsx
- Table S2. AD-vs-PC-DEGs.xls
- Table S3. Spearman-V2.xlsx
- Table S4. Primers list.xlsx
