# Supplementary material for: Phycocyanin Ameliorates Colitis-Associated Colorectal Cancer by Regulating the Gut Microbiota and the IL-17 Signaling Pathway
Source: Mar Drugs. 2022 Apr 9;20(4):260. doi: 10.3390/md20040260 (PMC9030732; doi:10.3390/md20040260)
Supplement: Supplementary file 1 [file marinedrugs-20-00260-s001.zip › Table S1. Data of the a┴-diversity index analysis.xlsx]

## Sheet: sheet 1
index	sobs	shannon	simpson	chao	ace	goods_coverage	pielou	pd
AD1	370	4.26509	0.777605	402.229	400.996	0.999434	0.49993	32.2993
AD2	342	3.17921	0.679784	386.386	392.726	0.999367	0.377675	33.5017
AD3	362	4.53467	0.855051	390.667	391.431	0.999487	0.5335	31.5373
AD5	325	4.50544	0.876966	349.118	349.242	0.999519	0.539942	29.4441
AD4	366	4.79751	0.886108	392.366	399.933	0.999498	0.563372	32.4645
Cont2	380	4.99803	0.899157	417.243	416.544	0.999316	0.58321	34.7576
Cont3	340	3.51825	0.702848	379.9	384.211	0.999407	0.418371	30.1273
Cont4	386	5.19812	0.899011	401.75	404.516	0.99953	0.604963	32.728
Cont5	379	5.20861	0.942122	407.219	406.218	0.999529	0.608053	32.7331
Cont1	399	5.3308	0.94763	433.438	439.342	0.999242	0.616973	35.922
PCH1	291	2.75849	0.569699	328.935	329.316	0.999473	0.337023	26.6659
PCH2	325	3.25171	0.674358	402.656	388.616	0.999206	0.389692	30.5781
PCH3	326	2.9773	0.604289	357.889	348.373	0.999602	0.356617	29.069
PCH4	289	2.36211	0.543293	335.406	332.393	0.999467	0.288946	26.3899
PCH5	327	2.23297	0.447272	362.333	364.48	0.999492	0.267321	29.8109
PCL1	362	4.16702	0.831635	381.167	391.771	0.999509	0.490246	32.4878
PCL2	321	2.94605	0.598391	359.936	373.84	0.999387	0.353819	30.6493
PCL3	327	3.45951	0.721462	359.047	365.179	0.999477	0.414157	31.153
PCL4	325	3.20332	0.659117	370.818	382.266	0.999261	0.383894	29.9957
PCL5	277	3.72353	0.843703	313.833	314.897	0.999444	0.458917	27.7865
