# Supplementary material for: Phycocyanin Ameliorates Colitis-Associated Colorectal Cancer by Regulating the Gut Microbiota and the IL-17 Signaling Pathway
Source: Mar Drugs. 2022 Apr 9;20(4):260. doi: 10.3390/md20040260 (PMC9030732; doi:10.3390/md20040260)
Supplement: Supplementary file 1 [file marinedrugs-20-00260-s001.zip › Table S2. AD-vs-PC-DEGs.xls]

id	AD1_count	AD3_count	AD5_count	PC3_count	PC4_count	PC5_count	AD1_fpkm	AD3_fpkm	AD5_fpkm	PC3_fpkm	PC4_fpkm	PC5_fpkm	AD_mean	PC_mean	log2(fc)	PValue	FDR	Symbol	KEGG_A_class	KEGG_B_class	K_ID
ENSMUSG00000050578	981	942	1161	150	73	84	18.03	16.87	21.09	2.74	1.42	1.64	18.6633333333333	1.93333333333333	-3.27104437469806	4.96567891989846e-33	8.97049896879657e-29	Mmp13	Organismal Systems;Organismal Systems;Organismal Systems	Endocrine system;Endocrine system;Immune system	K07994;K07994;K07994
ENSMUSG00000047562	2295	2097	3825	381	208	211	65.47	58.28	107.85	10.81	6.28	6.38	77.2	7.82333333333333	-3.30274550635343	1.08501018169604e-26	9.80035446616951e-23	Mmp10	-	-	-
ENSMUSG00000058427	226	263	216	45	25	21	9.70	10.78	9.32	1.92	1.17	0.94	9.93333333333333	1.34333333333333	-2.88646058682156	2.78124123868991e-18	1.67477076589778e-14	Cxcl2	Environmental Information Processing;Environmental Information Processing;Human Diseases;Human Diseases;Organismal Systems;Human Diseases;Organismal Systems;Environmental Information Processing;Organismal Systems;Environmental Information Processing;Human Diseases;Human Diseases	Signaling molecules and interaction;Signal transduction;Immune diseases;Infectious diseases;Immune system;Infectious diseases;Immune system;Signal transduction;Immune system;Signaling molecules and interaction;Infectious diseases;Infectious diseases	K05505;K05505;K05505;K05505;K05505;K05505;K05505;K05505;K05505;K05505;K05505;K05505
ENSMUSG00000027398	618	614	669	179	101	94	22.39	21.67	23.95	6.45	3.87	3.61	22.67	4.64333333333333	-2.28755163386069	1.00412477797941e-17	4.5348785285495e-14	Il1b	Human Diseases;Human Diseases;Human Diseases;Environmental Information Processing;Human Diseases;Environmental Information Processing;Environmental Information Processing;Human Diseases;Human Diseases;Human Diseases;Human Diseases;Human Diseases;Organismal Systems;Organismal Systems;Human Diseases;Human Diseases;Human Diseases;Cellular Processes;Human Diseases;Human Diseases;Human Diseases;Human …	Infectious diseases;Infectious diseases;Neurodegenerative diseases;Signaling molecules and interaction;Infectious diseases;Signal transduction;Signal transduction;Immune diseases;Infectious diseases;Infectious diseases;Infectious diseases;Infectious diseases;Immune system;Immune system;Infectious diseases;Infectious diseases;Infectious diseases;Cell growth and death;Infectious disease: bacterial;…	K04519;K04519;K04519;K04519;K04519;K04519;K04519;K04519;K04519;K04519;K04519;K04519;K04519;K04519;K04519;K04519;K04519;K04519;K04519;K04519;K04519;K04519;K04519;K04519;K04519;K04519;K04519;K04519;K04519;K04519;K04519;K04519;K04519;K04519;K04519;K04519;K04519;K04519;K04519;K04519
ENSMUSG00000004371	206	114	189	19	12	9	6.09	3.54	5.29	0.48	0.37	0.47	4.97333333333333	0.44	-3.49863770089678	3.0828167025415e-16	1.11382167462824e-12	Il11	Environmental Information Processing;Human Diseases;Organismal Systems;Environmental Information Processing	Signaling molecules and interaction;Immune diseases;Immune system;Signal transduction	K05417;K05417;K05417;K05417
ENSMUSG00000053113	1912	2097	1607	783	515	535	36.80	39.32	30.57	15.00	10.49	10.91	35.5633333333333	12.1333333333333	-1.5514146038825	6.56509199366732e-13	1.97663978109334e-09	Socs3	Human Diseases;Human Diseases;Environmental Information Processing;Human Diseases;Human Diseases;Genetic Information Processing;Organismal Systems;Organismal Systems;Environmental Information Processing;Organismal Systems;Human Diseases;Organismal Systems;Organismal Systems;Human Diseases	Infectious diseases;Infectious diseases;Signal transduction;Infectious diseases;Endocrine and metabolic diseases;Folding, sorting and degradation;Endocrine system;Development;Signal transduction;Endocrine system;Endocrine and metabolic diseases;Endocrine system;Endocrine system;Endocrine and metabolic diseases	K04696;K04696;K04696;K04696;K04696;K04696;K04696;K04696;K04696;K04696;K04696;K04696;K04696;K04696
ENSMUSG00000006731	2107	1937	1672	3486	4158	4008	43.26	38.72	33.89	71.19	90.33	87.20	38.6233333333333	82.9066666666667	1.10201543649714	1.01679883819348e-12	2.6240672874236e-09	B4galnt1	Metabolism;Metabolism	Global and overview maps;Glycan biosynthesis and metabolism	K00725;K00725
ENSMUSG00000074004	533	383	428	1011	1659	1271	11.04	7.73	8.76	20.84	36.38	27.91	9.17666666666667	28.3766666666667	1.62866302049947	4.87121704994252e-12	1.09998170009015e-08	B3gnt6	Metabolism;Metabolism	Global and overview maps;Glycan biosynthesis and metabolism	K00739;K00739
ENSMUSG00000043613	311	277	210	70	71	74	8.48	7.36	5.67	1.90	2.05	2.14	7.17	2.03	-1.82049339151673	4.24909082107865e-11	8.52886952030953e-08	Mmp3	Human Diseases;Human Diseases;Environmental Information Processing;Human Diseases;Organismal Systems	Cancers;Immune diseases;Signal transduction;Cancers;Immune system	K01394;K01394;K01394;K01394;K01394
ENSMUSG00000031722	1086	981	1574	382	155	185	39.66	34.91	56.82	13.88	5.99	7.16	43.7966666666667	9.01	-2.28122206035379	6.27942069893752e-11	1.05271185026127e-07	Hp	-	-	-
ENSMUSG00000024810	531	1092	688	232	141	166	10.71	20.55	13.13	4.46	2.89	3.40	14.7966666666667	3.58333333333333	-2.04589804884828	8.70190259334317e-11	1.30999891957287e-07	Il33	Environmental Information Processing;Human Diseases;Cellular Processes;Organismal Systems	Signaling molecules and interaction;Infectious diseases;Cell growth and death;Immune system	K12967;K12967;K12967;K12967
ENSMUSG00000001739	2413	1689	1548	4010	6346	5377	63.34	43.37	40.19	105.15	177.09	150.41	48.9666666666667	144.216666666667	1.55836600676976	1.12755281590318e-10	1.56686473994546e-07	Cldn15	Human Diseases;Environmental Information Processing;Cellular Processes;Human Diseases;Organismal Systems	Infectious diseases;Signaling molecules and interaction;Cellular community - eukaryotes;Infectious diseases;Immune system	K06087;K06087;K06087;K06087;K06087
ENSMUSG00000029379	69	140	83	10	7	13	3.34	6.59	3.97	0.48	0.36	0.67	4.63333333333333	0.503333333333333	-3.20246442828579	2.0156767894975e-10	2.42754674681815e-07	Cxcl3	Environmental Information Processing;Environmental Information Processing;Human Diseases;Human Diseases;Organismal Systems;Human Diseases;Organismal Systems;Environmental Information Processing;Organismal Systems;Environmental Information Processing;Human Diseases;Human Diseases	Signaling molecules and interaction;Signal transduction;Immune diseases;Infectious diseases;Immune system;Infectious diseases;Immune system;Signal transduction;Immune system;Signaling molecules and interaction;Infectious diseases;Infectious diseases	K05505;K05505;K05505;K05505;K05505;K05505;K05505;K05505;K05505;K05505;K05505;K05505
ENSMUSG00000042734	299	342	445	134	99	112	4.93	5.12	7.97	2.38	1.94	2.17	6.00666666666667	2.16333333333333	-1.4733086278144	2.71793685001117e-10	2.84237458504549e-07	Ttc9	-	-	-
ENSMUSG00000032487	223	235	169	60	50	31	2.46	2.53	1.84	0.66	0.58	0.36	2.27666666666667	0.533333333333333	-2.09381367340273	2.74669507165476e-10	2.84237458504549e-07	Ptgs2	Metabolism;Human Diseases;Human Diseases;Human Diseases;Environmental Information Processing;Human Diseases;Human Diseases;Human Diseases;Human Diseases;Organismal Systems;Organismal Systems;Organismal Systems;Environmental Information Processing;Organismal Systems;Human Diseases;Organismal Systems;Human Diseases;Metabolism;Organismal Systems;Environmental Information Processing;Organismal Systems	Global and overview maps;Cancers;Infectious diseases;Neurodegenerative diseases;Signal transduction;Infectious diseases;Infectious diseases;Infectious diseases;Cancers;Endocrine system;Nervous system;Nervous system;Signal transduction;Immune system;Cancers;Immune system;Cancers;Lipid metabolism;Endocrine system;Signal transduction;Endocrine system	K11987;K11987;K11987;K11987;K11987;K11987;K11987;K11987;K11987;K11987;K11987;K11987;K11987;K11987;K11987;K11987;K11987;K11987;K11987;K11987;K11987
ENSMUSG00000046460	64	51	44	144	172	175	1.03	0.83	0.70	2.36	2.94	3.11	0.853333333333333	2.80333333333333	1.71596199025514	2.83214738615106e-10	2.84237458504549e-07	Sh2d7	-	-	-
ENSMUSG00000050201	37	102	99	2	1	5	0.82	2.20	2.17	0.04	0.02	0.12	1.73	0.06	-4.84966572691557	3.12496167558744e-10	2.97118066681512e-07	Otop2	-	-	-
ENSMUSG00000004366	90	125	99	243	588	405	6.13	8.30	6.67	16.47	42.41	29.24	7.03333333333333	29.3733333333333	2.06222649610633	4.39603391671154e-10	3.97071763526969e-07	Sst	Environmental Information Processing;Environmental Information Processing;Organismal Systems;Organismal Systems	Signaling molecules and interaction;Signal transduction;Endocrine system;Digestive system	K05237;K05237;K05237;K05237
ENSMUSG00000031530	1142	1629	2200	551	326	499	20.47	28.45	38.99	9.83	6.19	9.48	29.3033333333333	8.5	-1.78553003807778	1.02542113084797e-09	8.82106320417556e-07	Dusp4	Environmental Information Processing;Organismal Systems	Signal transduction;Development and regeneration	K04459;K04459
ENSMUSG00000055210	483	367	316	813	1266	962	9.15	6.78	5.92	15.33	25.40	19.32	7.28333333333333	20.0166666666667	1.45853096620504	1.39892641064663e-09	1.0987654612318e-06	Foxd2	-	-	-
ENSMUSG00000026069	1574	1128	2102	493	161	264	27.77	19.21	36.40	8.46	2.96	4.98	27.7933333333333	5.46666666666667	-2.34600555730294	1.85778640685173e-09	1.39837130999069e-06	Il1rl1	Environmental Information Processing	Signaling molecules and interaction	K05171
ENSMUSG00000037579	295	186	198	483	688	781	3.92	2.41	2.60	6.38	9.67	10.99	2.97666666666667	9.01333333333333	1.59836307116096	3.32642248255893e-09	2.40367288589708e-06	Kcnh3	-	-	-
ENSMUSG00000031538	2350	5642	8190	1215	695	1124	45.72	106.93	157.49	23.52	14.31	23.17	103.38	20.3333333333333	-2.34603846032965	3.89279262771683e-09	2.70474226229633e-06	Plat	Human Diseases;Human Diseases;Environmental Information Processing;Human Diseases;Organismal Systems	Cancers;Cardiovascular diseases;Signal transduction;Cancers;Immune system	K01343;K01343;K01343;K01343;K01343
ENSMUSG00000052353	518	446	627	183	63	89	3.58	3.00	4.28	1.26	0.46	0.65	3.62	0.79	-2.1960651389061	5.08060114455141e-09	3.39929850653041e-06	Cemip	-	-	-
ENSMUSG00000026773	903	1540	1054	482	309	363	9.53	15.79	10.98	5.14	3.52	4.04	12.1	4.23333333333333	-1.51514105122359	5.7160831602926e-09	3.68789436752449e-06	Pfkfb3	Metabolism;Environmental Information Processing;Environmental Information Processing;Metabolism	Global and overview maps;Signal transduction;Signal transduction;Carbohydrate metabolism	K01103;K01103;K01103;K01103
ENSMUSG00000094840	725	555	361	1282	1461	1877	18.93	14.15	9.34	33.31	40.43	51.99	14.14	41.91	1.56751240132122	7.61759310163362e-09	4.74523515106936e-06	Muc3a	-	-	-
ENSMUSG00000038560	150	269	239	71	41	46	2.04	3.57	3.22	0.98	0.60	0.67	2.94333333333333	0.75	-1.97248843643143	9.5292437818566e-09	5.73819296397465e-06	Sp6	-	-	-
ENSMUSG00000001334	58	45	35	136	186	129	1.03	0.78	0.62	2.41	3.50	2.43	0.81	2.78	1.77909106983888	1.06214963923243e-08	6.189591365398e-06	Fndc5	-	-	-
ENSMUSG00000056071	364	487	1140	129	25	59	34.86	45.41	107.93	12.28	2.54	5.99	62.7333333333333	6.93666666666667	-3.17691775788056	1.16230022886993e-08	6.53216736025493e-06	S100a9	Organismal Systems	Immune system	K21128
ENSMUSG00000049866	941	1157	1457	471	282	446	11.56	13.85	17.70	5.76	3.67	5.81	14.37	5.08	-1.50015965968517	1.19325503951515e-08	6.53216736025493e-06	Arl4c	-	-	-
ENSMUSG00000030022	312	256	307	121	86	66	2.02	1.64	2.02	0.82	0.63	0.49	1.89333333333333	0.646666666666667	-1.54983427731755	1.65797066532978e-08	8.55749716262358e-06	Adamts9	-	-	-
ENSMUSG00000028031	477	559	1031	209	89	149	6.32	7.22	13.51	2.76	1.25	2.09	9.01666666666667	2.03333333333333	-2.14874744626393	2.28797277929138e-08	1.1481174516083e-05	Dkk2	Human Diseases;Environmental Information Processing	Neurodegenerative diseases;Signal transduction	K02165;K02165
ENSMUSG00000040026	685	1002	1487	392	219	234	60.23	86.16	129.84	34.52	20.52	21.87	92.0766666666667	25.6366666666667	-1.84462691447318	3.03021120427248e-08	1.47948014608601e-05	Saa3	-	-	-
ENSMUSG00000118219	51	74	125	14	6	6	0.48	0.67	1.15	0.13	0.06	0.06	0.766666666666667	0.0833333333333333	-3.20163386116965	3.38872507990375e-08	1.61098206759109e-05	Gm29695	-	-	-
ENSMUSG00000007682	83	56	45	9	5	5	0.70	0.46	0.38	0.08	0.04	0.04	0.513333333333333	0.0533333333333333	-3.2667865406949	4.00937589337066e-08	1.85716347471131e-05	Dio2	-	-	-
ENSMUSG00000040717	519	610	828	282	245	196	3.21	3.53	4.92	1.72	1.54	1.23	3.88666666666667	1.49666666666667	-1.37678043845935	4.79417913804132e-08	2.16517115321791e-05	Il17rd	-	-	-
ENSMUSG00000006403	212	215	243	82	43	29	2.37	2.35	2.69	0.91	0.51	0.34	2.47	0.586666666666667	-2.07389811366854	6.01153376344791e-08	2.58567517706396e-05	Adamts4	-	-	-
ENSMUSG00000037126	200	249	202	355	779	713	4.75	5.75	4.65	8.42	20.06	18.21	5.05	15.5633333333333	1.62379579488187	8.84555780224372e-08	3.63170458403484e-05	Psd	Cellular Processes;Organismal Systems	Transport and catabolism;Development and regeneration	K12494;K12494
ENSMUSG00000029231	1867	1636	2445	972	814	671	14.30	12.72	18.70	7.29	6.75	5.51	15.24	6.51666666666667	-1.22565679601976	1.01201013846638e-07	3.88977939391387e-05	Pdgfra	Human Diseases;Environmental Information Processing;Environmental Information Processing;Environmental Information Processing;Environmental Information Processing;Environmental Information Processing;Environmental Information Processing;Cellular Processes;Human Diseases;Cellular Processes;Cellular Processes;Environmental Information Processing;Human Diseases;Human Diseases;Human Diseases;Cellular…	Cancers;Signal transduction;Signal transduction;Signal transduction;Signal transduction;Signal transduction;Signal transduction;Transport and catabolism;Infectious diseases;Cell motility;Cellular community - eukaryotes;Signal transduction;Cancers;Cancers;Cancers;Cellular community - eukaryotes;Drug resistance;Cancers;Cancers;Cancers	K04363;K04363;K04363;K04363;K04363;K04363;K04363;K04363;K04363;K04363;K04363;K04363;K04363;K04363;K04363;K04363;K04363;K04363;K04363;K04363
ENSMUSG00000029108	630	633	828	360	294	289	5.64	5.54	7.08	3.25	2.39	2.57	6.08666666666667	2.73666666666667	-1.15323263820642	1.32446474814616e-07	4.69146189710988e-05	Pcdh7	-	-	-
ENSMUSG00000003541	1444	1309	1171	711	510	593	62.72	55.39	50.27	30.73	23.45	27.29	56.1266666666667	27.1566666666667	-1.04737997347186	1.36751528171672e-07	4.7508006854255e-05	Ier3	-	-	-
ENSMUSG00000056632	53	171	117	21	8	15	0.54	1.42	1.00	0.25	0.10	0.22	0.986666666666667	0.19	-2.37656335146421	2.70357580595231e-07	9.02456510798086e-05	Dsg3	-	-	-
ENSMUSG00000004709	285	384	430	163	81	98	4.00	5.11	5.68	2.30	1.16	1.54	4.93	1.66666666666667	-1.56462205243698	2.91391796772439e-07	9.32538164548743e-05	Cd244a	Organismal Systems	Immune system	K06582
ENSMUSG00000001270	1644	1392	1435	2176	4160	3633	54.86	45.26	47.33	72.25	146.95	128.48	49.15	115.893333333333	1.23753425723218	2.94241214388477e-07	9.32538164548743e-05	Ckb	Metabolism;Metabolism	Global and overview maps;Amino acid metabolism	K00933;K00933
ENSMUSG00000042010	508	361	288	832	761	839	2.93	2.02	2.02	5.36	4.96	5.69	2.32333333333333	5.33666666666667	1.19974274664784	3.42486268198425e-07	0.000106672662672492	Acacb	Metabolism;Organismal Systems;Environmental Information Processing;Human Diseases;Organismal Systems;Organismal Systems;Metabolism;Metabolism;Metabolism	Global and overview maps;Endocrine system;Signal transduction;Endocrine and metabolic diseases;Endocrine system;Endocrine system;Carbohydrate metabolism;Carbohydrate metabolism;Lipid metabolism	K01946;K01946;K01946;K01946;K01946;K01946;K01946;K01946;K01946
ENSMUSG00000027562	9006	5670	6156	12861	15167	12609	248.57	154.36	168.57	355.40	446.93	374.70	190.5	392.343333333333	1.0423256885314	3.63409308080573e-07	0.000111271002550433	Car2	Metabolism;Organismal Systems;Organismal Systems;Organismal Systems;Organismal Systems;Organismal Systems;Metabolism	Global and overview maps;Digestive system;Digestive system;Digestive system;Excretory system;Excretory system;Energy metabolism	K18245;K18245;K18245;K18245;K18245;K18245;K18245
ENSMUSG00000051149	540	989	841	339	283	296	5.38	9.60	8.28	3.37	2.98	3.13	7.75333333333333	3.16	-1.29489213257496	4.20849253777522e-07	0.000122351420879474	Adnp	-	-	-
ENSMUSG00000006777	1775	3263	2920	1210	602	770	55.71	99.78	90.59	37.79	20.00	25.61	82.0266666666667	27.8	-1.5610081196298	4.27663798576165e-07	0.000122351420879474	Krt23	Human Diseases;Organismal Systems	Infectious diseases;Endocrine system	K07604;K07604
ENSMUSG00000027797	214	205	153	348	446	349	2.10	1.62	1.39	3.37	4.19	3.21	1.70333333333333	3.59	1.07562305360659	4.29278384257953e-07	0.000122351420879474	Dclk1	-	-	-
ENSMUSG00000028464	3896	3829	3420	5192	12443	10833	163.50	156.69	142.19	217.28	554.94	483.24	154.126666666667	418.486666666667	1.44106516258032	4.43927488127622e-07	0.000122351420879474	Tpm2	-	-	-
ENSMUSG00000030483	150	95	346	32	6	25	3.85	2.37	8.77	0.82	0.16	0.68	4.99666666666667	0.553333333333333	-3.17474523660094	4.65330996689954e-07	0.000123620653753	Cyp2b10	Metabolism;Human Diseases;Metabolism;Metabolism;Metabolism	Global and overview maps;Cancers;Lipid metabolism;Metabolism of cofactors and vitamins;Lipid metabolism	K07412;K07412;K07412;K07412;K07412
ENSMUSG00000030711	1940	1551	906	3339	4635	3057	77.40	58.59	35.12	132.43	195.26	127.59	57.0366666666667	151.76	1.41183000839799	4.8247791488975e-07	0.000126318312064976	Sult1a1	Human Diseases	Cancers	K01014
ENSMUSG00000029646	2269	1516	2095	3136	3988	4664	49.30	32.09	44.99	67.79	91.72	107.38	42.1266666666667	88.9633333333333	1.07847707977861	5.25709010189552e-07	0.000135060992879131	Cdx2	Human Diseases	Cancers	K22234
ENSMUSG00000094117	105	165	294	8	10	40	14.37	22.00	39.76	1.14	1.45	5.80	25.3766666666667	2.79666666666667	-3.18172236242441	5.83335241367078e-07	0.000144355495004058	Igkv3-12	-	-	-
ENSMUSG00000022126	92	179	214	44	18	11	1.72	3.27	3.96	0.82	0.36	0.22	2.98333333333333	0.466666666666667	-2.67646085520665	6.41339347451395e-07	0.000148535837329608	Acod1	Metabolism;Metabolism	Global and overview maps;Carbohydrate metabolism	K17724;K17724
ENSMUSG00000001349	5852	6557	6278	8414	18670	17181	202.13	211.66	211.28	269.36	661.21	578.46	208.356666666667	503.01	1.27153181970541	6.52016959076896e-07	0.00014909729576866	Cnn1	-	-	-
ENSMUSG00000024053	242	234	286	121	102	82	3.02	4.02	4.43	2.26	1.35	1.16	3.82333333333333	1.59	-1.26580422001031	6.95088832299999e-07	0.000155021972290117	Emilin2	-	-	-
ENSMUSG00000028307	1395	1148	823	2059	2365	2060	33.99	27.25	19.82	49.92	61.00	53.19	27.02	54.7033333333333	1.01760107127836	7.60628612886349e-07	0.000166554223877914	Aldob	Metabolism;Metabolism;Environmental Information Processing;Metabolism;Metabolism;Metabolism;Metabolism	Global and overview maps;Global and overview maps;Signal transduction;Global and overview maps;Carbohydrate metabolism;Carbohydrate metabolism;Carbohydrate metabolism	K01623;K01623;K01623;K01623;K01623;K01623;K01623
ENSMUSG00000029371	1066	1926	1993	566	117	278	33.25	58.52	61.44	17.56	3.86	9.19	51.07	10.2033333333333	-2.32343551490659	7.6523667765662e-07	0.000166554223877914	Cxcl5	Environmental Information Processing;Human Diseases;Organismal Systems;Environmental Information Processing;Organismal Systems;Environmental Information Processing;Human Diseases	Signaling molecules and interaction;Immune diseases;Immune system;Signal transduction;Immune system;Signaling molecules and interaction;Infectious diseases	K05506;K05506;K05506;K05506;K05506;K05506;K05506
ENSMUSG00000056293	4164	5277	3064	6605	10111	12866	96.78	119.55	70.45	152.99	249.90	318.13	95.5933333333333	240.34	1.33009486400794	7.97569925550064e-07	0.000171525008393594	Gsdmc2	-	-	-
ENSMUSG00000015647	3134	3120	3738	1934	1238	1563	13.52	13.11	15.94	8.30	5.65	7.14	14.19	7.03	-1.01327799498802	8.73081532345801e-07	0.000185555504492081	Lama5	Human Diseases;Environmental Information Processing;Human Diseases;Human Diseases;Cellular Processes;Human Diseases;Human Diseases;Environmental Information Processing	Cancers;Signal transduction;Infectious diseases;Infectious diseases;Cellular community - eukaryotes;Infectious diseases;Cancers;Signaling molecules and interaction	K06240;K06240;K06240;K06240;K06240;K06240;K06240;K06240
ENSMUSG00000030399	105	108	57	163	442	393	2.71	2.57	1.59	4.38	12.90	11.15	2.29	9.47666666666667	2.04903209485943	8.99281824648337e-07	0.000187201299518101	Ckm	Metabolism;Metabolism	Global and overview maps;Amino acid metabolism	K00933;K00933
ENSMUSG00000024349	2001	3090	2500	1332	741	923	49.54	74.71	60.45	32.06	17.33	25.20	61.5666666666667	24.8633333333333	-1.30812973444636	9.17475211464123e-07	0.000187201299518101	Sting1	Human Diseases;Human Diseases;Human Diseases;Human Diseases;Organismal Systems;Organismal Systems;Organismal Systems	Infectious diseases;Infectious disease: viral;Infectious diseases;Infectious diseases;Immune system;Immune system;Immune system	K12654;K12654;K12654;K12654;K12654;K12654;K12654
ENSMUSG00000029545	3771	2833	2369	4924	6336	5849	99.06	72.50	61.51	128.70	176.18	162.82	77.69	155.9	1.00482011127674	9.18674684528806e-07	0.000187201299518101	Acads	Metabolism;Metabolism;Metabolism;Metabolism;Metabolism;Metabolism;Metabolism;Metabolism	Global and overview maps;Global and overview maps;Global and overview maps;Amino acid metabolism;Lipid metabolism;Carbohydrate metabolism;Metabolism of other amino acids;Carbohydrate metabolism	K00248;K00248;K00248;K00248;K00248;K00248;K00248;K00248
ENSMUSG00000058755	71	55	92	19	9	12	1.54	1.16	1.97	0.41	0.21	0.27	1.55666666666667	0.296666666666667	-2.39154530874327	1.03848899216873e-06	0.000203916343951392	Osm	Environmental Information Processing;Environmental Information Processing;Environmental Information Processing	Signal transduction;Signaling molecules and interaction;Signal transduction	K05418;K05418;K05418
ENSMUSG00000027346	1325	1918	1224	709	342	502	17.90	25.82	16.47	9.57	4.93	7.23	20.0633333333333	7.24333333333333	-1.46983564222004	1.11329288292659e-06	0.000216254149785686	Gpcpd1	Metabolism;Human Diseases	Lipid metabolism;Cancers	K18695;K18695
ENSMUSG00000023247	7636	5440	4018	11783	12250	10708	631.49	438.29	328.44	969.54	1072.36	938.43	466.073333333333	993.443333333333	1.09188070696789	1.17116943756587e-06	0.000222732223017865	Guca2a	-	-	-
ENSMUSG00000072437	270	407	447	138	99	157	3.38	4.96	5.53	1.72	1.31	2.08	4.62333333333333	1.70333333333333	-1.44057259138598	1.17130147725974e-06	0.000222732223017865	Nanos1	-	-	-
ENSMUSG00000059430	7547	7473	7363	9759	23507	22699	279.85	269.13	278.14	357.89	917.04	889.80	275.706666666667	721.576666666666	1.38801853494872	1.22370022864414e-06	0.000230272339900588	Actg2	Organismal Systems	Circulatory system	K12315
ENSMUSG00000001943	118	84	55	175	335	301	5.01	3.53	2.37	7.38	14.94	13.47	3.63666666666667	11.93	1.71390544209278	1.28604118604739e-06	0.000239508598205631	Vsig2	-	-	-
ENSMUSG00000021068	407	581	578	260	184	229	3.46	4.44	3.83	1.83	1.10	1.41	3.91	1.44666666666667	-1.43443606558403	1.34389943458379e-06	0.000247450011501224	Nin	-	-	-
ENSMUSG00000042367	850	576	632	1082	1530	1429	22.37	14.74	16.32	28.28	42.39	39.57	17.81	36.7466666666667	1.04492587088152	1.35607811450989e-06	0.000247450011501224	Gjb3	-	-	-
ENSMUSG00000075254	2035	2356	2007	1277	1221	1012	16.09	20.21	15.69	9.63	8.56	7.14	17.33	8.44333333333333	-1.03738707816883	1.48413864779238e-06	0.000267550406003916	Heg1	-	-	-
ENSMUSG00000009246	107	72	68	172	221	186	1.27	1.17	1.20	2.04	2.79	2.73	1.21333333333333	2.52	1.05444778402238	1.5106637925491e-06	0.000267550406003916	Trpm5	Organismal Systems	Sensory system	K04980
ENSMUSG00000051076	289	326	275	120	34	60	5.41	5.95	5.09	2.24	0.67	1.19	5.48333333333333	1.36666666666667	-2.00439176911715	1.55443743710022e-06	0.000270008772127072	Vtcn1	Environmental Information Processing	Signaling molecules and interaction	K06747
ENSMUSG00000074766	171	366	565	109	75	66	2.83	5.91	9.26	1.80	1.32	1.16	6	1.42666666666667	-2.07231420481589	1.59325203053852e-06	0.000274115218396937	Ism1	-	-	-
ENSMUSG00000024517	20	27	25	47	183	124	1.01	1.33	1.25	2.37	9.82	6.66	1.19666666666667	6.28333333333333	2.39250877433297	1.82678871156225e-06	0.000299026522079473	Grp	Environmental Information Processing	Signaling molecules and interaction	K05224
ENSMUSG00000044860	1170	803	666	1883	2246	1482	37.39	25.00	21.04	59.88	75.98	50.19	27.81	62.0166666666667	1.15705223994529	1.83736196793919e-06	0.000299026522079473	Gm1123	-	-	-
ENSMUSG00000024247	928	657	562	1270	1878	1360	25.48	17.76	12.88	30.33	48.26	34.25	18.7066666666667	37.6133333333333	1.00769165696567	1.9476505201434e-06	0.00031136554554328	Pkdcc	-	-	-
ENSMUSG00000020331	144	105	108	237	266	209	2.25	1.61	1.64	3.63	4.33	3.41	1.83333333333333	3.79	1.04772873048023	1.99457153974505e-06	0.000316069604083283	Hcn2	Environmental Information Processing;Organismal Systems	Signal transduction;Endocrine system	K04955;K04955
ENSMUSG00000026208	6460	8063	7340	9355	23482	21670	104.80	127.44	117.70	151.00	403.25	372.55	116.646666666667	308.933333333333	1.4051504624962	2.09619695040227e-06	0.000325885468156527	Des	Human Diseases;Human Diseases;Human Diseases	Cardiovascular diseases;Cardiovascular diseases;Cardiovascular diseases	K07610;K07610;K07610
ENSMUSG00000058952	658	1788	1204	459	164	237	15.90	42.32	30.53	10.79	4.10	6.18	29.5833333333333	7.02333333333333	-2.07455680534946	2.11063380981532e-06	0.000325885468156527	Cfi	Human Diseases;Organismal Systems	Infectious diseases;Immune system	K01333;K01333
ENSMUSG00000027360	85	89	193	30	23	25	1.75	1.78	3.92	0.61	0.50	0.54	2.48333333333333	0.55	-2.17477440110371	2.2345088677392e-06	0.000339264816602967	Hdc	Metabolism;Metabolism	Global and overview maps;Amino acid metabolism	K01590;K01590
ENSMUSG00000029161	1719	1187	1368	2243	3765	2671	58.56	39.39	46.06	76.03	135.77	96.42	48.0033333333333	102.74	1.09779148417402	2.23484711739569e-06	0.000339264816602967	Cgref1	-	-	-
ENSMUSG00000025432	1351	2620	2266	956	543	751	28.76	52.83	40.76	17.61	9.91	15.70	40.7833333333333	14.4066666666667	-1.50124312410724	2.34454371175648e-06	0.000350067148239308	Avil	-	-	-
ENSMUSG00000024558	276	563	489	189	100	114	2.95	5.85	5.17	2.01	1.13	1.29	4.65666666666667	1.47666666666667	-1.65695341685444	2.34476196717167e-06	0.000350067148239308	Mapk4	Organismal Systems	Immune system	K06855
ENSMUSG00000067818	4608	4553	3832	5705	14683	11944	200.67	193.17	164.95	247.20	676.86	551.21	186.263333333333	491.756666666667	1.40060090896282	2.40052559071734e-06	0.00035545487537958	Myl9	Human Diseases;Human Diseases;Cellular Processes;Environmental Information Processing;Cellular Processes;Organismal Systems;Environmental Information Processing;Cellular Processes;Organismal Systems;Organismal Systems;Organismal Systems	Infectious diseases;Infectious diseases;Cell motility;Signal transduction;Cellular community - eukaryotes;Development;Signal transduction;Cellular community - eukaryotes;Endocrine system;Circulatory system;Immune system	K12755;K12755;K12755;K12755;K12755;K12755;K12755;K12755;K12755;K12755;K12755
ENSMUSG00000112129	55	53	19	138	149	137	1.30	1.06	0.38	3.19	3.63	3.35	0.913333333333333	3.39	1.89207188089697	2.5670683787042e-06	0.000373984598881382	Pbld1	-	-	-
ENSMUSG00000015134	2578	3210	3152	1389	418	795	38.71	47.04	47.01	20.58	6.86	13.07	44.2533333333333	13.5033333333333	-1.71247054439187	2.68048240653005e-06	0.000381284228469884	Aldh1a3	Metabolism;Human Diseases;Metabolism;Metabolism;Metabolism;Metabolism;Metabolism;Metabolism;Metabolism	Global and overview maps;Cancers;Xenobiotics biodegradation and metabolism;Xenobiotics biodegradation and metabolism;Carbohydrate metabolism;Amino acid metabolism;Metabolism of other amino acids;Amino acid metabolism;Amino acid metabolism	K00129;K00129;K00129;K00129;K00129;K00129;K00129;K00129;K00129
ENSMUSG00000041920	400	404	450	196	149	219	6.64	5.76	6.84	3.05	2.59	3.73	6.41333333333333	3.12333333333333	-1.03798784611086	2.69491759359309e-06	0.000381284228469884	Slc16a6	-	-	-
ENSMUSG00000025347	2724	1769	960	5210	4704	4284	108.79	68.83	37.90	207.03	198.86	181.31	71.84	195.733333333333	1.44603021226827	2.98419166105131e-06	0.000414835335541405	Mettl7b	-	-	-
ENSMUSG00000037335	38	48	46	77	231	163	0.98	1.21	1.17	1.98	6.31	4.46	1.12	4.25	1.92396410896746	3.16116529398925e-06	0.000432624629059969	Hand1	Cellular Processes	Cellular community - eukaryotes	K09071
ENSMUSG00000028989	60	82	107	124	410	404	1.37	1.82	2.41	2.81	9.88	9.75	1.86666666666667	7.48	2.00257394366382	3.2916317097168e-06	0.000435921380652246	Angptl7	-	-	-
ENSMUSG00000025938	268	868	1030	216	61	102	1.56	4.99	5.98	1.27	0.37	0.63	4.17666666666667	0.756666666666667	-2.46462221203095	3.33602245972632e-06	0.000436704679238811	Slco5a1	-	-	-
ENSMUSG00000027485	37	43	51	7	5	8	1.07	1.21	1.46	0.20	0.15	0.25	1.24666666666667	0.2	-2.64000386427912	3.40749133526757e-06	0.000440031542842694	Bpifb1	-	-	-
ENSMUSG00000071604	539	326	365	856	682	942	10.39	6.12	6.96	16.42	13.92	19.25	7.82333333333333	16.53	1.0792313834903	3.43451135016993e-06	0.000440031542842694	Fam189a2	-	-	-
ENSMUSG00000053477	1656	2970	3258	1257	591	710	22.36	36.63	48.57	15.10	6.33	9.84	35.8533333333333	10.4233333333333	-1.78229053594784	3.55352025234548e-06	0.00045117544785289	Tcf4	-	-	-
ENSMUSG00000026556	508	680	823	322	218	296	7.06	7.36	10.79	3.48	2.55	3.92	8.40333333333333	3.31666666666667	-1.34122768742753	3.5941388484824e-06	0.00045117544785289	Vangl2	Environmental Information Processing	Signal transduction	K04510
ENSMUSG00000044313	197	302	280	73	11	50	3.07	4.89	4.47	1.24	0.19	0.79	4.14333333333333	0.74	-2.48519471470238	3.61676632243777e-06	0.00045117544785289	Mab21l3	-	-	-
ENSMUSG00000027978	144	480	572	108	26	49	2.72	8.83	10.67	2.03	0.52	0.98	7.40666666666667	1.17666666666667	-2.65411872811791	3.62139163790031e-06	0.00045117544785289	Prss12	-	-	-
ENSMUSG00000055827	772	676	339	1064	1763	1954	18.19	16.29	7.89	26.46	43.76	48.40	14.1233333333333	39.54	1.48523224308648	3.65429400742781e-06	0.000452156309891668	Gsdmc3	-	-	-
ENSMUSG00000005413	557	834	900	380	310	228	17.44	25.44	27.85	11.84	10.27	7.56	23.5766666666667	9.89	-1.25331733448498	3.81042194177206e-06	0.000468267159034777	Hmox1	Metabolism;Human Diseases;Human Diseases;Human Diseases;Human Diseases;Environmental Information Processing;Organismal Systems;Metabolism;Cellular Processes	Global and overview maps;Cancers;Cancers;Cancers;Cardiovascular diseases;Signal transduction;Digestive system;Metabolism of cofactors and vitamins;Cell growth and death	K00510;K00510;K00510;K00510;K00510;K00510;K00510;K00510;K00510
ENSMUSG00000028370	171	149	326	75	34	27	0.76	0.65	1.44	0.33	0.16	0.13	0.95	0.206666666666667	-2.20062179866523	4.00595666738277e-06	0.000485688638901139	Pappa	-	-	-
ENSMUSG00000038700	77	66	42	137	171	143	2.00	1.67	1.08	3.53	4.69	3.93	1.58333333333333	4.05	1.35495689527484	4.44046703301797e-06	0.000524294359159932	Hoxb5	-	-	-
ENSMUSG00000062175	308	480	526	213	156	146	5.70	8.34	9.16	3.63	2.85	2.68	7.73333333333333	3.05333333333333	-1.34070530191799	4.86591804661339e-06	0.000563479548154301	Tgif2	Environmental Information Processing	Signal transduction	K19553
ENSMUSG00000075702	1087	829	578	1447	2838	1777	75.53	56.12	39.69	100.03	208.73	130.84	57.1133333333333	146.533333333333	1.35932939268745	4.90892114468459e-06	0.000564623565799911	Selenom	-	-	-
ENSMUSG00000053646	1319	2240	1969	955	670	804	8.66	13.13	12.60	5.61	4.25	5.11	11.4633333333333	4.99	-1.19991489446837	4.93830741192283e-06	0.000564623565799911	Plxnb1	Organismal Systems	Development	K06821
ENSMUSG00000078886	79	94	104	25	33	26	2.40	2.78	3.12	0.74	1.06	0.83	2.76666666666667	0.876666666666667	-1.65804853694199	5.36968590324873e-06	0.000602505440013592	Gm2026	Human Diseases	Infectious diseases	K09228
ENSMUSG00000076435	3602	2071	1530	5269	6141	5312	56.10	31.42	23.55	81.65	101.24	87.67	37.0233333333333	90.1866666666667	1.28447936735746	5.44311967839064e-06	0.000606975043148931	Acsf2	-	-	-
ENSMUSG00000045551	31	47	63	9	3	6	1.15	1.70	2.31	0.33	0.12	0.24	1.72	0.23	-2.90270279864508	5.66599375704454e-06	0.000627952007490856	Fpr1	Environmental Information Processing;Human Diseases;Environmental Information Processing	Signaling molecules and interaction;Infectious diseases;Signal transduction	K04172;K04172;K04172
ENSMUSG00000025383	144	288	252	80	43	76	5.20	10.13	9.00	2.88	1.64	2.91	8.11	2.47666666666667	-1.71130220439983	5.88060657561599e-06	0.000640458660567122	Il23a	Human Diseases;Environmental Information Processing;Human Diseases;Human Diseases;Environmental Information Processing;Organismal Systems;Organismal Systems;Human Diseases;Human Diseases	Cancers;Signaling molecules and interaction;Infectious diseases;Immune diseases;Signal transduction;Immune system;Immune system;Immune diseases;Infectious diseases	K05426;K05426;K05426;K05426;K05426;K05426;K05426;K05426;K05426
ENSMUSG00000036902	336	519	560	196	67	138	3.99	5.54	6.75	1.96	0.77	1.49	5.42666666666667	1.40666666666667	-1.94778579555906	5.88519998085481e-06	0.000640458660567122	Neto2	-	-	-
ENSMUSG00000022445	392	279	200	708	552	574	11.40	7.85	5.72	20.36	16.89	17.59	8.32333333333333	18.28	1.13503274985101	5.93651055370634e-06	0.000641582761316412	Cyp2d26	Organismal Systems;Metabolism	Nervous system;Lipid metabolism	K07414;K07414
ENSMUSG00000048234	2542	4119	3303	1869	1080	1125	52.76	82.37	64.53	38.06	22.71	24.08	66.5533333333333	28.2833333333333	-1.23455876648991	5.96722113206315e-06	0.000641582761316412	Rnf149	-	-	-
ENSMUSG00000015243	1272	2071	1450	851	451	426	6.09	9.66	6.86	4.05	2.29	2.16	7.53666666666667	2.83333333333333	-1.41142624572647	6.00207509894678e-06	0.000641582761316412	Abca1	Environmental Information Processing;Organismal Systems;Organismal Systems	Membrane transport;Digestive system;Digestive system	K05641;K05641;K05641
ENSMUSG00000052512	1672	2340	2636	1203	780	1001	7.68	10.94	12.40	5.88	3.79	5.17	10.34	4.94666666666667	-1.06370759441529	6.32671246618503e-06	0.000668374623986155	Nav2	-	-	-
ENSMUSG00000010175	4792	7412	6106	3005	1071	1930	30.31	45.30	37.82	18.83	7.11	12.92	37.81	12.9533333333333	-1.54544444912305	6.53459598151142e-06	0.000670724297761386	Prox1	Environmental Information Processing	Signal transduction	K20211
ENSMUSG00000032085	10496	9363	8089	11948	27899	23567	325.46	285.10	248.30	369.09	915.42	773.39	286.286666666667	685.966666666667	1.26067799215543	6.7293113749241e-06	0.000682949494314629	Tagln	-	-	-
ENSMUSG00000048078	2302	3470	5912	1531	851	1324	13.43	14.55	28.91	6.69	3.53	6.01	18.9633333333333	5.41	-1.80951208114679	7.38432701930472e-06	0.000727067019014964	Tenm4	-	-	-
ENSMUSG00000064254	4945	3053	2277	6958	7794	7177	163.69	98.46	74.50	229.16	273.10	251.76	112.216666666667	251.34	1.16335332593058	7.42768455754941e-06	0.000727067019014964	Ethe1	Metabolism;Metabolism	Global and overview maps;Energy metabolism	K17725;K17725
ENSMUSG00000032484	27	15	143	1	2	4	1.09	0.59	5.68	0.04	0.09	0.17	2.45333333333333	0.1	-4.61667136044849	7.49231348603293e-06	0.000727067019014964	Ngp	-	-	-
ENSMUSG00000026494	1026	899	1187	533	190	230	4.20	3.67	5.23	2.19	0.83	1.00	4.36666666666667	1.34	-1.70429940524589	7.6764796131718e-06	0.000732214651219078	Kif26b	-	-	-
ENSMUSG00000078161	838	2010	1274	569	172	285	6.27	12.82	7.61	4.43	1.36	2.56	8.9	2.78333333333333	-1.6769916392135	7.70112281935371e-06	0.000732214651219078	Erich3	-	-	-
ENSMUSG00000003657	95	91	82	134	503	282	3.26	3.04	2.78	4.58	18.31	10.26	3.02666666666667	11.05	1.86824466770903	7.9986296732129e-06	0.000756519607573775	Calb2	-	-	-
ENSMUSG00000023036	374	533	304	645	893	794	6.73	10.46	5.68	12.72	18.63	16.79	7.62333333333333	16.0466666666667	1.07377977606283	8.35318390537787e-06	0.000785938891930475	Pcdhgc4	-	-	-
ENSMUSG00000025732	276	271	313	443	726	465	16.05	15.35	17.97	25.66	47.72	28.65	16.4566666666667	34.01	1.0472868616879	8.41612210233444e-06	0.000787757750148558	Mcrip2	-	-	-
ENSMUSG00000029380	432	331	196	121	51	34	22.27	16.62	9.99	6.21	2.78	1.86	16.2933333333333	3.61666666666667	-2.17154924248688	8.64795127737424e-06	0.000805284741369926	Cxcl1	Environmental Information Processing;Environmental Information Processing;Human Diseases;Human Diseases;Organismal Systems;Human Diseases;Organismal Systems;Environmental Information Processing;Organismal Systems;Environmental Information Processing;Human Diseases;Human Diseases	Signaling molecules and interaction;Signal transduction;Immune diseases;Infectious diseases;Immune system;Infectious diseases;Immune system;Signal transduction;Immune system;Signaling molecules and interaction;Infectious diseases;Infectious diseases	K05505;K05505;K05505;K05505;K05505;K05505;K05505;K05505;K05505;K05505;K05505;K05505
ENSMUSG00000022376	966	1467	1318	589	165	283	6.80	10.07	9.17	4.14	1.23	2.11	8.68	2.49333333333333	-1.799619273278	8.86536347028096e-06	0.00082129636456731	Adcy8	Metabolism;Human Diseases;Environmental Information Processing;Human Diseases;Environmental Information Processing;Environmental Information Processing;Human Diseases;Organismal Systems;Environmental Information Processing;Human Diseases;Organismal Systems;Environmental Information Processing;Human Diseases;Organismal Systems;Organismal Systems;Organismal Systems;Organismal Systems;Metabolism;Org…	Global and overview maps;Cancers;Signal transduction;Infectious diseases;Signal transduction;Signal transduction;Infectious diseases;Environmental adaptation;Signal transduction;Cardiovascular diseases;Immune system;Signal transduction;Endocrine and metabolic diseases;Endocrine system;Nervous system;Circulatory system;Endocrine system;Nucleotide metabolism;Circulatory system;Signal transduction;E…	K08048;K08048;K08048;K08048;K08048;K08048;K08048;K08048;K08048;K08048;K08048;K08048;K08048;K08048;K08048;K08048;K08048;K08048;K08048;K08048;K08048;K08048;K08048;K08048;K08048;K08048;K08048;K08048;K08048;K08048;K08048;K08048;K08048;K08048;K08048;K08048;K08048;K08048;K08048;K08048;K08048;K08048;K08048;K08048;K08048;K08048;K08048;K08048;K08048;K08048
ENSMUSG00000026074	2740	3602	3418	1943	1178	1559	33.99	41.78	41.87	22.09	14.87	19.64	39.2133333333333	18.8666666666667	-1.05550473116782	8.95098242971411e-06	0.000824997436697885	Map4k4	Environmental Information Processing	Signal transduction	K04407
ENSMUSG00000047910	91	89	83	34	26	23	0.86	0.82	0.77	0.32	0.26	0.23	0.816666666666667	0.27	-1.59678793611795	9.14700213865501e-06	0.000834548452701024	Pcdhb16	-	-	-
ENSMUSG00000038193	83	107	103	146	345	266	1.73	2.18	2.13	3.04	7.63	5.89	2.01333333333333	5.52	1.45508221817425	9.34322291755215e-06	0.000845320363076714	Hand2	-	-	-
ENSMUSG00000014813	140	183	168	74	62	41	1.64	2.09	1.94	0.86	0.77	0.51	1.89	0.713333333333333	-1.40573793854108	9.3586533415634e-06	0.000845320363076714	Stc1	-	-	-
ENSMUSG00000036854	202	231	193	284	524	575	7.28	8.11	6.88	10.18	19.99	21.96	7.42333333333333	17.3766666666667	1.22701230180823	9.67839711414256e-06	0.000869851959537241	Hspb6	-	-	-
ENSMUSG00000048096	487	566	467	668	1466	1128	6.06	6.86	5.74	8.27	19.31	14.87	6.22	14.15	1.18581556758864	1.01816024039943e-05	0.000897222670381258	Lmod1	-	-	-
ENSMUSG00000000216	165	36	116	20	2	6	2.71	0.58	1.88	0.33	0.03	0.10	1.72333333333333	0.153333333333333	-3.49045851425792	1.07683747425307e-05	0.000935243700595278	Scnn1g	Organismal Systems;Organismal Systems	Sensory system;Excretory system	K04827;K04827
ENSMUSG00000021994	658	517	809	358	253	239	6.90	5.38	8.66	3.72	2.77	2.66	6.98	3.05	-1.1944177937594	1.18460996127491e-05	0.00101156393329862	Wnt5a	Human Diseases;Human Diseases;Human Diseases;Human Diseases;Organismal Systems;Human Diseases;Environmental Information Processing;Human Diseases;Environmental Information Processing;Environmental Information Processing;Human Diseases;Human Diseases;Cellular Processes;Organismal Systems;Human Diseases	Cancers;Infectious diseases;Neurodegenerative diseases;Cancers;Development;Cancers;Signal transduction;Endocrine and metabolic diseases;Signal transduction;Signal transduction;Cancers;Cancers;Cellular community - eukaryotes;Endocrine system;Cancers	K00444;K00444;K00444;K00444;K00444;K00444;K00444;K00444;K00444;K00444;K00444;K00444;K00444;K00444;K00444
ENSMUSG00000019838	882	1029	1700	542	327	479	8.49	9.62	17.80	5.11	3.32	6.18	11.97	4.87	-1.29742947486116	1.19426150813357e-05	0.00101156393329862	Slc16a10	Organismal Systems;Organismal Systems	Endocrine system;Digestive system	K08187;K08187
ENSMUSG00000026475	268	304	219	132	87	64	5.63	6.22	4.55	2.76	1.93	1.42	5.46666666666667	2.03666666666667	-1.42445152968672	1.2095090483947e-05	0.00101156393329862	Rgs16	-	-	-
ENSMUSG00000040471	628	388	450	782	1045	922	19.29	11.42	13.71	23.80	35.57	29.81	14.8066666666667	29.7266666666667	1.00551080676692	1.24434339391493e-05	0.00103114969775565	Ggt6	Metabolism;Metabolism;Metabolism	Global and overview maps;Metabolism of other amino acids;Metabolism of other amino acids	K00681;K00681;K00681
ENSMUSG00000037166	166	182	115	242	583	375	8.58	9.21	6.15	12.67	32.00	20.75	7.98	21.8066666666667	1.45030860713928	1.26728966752863e-05	0.00104536930794085	Ppp1r14a	Organismal Systems	Circulatory system	K12328
ENSMUSG00000058135	5558	3823	2613	6777	10429	8929	213.17	143.12	98.84	258.63	424.26	362.59	151.71	348.493333333333	1.19981487334726	1.38915600248571e-05	0.00113041005337407	Gstm1	Metabolism;Human Diseases;Human Diseases;Human Diseases;Human Diseases;Metabolism;Organismal Systems;Metabolism;Human Diseases;Metabolism;Metabolism	Global and overview maps;Cancers;Cancers;Cardiovascular diseases;Cancers;Xenobiotics biodegradation and metabolism;Aging;Xenobiotics biodegradation and metabolism;Drug resistance;Xenobiotics biodegradation and metabolism;Metabolism of other amino acids	K00799;K00799;K00799;K00799;K00799;K00799;K00799;K00799;K00799;K00799;K00799
ENSMUSG00000032186	259	1046	1516	244	192	120	1.94	6.21	8.93	1.45	1.24	0.67	5.69333333333333	1.12	-2.34577483684173	1.42078790470185e-05	0.00114958630010666	Tmod2	-	-	-
ENSMUSG00000075588	29	30	13	60	98	87	0.88	0.88	0.39	1.80	3.13	2.78	0.716666666666667	2.57	1.84239420032557	1.42544883046715e-05	0.00114958630010666	Hoxb2	-	-	-
ENSMUSG00000018623	7254	14066	7984	4199	1305	2909	333.65	630.30	362.97	192.16	63.54	141.79	442.306666666667	132.496666666667	-1.73909092241516	1.44701167749498e-05	0.00116178959795319	Mmp7	Human Diseases;Environmental Information Processing	Infectious diseases;Signal transduction	K01397;K01397
ENSMUSG00000041202	145	115	134	59	38	28	4.30	3.38	4.14	1.74	1.17	0.77	3.94	1.22666666666667	-1.68345236412052	1.51703066404063e-05	0.00119998452014536	Pla2g2d	Metabolism;Environmental Information Processing;Organismal Systems;Organismal Systems;Metabolism;Metabolism;Metabolism;Metabolism;Organismal Systems;Metabolism	Global and overview maps;Signal transduction;Circulatory system;Digestive system;Lipid metabolism;Lipid metabolism;Lipid metabolism;Lipid metabolism;Digestive system;Lipid metabolism	K01047;K01047;K01047;K01047;K01047;K01047;K01047;K01047;K01047;K01047
ENSMUSG00000042485	415	355	352	509	1031	771	16.49	13.75	13.83	20.13	43.37	32.47	14.69	31.99	1.12278659655939	1.5222669663957e-05	0.00119998452014536	Mustn1	-	-	-
ENSMUSG00000038578	292	425	493	188	148	181	4.35	6.17	7.26	2.79	2.34	2.86	5.92666666666667	2.66333333333333	-1.1539879159018	1.52779651056425e-05	0.00119998452014536	Susd1	-	-	-
ENSMUSG00000014846	384	378	276	528	1423	732	18.21	17.50	11.85	23.99	67.40	33.74	15.8533333333333	41.71	1.39560709786473	1.54367263656838e-05	0.00120720546232068	Tppp3	-	-	-
ENSMUSG00000033777	149	185	202	89	58	48	1.80	2.18	2.42	1.07	0.74	0.62	2.13333333333333	0.81	-1.39711559128158	1.56133027096823e-05	0.00121575135107936	Tlr13	-	-	-
ENSMUSG00000039976	818	993	1315	549	505	463	5.97	7.23	10.39	4.01	3.98	3.51	7.86333333333333	3.83333333333333	-1.03654155740773	1.70260964929819e-05	0.00128585260765418	Tbc1d16	-	-	-
ENSMUSG00000027737	507	851	709	315	89	173	2.70	4.42	3.73	1.67	0.54	0.98	3.61666666666667	1.06333333333333	-1.76606671356698	1.71835240620364e-05	0.00128805129535555	Slc7a11	Cellular Processes	Cell growth and death	K13869
ENSMUSG00000023484	73	88	81	116	374	241	2.75	4.14	2.60	3.53	13.27	7.81	3.16333333333333	8.20333333333333	1.37476466543705	1.74599291619628e-05	0.00129463622902801	Prph	Human Diseases	Neurodegenerative diseases	K07607
ENSMUSG00000041570	682	1135	822	475	250	224	5.20	8.42	6.18	3.66	2.07	1.74	6.6	2.49	-1.40632028217773	1.74687394906255e-05	0.00129463622902801	Camsap2	-	-	-
ENSMUSG00000034205	2267	1541	2524	1100	975	800	20.95	13.87	23.05	10.11	9.54	7.84	19.29	9.16333333333333	-1.07390873725731	1.75891556689502e-05	0.00129693100881464	Loxl2	-	-	-
ENSMUSG00000025270	114	110	701	35	45	41	2.79	2.60	17.02	0.86	1.18	1.10	7.47	1.04666666666667	-2.83530618461876	1.77051335359057e-05	0.00130017576148836	Alas2	Metabolism;Metabolism;Metabolism	Global and overview maps;Metabolism of cofactors and vitamins;Amino acid metabolism	K00643;K00643;K00643
ENSMUSG00000042265	58	84	139	29	9	12	0.95	1.38	2.41	0.47	0.16	0.21	1.58	0.28	-2.4964258261195	1.78436195092858e-05	0.00130504043091193	Trem1	-	-	-
ENSMUSG00000095115	788	1081	1557	555	452	425	5.64	7.54	11.01	3.95	3.42	3.22	8.06333333333333	3.53	-1.19170817998759	1.80193820500886e-05	0.00131166354907835	Itpripl2	-	-	-
ENSMUSG00000058908	2426	4238	3679	1602	1096	1716	151.23	257.38	226.69	99.37	72.32	113.36	211.766666666667	95.0166666666667	-1.15622301766773	1.81520004024128e-05	0.00131166354907835	Pla2g2a	Metabolism;Environmental Information Processing;Organismal Systems;Organismal Systems;Metabolism;Metabolism;Metabolism;Metabolism;Organismal Systems;Metabolism	Global and overview maps;Signal transduction;Circulatory system;Digestive system;Lipid metabolism;Lipid metabolism;Lipid metabolism;Lipid metabolism;Digestive system;Lipid metabolism	K01047;K01047;K01047;K01047;K01047;K01047;K01047;K01047;K01047;K01047
ENSMUSG00000070565	420	661	667	316	224	225	3.12	5.21	5.41	2.19	1.44	1.30	4.58	1.64333333333333	-1.47872245244019	1.93313654062684e-05	0.00138579807961999	Rasal2	Environmental Information Processing	Signal transduction	K17633
ENSMUSG00000003863	565	367	237	978	848	777	6.32	3.99	2.60	10.83	10.02	9.12	4.30333333333333	9.99	1.21503008320638	1.9658365878174e-05	0.00140366948454234	Ppfia3	-	-	-
ENSMUSG00000040711	1862	2188	3345	1253	893	1091	12.34	14.13	21.91	8.26	6.26	7.66	16.1266666666667	7.39333333333333	-1.12515140381822	1.98338078896762e-05	0.00140728391888391	Sh3pxd2b	-	-	-
ENSMUSG00000018604	1478	3386	4094	1241	693	954	15.03	33.50	41.19	12.51	7.49	10.28	29.9066666666667	10.0933333333333	-1.56706441510055	1.98647882267034e-05	0.00140728391888391	Tbx3	Cellular Processes	Cellular community - eukaryotes	K10177
ENSMUSG00000026180	30	37	98	7	8	6	0.49	0.62	1.59	0.11	0.17	0.14	0.9	0.14	-2.68449817427207	2.09933895481751e-05	0.00146994411700691	Cxcr2	Environmental Information Processing;Environmental Information Processing;Cellular Processes;Human Diseases;Organismal Systems;Environmental Information Processing;Human Diseases	Signaling molecules and interaction;Signal transduction;Transport and catabolism;Infectious diseases;Immune system;Signaling molecules and interaction;Infectious diseases	K05050;K05050;K05050;K05050;K05050;K05050;K05050
ENSMUSG00000057777	214	203	161	268	542	448	3.89	3.59	2.89	4.85	10.43	8.63	3.45666666666667	7.97	1.2051982358984	2.12823486390116e-05	0.00147304838376914	Mab21l2	-	-	-
ENSMUSG00000019987	574	1889	1815	410	182	451	19.09	61.21	59.67	13.57	6.41	15.90	46.6566666666667	11.96	-1.96386584973526	2.16075586540519e-05	0.00148984941635667	Arg1	Metabolism;Human Diseases;Metabolism;Metabolism;Metabolism	Global and overview maps;Infectious diseases;Global and overview maps;Amino acid metabolism;Amino acid metabolism	K01476;K01476;K01476;K01476;K01476
ENSMUSG00000074480	700	1446	955	498	248	354	5.95	11.98	8.03	4.21	2.23	3.19	8.65333333333333	3.21	-1.43068268015568	2.20734326109709e-05	0.00150474173629128	Mex3a	-	-	-
ENSMUSG00000039878	957	542	401	1301	1589	1399	30.00	16.61	11.84	38.06	49.61	44.70	19.4833333333333	44.1233333333333	1.17930126058835	2.25520482491946e-05	0.00152585300232847	Slc39a5	-	-	-
ENSMUSG00000020672	92	88	58	121	338	240	2.03	1.97	1.29	2.49	7.76	5.83	1.76333333333333	5.36	1.60392777906491	2.36919845783254e-05	0.00159106208701654	Sntg2	-	-	-
ENSMUSG00000025330	386	1376	1245	352	110	210	8.19	28.43	26.10	7.43	2.47	4.72	20.9066666666667	4.87333333333333	-2.10098224816277	2.39983539625259e-05	0.00160268503650427	Padi4	-	-	-
ENSMUSG00000036570	137	126	76	180	387	306	12.33	11.16	6.70	16.52	38.25	29.75	10.0633333333333	28.1733333333333	1.48522201042132	2.41199183575793e-05	0.00160268503650427	Fxyd1	Environmental Information Processing	Signal transduction	K13360
ENSMUSG00000029236	7	15	17	29	134	62	0.42	0.87	1.00	1.71	8.42	3.90	0.763333333333333	4.67666666666667	2.61509550552296	2.46015293667272e-05	0.00162199499273696	Nmu	Environmental Information Processing	Signaling molecules and interaction	K05249
ENSMUSG00000060548	983	1796	3548	788	478	516	12.45	22.00	43.91	10.11	6.72	7.11	26.12	7.98	-1.71069424532408	2.47038682814068e-05	0.00162281956546769	Tnfrsf19	Environmental Information Processing	Signaling molecules and interaction	K05155
ENSMUSG00000054555	610	743	622	363	137	194	3.90	4.63	3.93	2.31	0.93	1.32	4.15333333333333	1.52	-1.45019833885926	2.5739821188006e-05	0.00165752065338994	Adam12	-	-	-
ENSMUSG00000033585	89	62	80	115	310	226	1.18	0.80	1.05	1.52	4.36	3.18	1.01	3.02	1.58019325657328	2.60586392439963e-05	0.00166619446619586	Ndn	-	-	-
ENSMUSG00000030729	1032	2387	1256	731	285	346	8.82	17.83	9.11	5.21	2.22	2.76	11.92	3.39666666666667	-1.8111926850175	2.61020223600015e-05	0.00166619446619586	Pgm2l1	Metabolism;Metabolism	Global and overview maps;Carbohydrate metabolism	K11809;K11809
ENSMUSG00000047497	183	161	237	91	34	42	1.05	0.90	1.34	0.52	0.21	0.25	1.09666666666667	0.326666666666667	-1.74723392962004	2.62943168197016e-05	0.0016725592723518	Adamts12	-	-	-
ENSMUSG00000028635	86	64	33	219	202	117	2.89	2.09	1.10	7.32	7.18	4.17	2.02666666666667	6.22333333333333	1.61857869878261	2.67558247601152e-05	0.001688644306768	Edn2	Environmental Information Processing;Environmental Information Processing;Organismal Systems;Organismal Systems	Signaling molecules and interaction;Signal transduction;Circulatory system;Endocrine system	K16367;K16367;K16367;K16367
ENSMUSG00000038415	1292	1138	2261	760	493	574	13.10	11.25	22.67	7.67	5.29	6.17	15.6733333333333	6.37666666666667	-1.29743766530691	2.68006107251225e-05	0.001688644306768	Foxq1	-	-	-
ENSMUSG00000037972	523	873	907	391	217	306	8.95	14.55	15.33	6.65	3.93	5.55	12.9433333333333	5.37666666666667	-1.26742526875283	2.7358509846529e-05	0.00171014353071815	Snn	-	-	-
ENSMUSG00000029211	12	193	65	10	1	4	0.14	2.68	0.77	0.12	0.01	0.05	1.19666666666667	0.06	-4.31791503238074	2.82919123503502e-05	0.00174582904460892	Gabra4	Environmental Information Processing;Organismal Systems;Human Diseases;Organismal Systems;Organismal Systems;Human Diseases	Signaling molecules and interaction;Nervous system;Substance dependence;Nervous system;Sensory system;Substance dependence	K05175;K05175;K05175;K05175;K05175;K05175
ENSMUSG00000031278	571	1284	1031	461	271	320	5.57	12.32	10.01	4.50	2.82	3.32	9.3	3.54666666666667	-1.39076697121536	2.83272737814014e-05	0.00174582904460892	Acsl4	Metabolism;Organismal Systems;Organismal Systems;Cellular Processes;Organismal Systems;Metabolism;Metabolism;Cellular Processes;Metabolism	Global and overview maps;Environmental adaptation;Endocrine system;Transport and catabolism;Endocrine system;Global and overview maps;Lipid metabolism;Cell growth and death;Lipid metabolism	K01897;K01897;K01897;K01897;K01897;K01897;K01897;K01897;K01897
ENSMUSG00000031303	172	272	218	108	86	85	1.94	3.00	2.43	1.22	1.03	1.01	2.45666666666667	1.08666666666667	-1.17679265486399	2.85092481682608e-05	0.00174582904460892	Map3k15	-	-	-
ENSMUSG00000056973	825	434	252	1367	1665	1090	20.22	10.36	6.11	33.34	43.20	28.31	12.23	34.95	1.51486805173541	3.20506182806128e-05	0.00189213862496494	Ces1d	Metabolism	Xenobiotics biodegradation and metabolism	K01044
ENSMUSG00000026581	118	72	115	33	31	32	2.00	1.27	2.46	0.75	0.66	0.78	1.91	0.73	-1.38760426915573	3.21948465712998e-05	0.0018944622257672	Sell	Environmental Information Processing	Signaling molecules and interaction	K06495
ENSMUSG00000090100	524	1133	774	394	212	275	3.19	5.93	5.35	2.46	1.52	1.75	4.82333333333333	1.91	-1.33645787777482	3.40833774353059e-05	0.00197408651842505	Ttbk2	-	-	-
ENSMUSG00000023913	882	1211	1109	648	436	344	23.43	31.70	29.29	16.34	10.81	8.78	28.14	11.9766666666667	-1.23239589395552	3.49779103419237e-05	0.00201877300423914	Pla2g7	Metabolism;Metabolism	Global and overview maps;Lipid metabolism	K01062;K01062
ENSMUSG00000022803	94	100	82	125	294	272	2.14	2.21	1.85	2.85	7.13	6.64	2.06666666666667	5.54	1.4225802614961	3.52749850132478e-05	0.00202943504542777	Popdc2	-	-	-
ENSMUSG00000036412	146	189	133	77	42	41	2.41	3.04	2.17	1.27	0.73	0.72	2.54	0.906666666666667	-1.48618434624298	3.61726675929392e-05	0.00206790898755204	Arsi	-	-	-
ENSMUSG00000062563	88	60	59	119	264	163	2.88	1.70	2.19	3.70	8.03	5.50	2.25666666666667	5.74333333333333	1.34769496264995	3.69225868610678e-05	0.00209092956628586	Cys1	-	-	-
ENSMUSG00000035561	3002	1747	1100	3904	5267	4484	64.87	37.20	23.24	83.65	120.37	103.48	41.77	102.5	1.29508486111738	3.90859392905906e-05	0.00219964951178978	Aldh1b1	Metabolism;Metabolism;Metabolism;Metabolism;Metabolism;Metabolism;Metabolism;Metabolism;Metabolism;Metabolism;Metabolism;Metabolism;Metabolism	Global and overview maps;Carbohydrate metabolism;Amino acid metabolism;Lipid metabolism;Amino acid metabolism;Amino acid metabolism;Lipid metabolism;Amino acid metabolism;Carbohydrate metabolism;Metabolism of other amino acids;Carbohydrate metabolism;Amino acid metabolism;Metabolism of terpenoids and polyketides	K00128;K00128;K00128;K00128;K00128;K00128;K00128;K00128;K00128;K00128;K00128;K00128;K00128
ENSMUSG00000031229	1303	2458	1573	927	473	671	8.72	16.42	10.46	5.97	4.07	4.42	11.8666666666667	4.82	-1.29980968890265	4.05456834374602e-05	0.00226067213363493	Atrx	-	-	-
ENSMUSG00000025515	102043	66468	82853	107443	188415	188675	360.21	228.58	289.08	377.36	704.03	705.80	292.623333333333	595.73	1.02561380036063	4.20118059964421e-05	0.00232092744747929	Muc2	Human Diseases;Human Diseases	Infectious diseases;Cancers	K10955;K10955
ENSMUSG00000032060	189	206	196	255	655	448	10.53	10.71	10.26	13.70	37.18	25.46	10.5	25.4466666666667	1.27708735794092	4.2414736118351e-05	0.00232792087599574	Cryab	Genetic Information Processing;Organismal Systems	Folding, sorting and degradation;Aging	K09542;K09542
ENSMUSG00000067235	107	108	74	154	200	224	3.52	3.49	2.44	5.11	7.06	7.92	3.15	6.69666666666667	1.08809132962486	4.24543854995607e-05	0.00232792087599574	H2-Q10	Human Diseases;Human Diseases;Human Diseases;Cellular Processes;Human Diseases;Human Diseases;Cellular Processes;Human Diseases;Human Diseases;Human Diseases;Human Diseases;Human Diseases;Human Diseases;Environmental Information Processing;Cellular Processes;Organismal Systems;Human Diseases;Human Diseases	Infectious diseases;Infectious diseases;Infectious diseases;Transport and catabolism;Infectious disease: viral;Infectious diseases;Transport and catabolism;Infectious diseases;Cardiovascular diseases;Immune diseases;Cancers;Immune diseases;Infectious diseases;Signaling molecules and interaction;Cell growth and death;Immune system;Endocrine and metabolic diseases;Immune diseases	K06751;K06751;K06751;K06751;K06751;K06751;K06751;K06751;K06751;K06751;K06751;K06751;K06751;K06751;K06751;K06751;K06751;K06751
ENSMUSG00000016534	6953	18139	23234	6772	4051	4236	144.73	360.46	469.36	137.73	85.84	92.57	324.85	105.38	-1.6241726203603	4.25249869404148e-05	0.00232792087599574	Lamp2	Cellular Processes;Human Diseases;Cellular Processes;Cellular Processes	Transport and catabolism;Infectious diseases;Transport and catabolism;Transport and catabolism	K06528;K06528;K06528;K06528
ENSMUSG00000040152	5168	6322	9626	3879	2831	2686	43.41	51.74	79.92	32.42	25.17	23.91	58.3566666666667	27.1666666666667	-1.10305992023277	4.44333645811368e-05	0.00240325967412646	Thbs1	Environmental Information Processing;Human Diseases;Cellular Processes;Environmental Information Processing;Human Diseases;Cellular Processes;Human Diseases;Human Diseases;Environmental Information Processing;Environmental Information Processing;Cellular Processes;Human Diseases	Signal transduction;Infectious diseases;Transport and catabolism;Signal transduction;Cancers;Cellular community - eukaryotes;Cancers;Infectious diseases;Signal transduction;Signaling molecules and interaction;Cell growth and death;Cancers	K16857;K16857;K16857;K16857;K16857;K16857;K16857;K16857;K16857;K16857;K16857;K16857
ENSMUSG00000067889	1103	1308	1343	799	485	617	9.75	10.50	11.76	6.34	3.54	4.41	10.67	4.76333333333333	-1.16351676044977	4.6093586748744e-05	0.00246355220300609	Sptbn2	Human Diseases	Neurodegenerative disease	K23932
ENSMUSG00000020916	1274	946	1288	553	108	218	37.45	27.09	37.43	16.18	3.36	6.79	33.99	8.77666666666667	-1.95336534121676	4.68878319437022e-05	0.00249569939697414	Krt36	Human Diseases;Organismal Systems	Infectious diseases;Endocrine system	K07604;K07604
ENSMUSG00000046186	139	123	93	181	290	245	1.17	1.00	0.77	1.51	2.57	2.18	0.98	2.08666666666667	1.09034650209626	4.759317181759e-05	0.00251394926574492	Cd109	-	-	-
ENSMUSG00000027581	28	39	31	57	195	95	1.21	1.64	1.32	2.45	8.93	4.35	1.39	5.24333333333333	1.91539938197102	4.79926599851639e-05	0.00252238601395558	Stmn3	-	-	-
ENSMUSG00000035783	12364	10007	9398	12601	30187	23971	320.64	247.11	235.19	312.07	812.16	639.13	267.646666666667	587.786666666667	1.13496294820584	4.8032149947452e-05	0.00252238601395558	Acta2	Organismal Systems;Environmental Information Processing;Organismal Systems	Circulatory system;Signal transduction;Endocrine system	K12313;K12313;K12313
ENSMUSG00000034818	95	85	49	187	154	151	1.27	0.98	0.60	2.48	2.12	2.09	0.95	2.23	1.23104429158936	5.0500875822088e-05	0.00260698029633426	Celf5	-	-	-
ENSMUSG00000044103	35	169	110	27	9	9	1.04	4.91	3.24	0.80	0.28	0.30	3.06333333333333	0.46	-2.73539659451086	5.05088903247712e-05	0.00260698029633426	Il1f9	Environmental Information Processing	Signaling molecules and interaction	K05487
ENSMUSG00000082361	232	322	365	151	139	138	3.96	5.36	6.16	2.57	2.51	2.50	5.16	2.52666666666667	-1.03013571797332	5.07787405458736e-05	0.00261344144718292	Btc	Environmental Information Processing	Signal transduction	K09783
ENSMUSG00000060429	185	563	594	163	113	107	1.85	5.48	5.86	1.62	1.19	1.13	4.39666666666667	1.31333333333333	-1.74317702979517	5.2039399077707e-05	0.00265562639643722	Sntb1	-	-	-
ENSMUSG00000026452	31	28	20	73	61	63	0.23	0.19	0.14	0.52	0.46	0.48	0.186666666666667	0.486666666666667	1.38246963682241	5.32594540059408e-05	0.0026880028096936	Syt2	-	-	-
ENSMUSG00000000142	4134	6620	8034	3357	1821	2536	58.49	89.10	115.05	46.50	26.25	36.26	87.5466666666667	36.3366666666667	-1.26862616874919	5.36866453888138e-05	0.0027015299413619	Axin2	Human Diseases;Human Diseases;Human Diseases;Human Diseases;Environmental Information Processing;Human Diseases;Environmental Information Processing;Human Diseases;Human Diseases;Cellular Processes;Human Diseases;Human Diseases;Human Diseases	Cancers;Infectious diseases;Neurodegenerative diseases;Cancers;Signal transduction;Endocrine and metabolic diseases;Signal transduction;Cancers;Cancers;Cellular community - eukaryotes;Cancers;Cancers;Cancers	K04385;K04385;K04385;K04385;K04385;K04385;K04385;K04385;K04385;K04385;K04385;K04385;K04385
ENSMUSG00000022864	203	247	222	125	79	61	3.67	3.95	4.39	2.14	1.31	1.15	4.00333333333333	1.53333333333333	-1.38453038476126	5.86054383624671e-05	0.0028537113272434	D16Ertd472e	-	-	-
ENSMUSG00000078794	192	203	166	242	489	410	3.16	3.25	2.70	3.96	8.51	7.14	3.03666666666667	6.53666666666667	1.1060665763901	5.95928407829339e-05	0.00289393728156909	Dact3	-	-	-
ENSMUSG00000037129	340	214	401	143	38	68	5.15	3.16	6.00	2.15	0.61	1.09	4.77	1.28333333333333	-1.89409332114441	6.11645589689751e-05	0.00294172037631799	Tmprss13	-	-	-
ENSMUSG00000037890	324	903	629	270	168	180	2.75	7.12	5.18	2.14	1.43	1.84	5.01666666666667	1.80333333333333	-1.47606298782025	6.16126699464422e-05	0.00294453143540338	Wdr19	-	-	-
ENSMUSG00000026389	533	379	310	663	1010	690	9.26	6.34	5.38	11.39	18.45	12.69	6.99333333333333	14.1766666666667	1.0194661770485	6.275473336531e-05	0.00295995889881025	Steap3	Cellular Processes;Cellular Processes	Cell growth and death;Cell growth and death	K10142;K10142
ENSMUSG00000023919	105	139	121	49	45	54	3.58	4.56	3.86	1.61	1.59	1.89	4	1.69666666666667	-1.23729684442018	6.33904131832153e-05	0.00297194786738199	Cenpq	-	-	-
ENSMUSG00000033634	12	68	70	7	1	4	0.18	0.99	1.03	0.10	0.02	0.06	0.733333333333333	0.06	-3.61143471208235	6.35386328918781e-05	0.00297194786738199	Nat8f2	Metabolism;Metabolism	Global and overview maps;Metabolism of other amino acids	K20838;K20838
ENSMUSG00000027381	937	1280	1452	710	310	428	10.96	13.93	17.27	8.14	4.03	5.22	14.0533333333333	5.79666666666667	-1.27761693433062	6.46425964478039e-05	0.00300971264131334	Bcl2l11	Human Diseases;Environmental Information Processing;Human Diseases;Human Diseases;Cellular Processes;Human Diseases;Environmental Information Processing;Human Diseases;Human Diseases;Cellular Processes	Cancers;Signal transduction;Infectious diseases;Cancers;Cell growth and death;Endocrine and metabolic diseases;Signal transduction;Cancers;Drug resistance;Cell growth and death	K16341;K16341;K16341;K16341;K16341;K16341;K16341;K16341;K16341;K16341
ENSMUSG00000020218	5254	13763	16523	5415	2124	2714	112.51	287.13	349.73	115.38	48.15	61.59	249.79	75.04	-1.73498398881907	6.6952171721754e-05	0.00308501333998827	Wif1	Environmental Information Processing	Signal transduction	K01691
ENSMUSG00000046768	1133	2050	2476	940	687	738	24.64	42.02	51.92	19.82	15.14	16.24	39.5266666666667	17.0666666666667	-1.21164498650244	6.85336527155624e-05	0.00314228537133663	Rhoj	Human Diseases	Infectious diseases	K07864
ENSMUSG00000076431	3802	4968	5430	2922	1299	1666	38.95	49.58	54.98	29.78	14.09	18.09	47.8366666666667	20.6533333333333	-1.21174222039779	6.89442053078502e-05	0.00314850723256538	Sox4	Human Diseases	Cancers	K23581
ENSMUSG00000074736	21	19	15	36	83	66	0.87	0.44	0.36	0.86	2.31	1.68	0.556666666666667	1.61666666666667	1.53813664460044	6.95529903160371e-05	0.00316185723443292	Syndig1	-	-	-
ENSMUSG00000030825	42	28	13	66	97	124	1.60	0.99	0.48	2.48	3.90	5.00	1.02333333333333	3.79333333333333	1.89018999693641	7.06454884614144e-05	0.00318977564404523	Hsd17b14	-	-	-
ENSMUSG00000063894	355	540	481	264	185	210	2.44	3.00	2.79	1.50	1.09	1.27	2.74333333333333	1.28666666666667	-1.09229158315354	7.08054266959389e-05	0.00318977564404523	Zkscan8	-	-	-
ENSMUSG00000073599	1105	2235	2702	920	702	763	52.05	101.61	124.92	42.67	34.72	37.84	92.86	38.41	-1.2735753170356	7.26224504334911e-05	0.0032338049055377	Ecscr	-	-	-
ENSMUSG00000055980	215	285	255	144	112	94	1.16	1.49	1.35	0.77	0.64	0.53	1.33333333333333	0.646666666666667	-1.04394334758759	7.2807706448121e-05	0.0032338049055377	Irs1	Environmental Information Processing;Human Diseases;Environmental Information Processing;Human Diseases;Environmental Information Processing;Cellular Processes;Human Diseases;Organismal Systems;Environmental Information Processing;Environmental Information Processing;Organismal Systems;Organismal Systems;Human Diseases;Organismal Systems;Organismal Systems;Organismal Systems;Organismal Systems;Or…	Signal transduction;Neurodegenerative diseases;Signal transduction;Cancers;Signal transduction;Transport and catabolism;Endocrine and metabolic diseases;Endocrine system;Signal transduction;Signal transduction;Nervous system;Endocrine system;Endocrine and metabolic diseases;Aging;Aging;Endocrine system;Aging;Endocrine system;Endocrine and metabolic diseases;Excretory system	K16172;K16172;K16172;K16172;K16172;K16172;K16172;K16172;K16172;K16172;K16172;K16172;K16172;K16172;K16172;K16172;K16172;K16172;K16172;K16172
ENSMUSG00000041961	1021	2092	2969	869	572	703	8.94	17.53	25.34	7.33	5.17	6.41	17.27	6.30333333333333	-1.45408122030032	7.47014516292188e-05	0.00328399876797487	Znrf3	Environmental Information Processing	Signal transduction	K16273
ENSMUSG00000040136	35	22	17	59	92	67	0.63	0.51	0.26	0.80	1.32	0.92	0.466666666666667	1.01333333333333	1.11864449649861	7.47962251206804e-05	0.00328399876797487	Abcc8	Organismal Systems;Environmental Information Processing;Human Diseases	Endocrine system;Membrane transport;Endocrine and metabolic diseases	K05032;K05032;K05032
ENSMUSG00000028859	205	190	348	112	43	31	3.14	2.88	5.17	1.73	0.71	0.51	3.73	0.983333333333333	-1.92342317672719	7.48966228843425e-05	0.00328399876797487	Csf3r	Human Diseases;Environmental Information Processing;Environmental Information Processing;Organismal Systems;Environmental Information Processing	Cancers;Signal transduction;Signaling molecules and interaction;Immune system;Signal transduction	K05061;K05061;K05061;K05061;K05061
ENSMUSG00000037953	745	381	405	921	1207	964	13.27	6.61	7.13	16.33	22.76	18.20	9.00333333333333	19.0966666666667	1.08478969792323	7.53536434414826e-05	0.00329603769678059	A4gnt	-	-	-
ENSMUSG00000026073	78	90	117	40	28	31	2.93	3.04	4.20	1.38	1.16	1.19	3.39	1.24333333333333	-1.44707214360227	7.64662382010555e-05	0.00332858456169173	Il1r2	Human Diseases;Environmental Information Processing;Human Diseases;Human Diseases;Organismal Systems;Human Diseases;Human Diseases	Cancers;Signaling molecules and interaction;Infectious diseases;Infectious diseases;Immune system;Cardiovascular diseases;Cancers	K04387;K04387;K04387;K04387;K04387;K04387;K04387
ENSMUSG00000026977	797	922	693	455	310	442	12.11	12.56	9.98	6.19	4.49	6.53	11.55	5.73666666666667	-1.00960825498437	7.84754687825194e-05	0.00337878569908201	Marchf7	-	-	-
ENSMUSG00000014725	15	161	263	23	13	6	0.37	3.40	5.86	0.43	0.48	0.18	3.21	0.363333333333333	-3.14320766306653	7.85177086631697e-05	0.00337878569908201	Adam28	-	-	-
ENSMUSG00000025804	356	320	345	204	101	110	6.17	5.41	5.91	3.52	1.85	2.02	5.83	2.46333333333333	-1.2428840197755	7.85546633608883e-05	0.00337878569908201	Ccr1	Environmental Information Processing;Human Diseases;Human Diseases;Organismal Systems;Environmental Information Processing	Signaling molecules and interaction;Infectious diseases;Infectious diseases;Immune system;Signaling molecules and interaction	K04176;K04176;K04176;K04176;K04176
ENSMUSG00000035476	304	414	326	180	113	176	2.56	3.11	2.49	1.38	0.92	1.59	2.72	1.29666666666667	-1.0687989969853	8.1984971693517e-05	0.00350374289835841	Tab3	Human Diseases;Environmental Information Processing;Human Diseases;Human Diseases;Organismal Systems;Environmental Information Processing;Organismal Systems	Infectious diseases;Signal transduction;Infectious diseases;Infectious diseases;Immune system;Signal transduction;Immune system	K12793;K12793;K12793;K12793;K12793;K12793;K12793
ENSMUSG00000001604	599	396	300	745	964	795	23.77	15.27	11.77	29.29	40.07	33.34	16.9366666666667	34.2333333333333	1.01525181240784	8.20416964298704e-05	0.00350374289835841	Tcea3	-	-	-
ENSMUSG00000062327	265	433	605	174	53	136	8.56	14.46	18.64	4.96	1.91	4.60	13.8866666666667	3.82333333333333	-1.86079744802483	8.55341188996251e-05	0.00362716868056743	T	-	-	-
ENSMUSG00000041886	157	161	149	65	27	64	1.79	1.95	1.75	0.78	0.36	0.77	1.83	0.636666666666667	-1.52323351096945	8.70252174415185e-05	0.00367315549785288	Macc1	-	-	-
ENSMUSG00000055945	323	728	1110	285	144	206	4.87	10.63	16.41	4.26	2.30	3.26	10.6366666666667	3.27333333333333	-1.70021367896462	8.75067117358083e-05	0.00367905579077414	Prr18	-	-	-
ENSMUSG00000055748	8350	7963	3255	10527	16770	18107	196.73	182.78	75.80	246.78	418.22	452.08	151.77	372.36	1.29481145772145	8.75977059151739e-05	0.00367905579077414	Gsdmc4	-	-	-
ENSMUSG00000031617	179	354	310	134	52	81	3.28	6.33	5.66	2.55	1.01	1.57	5.09	1.71	-1.5736693311898	9.02595816132819e-05	0.00372269256128753	Tmem184c	-	-	-
ENSMUSG00000045288	27	60	59	12	7	2	0.40	0.87	0.87	0.18	0.11	0.03	0.713333333333333	0.106666666666667	-2.74146698640114	9.16687220349014e-05	0.00376870965210396	Ush1g	-	-	-
ENSMUSG00000069372	87	95	64	112	267	229	3.75	3.32	2.30	4.29	10.29	9.31	3.12333333333333	7.96333333333333	1.35028590079715	9.21691005585344e-05	0.00376870965210396	Ctxn3	-	-	-
ENSMUSG00000016349	41	63	51	67	262	175	0.97	1.45	1.19	1.57	6.54	4.37	1.20333333333333	4.16	1.78954719197508	9.22097794757791e-05	0.00376870965210396	Eef1a2	Human Diseases;Genetic Information Processing;Human Diseases	Infectious diseases;Translation;Infectious diseases	K03231;K03231;K03231
ENSMUSG00000053702	592	1197	1330	503	129	188	5.26	10.37	12.43	4.27	1.15	1.81	9.35333333333333	2.41	-1.95644745666878	9.3981540376101e-05	0.00381522815032419	Nebl	-	-	-
ENSMUSG00000023868	97	187	121	40	43	54	0.68	1.29	1.45	0.32	0.34	0.38	1.14	0.346666666666667	-1.7174127967448	9.61964464124211e-05	0.00389638745390221	Pde10a	Metabolism;Environmental Information Processing;Metabolism;Human Diseases	Global and overview maps;Signal transduction;Nucleotide metabolism;Substance dependence	K18438;K18438;K18438;K18438
ENSMUSG00000034684	1385	1920	2803	1093	836	672	26.60	33.57	49.72	19.70	15.55	12.14	36.63	15.7966666666667	-1.21340554079711	9.68224736722126e-05	0.00391297088789378	Sema3f	Organismal Systems	Development	K06840
ENSMUSG00000031636	1145	923	756	1113	2589	2321	35.07	27.54	22.88	33.91	83.94	75.34	28.4966666666667	64.3966666666667	1.17619283960402	9.74975282798926e-05	0.00393145725083987	Pdlim3	-	-	-
ENSMUSG00000011263	126	115	98	174	292	193	1.94	1.79	1.40	2.95	4.89	3.17	1.71	3.67	1.10178373795731	0.000103997212847384	0.00414726192072404	Exoc3l2	-	-	-
ENSMUSG00000038745	3034	1630	1139	4184	4231	4068	34.25	18.26	13.17	47.46	52.09	49.16	21.8933333333333	49.57	1.17897563241368	0.000104958256589001	0.00417636763277599	Nlrp6	Organismal Systems	Immune system	K20863
ENSMUSG00000109305	26	35	10	66	95	71	1.44	1.88	0.55	3.63	5.56	4.16	1.29	4.45	1.78643427043051	0.000106647216028494	0.00421264209776094	Smim38	-	-	-
ENSMUSG00000030793	2390	1587	1232	2794	3471	3119	110.58	68.72	59.43	123.65	188.81	171.22	79.5766666666667	161.226666666667	1.01867301002694	0.000118300040973903	0.0045277335597321	Pycard	Human Diseases;Human Diseases;Human Diseases;Organismal Systems;Human Diseases;Cellular Processes;Human Diseases;Organismal Systems;Human Diseases;Organismal Systems;Human Diseases	Infectious diseases;Infectious diseases;Infectious diseases;Immune system;Infectious diseases;Cell growth and death;Infectious disease: bacterial;Immune system;Infectious diseases;Immune system;Infectious diseases	K12799;K12799;K12799;K12799;K12799;K12799;K12799;K12799;K12799;K12799;K12799
ENSMUSG00000051397	1291	1060	1114	645	168	262	36.55	29.24	31.18	18.17	5.04	7.86	32.3233333333333	10.3566666666667	-1.64201624248411	0.000119747277775452	0.0045637860190159	Tacstd2	-	-	-
ENSMUSG00000005800	14	46	104	8	1	0	0.28	0.91	2.08	0.16	0.02	0.00	1.09	0.06	-4.18322182405577	0.000120115774304999	0.00456819255330485	Mmp8	-	-	-
ENSMUSG00000028347	529	953	872	449	211	241	13.62	23.08	20.92	11.53	5.45	6.49	19.2066666666667	7.82333333333333	-1.2957518186367	0.000124646149097462	0.00467255621310838	Tmeff1	-	-	-
ENSMUSG00000020120	283	419	369	206	104	88	3.39	4.89	4.40	2.46	1.32	1.14	4.22666666666667	1.64	-1.36582452480017	0.000124670472998519	0.00467255621310838	Plek	-	-	-
ENSMUSG00000034177	2882	4077	4928	2369	1394	1787	34.09	47.38	57.84	28.18	17.60	22.53	46.4366666666667	22.77	-1.02813012439678	0.000129317091321305	0.00479091849177629	Rnf43	Environmental Information Processing	Signal transduction	K15694
ENSMUSG00000039252	548	301	518	220	191	129	4.29	2.30	4.01	1.71	1.58	1.07	3.53333333333333	1.45333333333333	-1.28166422467364	0.000129395796031993	0.00479091849177629	Lgi2	-	-	-
ENSMUSG00000029238	1300	2307	1955	1112	738	731	7.96	14.21	12.17	6.73	4.66	4.65	11.4466666666667	5.34666666666667	-1.09821589754722	0.000129537556881991	0.00479091849177629	Clock	Organismal Systems;Organismal Systems;Organismal Systems	Nervous system;Environmental adaptation;Environmental adaptation	K02223;K02223;K02223
ENSMUSG00000021032	20	10	8	27	66	75	0.61	0.30	0.26	0.82	2.18	2.42	0.39	1.80666666666667	2.21178432177047	0.000129706663978699	0.00479091849177629	Ngb	-	-	-
ENSMUSG00000048960	429	718	1354	381	169	158	2.89	3.93	5.95	1.84	0.80	1.12	4.25666666666667	1.25333333333333	-1.76395395802509	0.000129950183280951	0.00479091849177629	Prex2	-	-	-
ENSMUSG00000020982	523	778	530	352	209	277	5.43	7.95	5.44	3.71	2.30	3.05	6.27333333333333	3.02	-1.0546836726823	0.00013137479678083	0.00482385481210257	Nemf	-	-	-
ENSMUSG00000027660	1714	2614	2136	1369	676	725	14.74	25.16	20.53	10.91	6.10	5.71	20.1433333333333	7.57333333333333	-1.41130210719499	0.000132008247422542	0.00482385481210257	Skil	Cellular Processes	Cellular community - eukaryotes	K18499
ENSMUSG00000030786	494	568	576	337	146	149	5.35	5.84	7.40	3.52	1.63	1.66	6.19666666666667	2.27	-1.44880006690741	0.000132236099595377	0.00482385481210257	Itgam	Human Diseases;Cellular Processes;Human Diseases;Human Diseases;Environmental Information Processing;Human Diseases;Cellular Processes;Organismal Systems;Environmental Information Processing;Human Diseases;Organismal Systems;Organismal Systems;Human Diseases;Human Diseases;Human Diseases	Cancers;Transport and catabolism;Infectious diseases;Infectious diseases;Signal transduction;Infectious diseases;Cell motility;Immune system;Signaling molecules and interaction;Infectious diseases;Immune system;Immune system;Infectious diseases;Cancers;Infectious diseases	K06461;K06461;K06461;K06461;K06461;K06461;K06461;K06461;K06461;K06461;K06461;K06461;K06461;K06461;K06461
ENSMUSG00000019817	292	757	576	264	133	141	2.92	8.67	6.13	2.78	1.58	1.47	5.90666666666667	1.94333333333333	-1.60381081535452	0.000133246806047007	0.00482385481210257	Plagl1	-	-	-
ENSMUSG00000016526	298	409	606	199	106	184	5.05	6.19	9.30	3.07	1.74	3.03	6.84666666666667	2.61333333333333	-1.38951062220299	0.000135168820801445	0.00486419272465757	Dyrk3	-	-	-
ENSMUSG00000032387	91	117	112	131	318	285	2.25	3.02	2.76	3.24	8.37	7.53	2.67666666666667	6.38	1.25311893696871	0.000137838235186653	0.00494196688676221	Rbpms2	-	-	-
ENSMUSG00000032717	193	259	308	131	95	117	8.33	8.76	9.86	4.25	3.25	3.99	8.98333333333333	3.83	-1.22990647499375	0.000137877183001835	0.00494196688676221	Mdfi	-	-	-
ENSMUSG00000041836	703	1031	951	537	245	356	7.30	9.43	10.41	5.06	2.46	3.58	9.04666666666667	3.7	-1.28986104418139	0.000140232670005705	0.00500652803093492	Ptpre	-	-	-
ENSMUSG00000020439	1638	1536	1410	1708	3898	3144	25.35	23.80	21.84	26.35	65.09	51.95	23.6633333333333	47.7966666666667	1.01425669524866	0.000143494771950464	0.00508441086175212	Smtn	-	-	-
ENSMUSG00000032769	76	48	134	27	8	17	0.88	0.54	1.55	0.31	0.10	0.21	0.99	0.206666666666667	-2.26012281041389	0.000143598449821259	0.00508441086175212	Trpa1	Organismal Systems	Sensory system	K04984
ENSMUSG00000035200	216	134	121	247	403	324	2.85	1.72	1.58	3.24	5.63	4.53	2.05	4.46666666666667	1.12357468511853	0.000144291133143695	0.00508441086175212	Chrnb4	Environmental Information Processing;Organismal Systems	Signaling molecules and interaction;Nervous system	K04815;K04815
ENSMUSG00000004319	2740	4677	3576	2220	1359	1671	26.37	42.66	33.58	20.55	13.44	16.13	34.2033333333333	16.7066666666667	-1.03371301787223	0.000146020262305108	0.00510223605133807	Clcn3	-	-	-
ENSMUSG00000022218	124	86	72	40	23	19	2.30	1.71	1.25	0.72	0.44	0.36	1.75333333333333	0.506666666666667	-1.79099147584871	0.000147639755230703	0.00513894446674884	Tgm1	-	-	-
ENSMUSG00000023336	211	145	184	277	591	306	7.56	5.06	6.52	9.88	23.06	11.62	6.38	14.8533333333333	1.219158402854	0.000148550662430941	0.00515225332243121	Wfdc1	-	-	-
ENSMUSG00000021720	517	1101	729	416	187	254	11.87	24.21	16.46	9.18	4.04	5.48	17.5133333333333	6.23333333333333	-1.49037793035863	0.000148592525933388	0.00515225332243121	Rnf180	-	-	-
ENSMUSG00000049241	45	52	36	74	169	99	0.67	0.76	0.53	1.10	2.68	1.57	0.653333333333333	1.78333333333333	1.4486852371733	0.000151196597164055	0.00522249814104906	Hcar1	Environmental Information Processing	Signal transduction	K08401
ENSMUSG00000076550	53	147	39	1	16	1	7.43	20.21	5.87	0.14	2.39	0.18	11.17	0.903333333333333	-3.6282269298506	0.000154899669063336	0.00533002385072221	Igkv4-63	-	-	-
ENSMUSG00000051510	1971	2503	3322	1535	987	1260	25.29	30.84	44.11	19.81	11.86	16.43	33.4133333333333	16.0333333333333	-1.05934952066446	0.000155195142548188	0.00533003849835175	Mafg	-	-	-
ENSMUSG00000028965	135	210	316	94	44	73	4.03	6.03	9.38	3.32	1.58	2.56	6.48	2.48666666666667	-1.38178068335054	0.000158204869166415	0.0054128237907032	Tnfrsf9	Environmental Information Processing	Signaling molecules and interaction	K05146
ENSMUSG00000030218	2102	3113	6717	1692	1219	1190	167.35	241.46	528.59	134.03	102.73	100.40	312.466666666667	112.386666666667	-1.47523140689005	0.000166182849815617	0.00555943181836874	Mgp	-	-	-
ENSMUSG00000034218	527	776	672	419	254	248	2.64	3.79	3.32	2.09	1.35	1.32	3.25	1.58666666666667	-1.03444064532903	0.00017050486252322	0.00567250523293181	Atm	Human Diseases;Human Diseases;Human Diseases;Human Diseases;Environmental Information Processing;Human Diseases;Cellular Processes;Human Diseases;Cellular Processes;Environmental Information Processing;Cellular Processes;Human Diseases;Cellular Processes;Cellular Processes;Genetic Information Processing	Infectious diseases;Cancers;Infectious disease: viral;Infectious diseases;Signal transduction;Infectious diseases;Cell growth and death;Cancers;Cell growth and death;Signal transduction;Cell growth and death;Drug resistance;Cell growth and death;Cell growth and death;Replication and repair	K04728;K04728;K04728;K04728;K04728;K04728;K04728;K04728;K04728;K04728;K04728;K04728;K04728;K04728;K04728
ENSMUSG00000095761	38	8	48	4	1	1	5.32	1.09	6.64	0.56	0.15	0.15	4.35	0.286666666666667	-3.92356933675515	0.000171659255551777	0.00570041259474788	Ighv1-20	Environmental Information Processing;Human Diseases;Environmental Information Processing;Human Diseases;Human Diseases;Cellular Processes;Human Diseases;Human Diseases;Human Diseases;Environmental Information Processing;Environmental Information Processing;Human Diseases;Human Diseases;Human Diseases;Human Diseases;Organismal Systems;Human Diseases;Organismal Systems;Human Diseases;Organismal Sys…	Signal transduction;Infectious diseases;Signal transduction;Cancers;Infectious diseases;Transport and catabolism;Infectious diseases;Immune diseases;Infectious diseases;Signal transduction;Signal transduction;Immune diseases;Cardiovascular diseases;Immune diseases;Infectious diseases;Immune system;Immune diseases;Immune system;Cardiovascular diseases;Immune system;Immune system;Immune system;Infe…	K06856;K06856;K06856;K06856;K06856;K06856;K06856;K06856;K06856;K06856;K06856;K06856;K06856;K06856;K06856;K06856;K06856;K06856;K06856;K06856;K06856;K06856;K06856;K06856;K06856;K06856;K06856
ENSMUSG00000022687	587	429	319	602	1086	975	6.48	4.61	3.48	6.61	12.69	11.40	4.85666666666667	10.2333333333333	1.07523777819302	0.000174406176767682	0.00577041681924574	Boc	Organismal Systems;Environmental Information Processing	Development;Signal transduction	K20020;K20020
ENSMUSG00000024395	241	217	224	268	727	494	6.99	5.96	6.28	7.29	20.93	14.24	6.41	14.1533333333333	1.14274560856548	0.000175618007770824	0.00579014953101487	Lims2	-	-	-
ENSMUSG00000051043	150	272	158	88	74	51	2.14	3.93	2.75	1.26	1.12	0.76	2.94	1.04666666666667	-1.49001409666589	0.000175643617104686	0.00579014953101487	Gprc5c	-	-	-
ENSMUSG00000055639	312	751	645	291	150	154	3.02	7.08	6.16	2.80	1.53	1.58	5.42	1.97	-1.4600972218975	0.00018197538847785	0.00593825917677787	Dach1	-	-	-
ENSMUSG00000004038	868	435	227	1138	1588	1271	32.53	15.89	8.41	42.44	62.99	50.47	18.9433333333333	51.9666666666667	1.45589630753382	0.000182108806196233	0.00593825917677787	Gstm3	Metabolism;Human Diseases;Human Diseases;Human Diseases;Human Diseases;Metabolism;Organismal Systems;Metabolism;Human Diseases;Metabolism;Metabolism	Global and overview maps;Cancers;Cancers;Cardiovascular diseases;Cancers;Xenobiotics biodegradation and metabolism;Aging;Xenobiotics biodegradation and metabolism;Drug resistance;Xenobiotics biodegradation and metabolism;Metabolism of other amino acids	K00799;K00799;K00799;K00799;K00799;K00799;K00799;K00799;K00799;K00799;K00799
ENSMUSG00000032648	75	67	65	95	216	159	1.28	1.12	1.10	1.62	3.91	2.90	1.16666666666667	2.81	1.26817770910975	0.000183629983400491	0.00595561158012544	Pygm	Metabolism;Cellular Processes;Organismal Systems;Human Diseases;Organismal Systems;Metabolism	Global and overview maps;Cell growth and death;Endocrine system;Endocrine and metabolic diseases;Endocrine system;Carbohydrate metabolism	K00688;K00688;K00688;K00688;K00688;K00688
ENSMUSG00000040433	1053	1868	1516	895	473	571	8.28	13.77	10.72	6.49	3.58	4.20	10.9233333333333	4.75666666666667	-1.19939033806699	0.000189563688810639	0.00606258582513516	Zbtb38	-	-	-
ENSMUSG00000027692	894	1030	1051	671	365	424	6.99	7.32	8.09	5.10	2.66	3.14	7.46666666666667	3.63333333333333	-1.03917059728068	0.000191622381048708	0.00610521748438257	Tnik	Environmental Information Processing	Signal transduction	K08840
ENSMUSG00000020183	578	733	1168	446	303	217	5.47	6.75	10.92	4.20	3.03	2.17	7.71333333333333	3.13333333333333	-1.29965620254249	0.000192972078280981	0.00612660912855172	Cpm	-	-	-
ENSMUSG00000036676	413	728	660	330	218	277	3.45	6.72	7.34	3.60	1.89	2.67	5.83666666666667	2.72	-1.10153802646206	0.00019588742201306	0.00619509958686965	Tmtc3	-	-	-
ENSMUSG00000026424	42	25	29	46	143	119	0.91	0.53	0.62	0.99	3.28	2.73	0.686666666666667	2.33333333333333	1.76471058464911	0.000197264706831268	0.00619854253156099	Gpr37l1	-	-	-
ENSMUSG00000068882	926	1535	1084	664	395	583	26.39	38.67	27.05	16.44	10.56	15.73	30.7033333333333	14.2433333333333	-1.10810847520686	0.000198634697664475	0.00619854253156099	Ssb	Human Diseases	Immune diseases	K11090
ENSMUSG00000026020	601	899	886	447	279	416	28.07	36.95	39.37	18.90	14.51	18.62	34.7966666666667	17.3433333333333	-1.00456790368172	0.000198669035470457	0.00619854253156099	Nop58	Genetic Information Processing	Translation	K14565
ENSMUSG00000073400	64	154	99	34	3	13	1.40	3.28	2.14	0.74	0.07	0.30	2.27333333333333	0.37	-2.61921206267406	0.00019933734957544	0.006208671069104	Trim10	-	-	-
ENSMUSG00000025531	231	429	250	156	98	109	2.33	4.22	2.50	1.57	1.07	1.17	3.01666666666667	1.27	-1.24812679447725	0.000200300793520297	0.00622566750460448	Chm	-	-	-
ENSMUSG00000017737	746	1510	3034	441	167	243	11.54	22.76	46.40	6.79	2.74	3.98	26.9	4.50333333333333	-2.57854099883946	0.000206426559847389	0.00631805393070782	Mmp9	Human Diseases;Human Diseases;Human Diseases;Human Diseases;Human Diseases;Human Diseases;Organismal Systems;Organismal Systems;Environmental Information Processing;Organismal Systems;Human Diseases;Organismal Systems;Human Diseases;Human Diseases	Cancers;Cancers;Cancers;Infectious diseases;Cancers;Cardiovascular diseases;Endocrine system;Endocrine system;Signal transduction;Immune system;Cancers;Immune system;Drug resistance;Cancers	K01403;K01403;K01403;K01403;K01403;K01403;K01403;K01403;K01403;K01403;K01403;K01403;K01403;K01403
ENSMUSG00000026970	782	1175	992	609	345	464	10.55	16.26	14.07	8.45	4.72	6.52	13.6266666666667	6.56333333333333	-1.05393208503607	0.000206696367176768	0.00631805393070782	Rbms1	-	-	-
ENSMUSG00000040147	249	169	142	276	493	365	5.07	3.35	2.86	5.60	10.63	7.88	3.76	8.03666666666667	1.09586458320373	0.000207144088625566	0.00632104385307575	Maob	Metabolism;Human Diseases;Organismal Systems;Organismal Systems;Metabolism;Human Diseases;Metabolism;Metabolism;Human Diseases;Metabolism;Metabolism;Metabolism;Metabolism	Global and overview maps;Substance dependence;Nervous system;Nervous system;Xenobiotics biodegradation and metabolism;Substance dependence;Amino acid metabolism;Amino acid metabolism;Substance dependence;Amino acid metabolism;Amino acid metabolism;Amino acid metabolism;Amino acid metabolism	K00274;K00274;K00274;K00274;K00274;K00274;K00274;K00274;K00274;K00274;K00274;K00274;K00274
ENSMUSG00000032496	143	406	218	95	11	21	4.49	9.03	5.03	2.12	0.87	0.89	6.18333333333333	1.29333333333333	-2.25729062932104	0.000207983314006486	0.00633595036682491	Ltf	-	-	-
ENSMUSG00000030510	185	239	367	115	45	98	2.80	3.84	6.03	1.73	0.72	1.57	4.22333333333333	1.34	-1.65614911796188	0.000209047998628297	0.00635766345996663	Cers3	Metabolism;Environmental Information Processing;Metabolism	Global and overview maps;Signal transduction;Lipid metabolism	K04710;K04710;K04710
ENSMUSG00000081683	248	151	296	105	59	91	3.75	2.22	4.42	1.58	0.94	1.46	3.46333333333333	1.32666666666667	-1.38435531836056	0.000210421759142768	0.00638868752758673	Fzd10	Human Diseases;Human Diseases;Human Diseases;Human Diseases;Human Diseases;Environmental Information Processing;Human Diseases;Environmental Information Processing;Environmental Information Processing;Human Diseases;Human Diseases;Cellular Processes;Organismal Systems;Human Diseases	Cancers;Infectious diseases;Neurodegenerative diseases;Cancers;Cancers;Signal transduction;Endocrine and metabolic diseases;Signal transduction;Signal transduction;Cancers;Cancers;Cellular community - eukaryotes;Endocrine system;Cancers	K02842;K02842;K02842;K02842;K02842;K02842;K02842;K02842;K02842;K02842;K02842;K02842;K02842;K02842
ENSMUSG00000047990	42	27	44	61	148	99	1.48	0.93	1.53	2.14	5.52	3.69	1.31333333333333	3.78333333333333	1.5264247627219	0.00021134989636056	0.00640610046602938	C2cd4a	-	-	-
ENSMUSG00000033906	355	1017	1031	372	200	210	3.17	8.83	9.09	3.30	1.89	1.98	7.03	2.39	-1.55651407109179	0.000216812581247399	0.00652102305262116	Zdhhc15	-	-	-
ENSMUSG00000006205	3280	6862	6035	3058	1806	2123	78.94	160.90	143.57	73.23	46.01	54.15	127.803333333333	57.7966666666667	-1.14486726973946	0.000224887093347787	0.00665470496397973	Htra1	-	-	-
ENSMUSG00000032816	641	370	272	763	879	946	5.06	2.85	2.12	5.99	7.35	7.92	3.34333333333333	7.08666666666667	1.08381999091893	0.000225374947282538	0.00665470496397973	Igdcc4	-	-	-
ENSMUSG00000066363	94	116	42	21	12	26	2.09	2.47	0.91	0.46	0.31	0.66	1.82333333333333	0.476666666666667	-1.93552568601416	0.00022821265679344	0.0067035148698756	Serpina3f	-	-	-
ENSMUSG00000043467	279	456	326	207	109	124	1.04	2.50	1.28	1.04	0.53	0.63	1.60666666666667	0.733333333333333	-1.13152962270531	0.000234598227725803	0.00679779276462461	Zbtb37	-	-	-
ENSMUSG00000021850	24	14	4	76	55	45	1.19	0.84	0.24	4.00	2.67	2.75	0.756666666666666	3.14	2.05303476232187	0.000234780378822096	0.00679779276462461	ccdc198	-	-	-
ENSMUSG00000096515	195	101	50	12	23	33	27.14	13.69	6.88	1.66	3.39	4.87	15.9033333333333	3.30666666666667	-2.26587966059743	0.000234855240349603	0.00679779276462461	Igkv14-100	-	-	-
ENSMUSG00000051236	908	1810	1926	796	627	635	12.21	22.95	24.33	10.12	8.48	8.60	19.83	9.06666666666667	-1.1290405268123	0.000234940632093115	0.00679779276462461	Msrb3	-	-	-
ENSMUSG00000032691	86	74	69	33	12	22	1.07	1.37	0.85	0.41	0.16	0.29	1.09666666666667	0.286666666666667	-1.93567901903315	0.000235185191137026	0.00679779276462461	Nlrp3	Human Diseases;Human Diseases;Human Diseases;Organismal Systems;Human Diseases;Cellular Processes;Human Diseases;Organismal Systems;Human Diseases	Infectious diseases;Infectious diseases;Infectious diseases;Immune system;Infectious diseases;Cell growth and death;Infectious disease: bacterial;Immune system;Infectious diseases	K12800;K12800;K12800;K12800;K12800;K12800;K12800;K12800;K12800
ENSMUSG00000029223	201	193	178	222	689	416	8.39	7.85	7.34	9.22	30.44	18.40	7.86	19.3533333333333	1.2999808536469	0.000243301382861225	0.00697542273782856	Uchl1	Human Diseases	Neurodegenerative diseases	K05611
ENSMUSG00000044165	38	78	28	13	7	4	1.93	3.59	1.41	0.73	0.39	0.21	2.31	0.443333333333333	-2.38142910663603	0.000244235316724568	0.00697542273782856	Bcl2l15	-	-	-
ENSMUSG00000062380	94	92	99	114	306	236	2.47	2.36	2.57	2.98	8.52	6.58	2.46666666666667	6.02666666666667	1.28879750189887	0.00024519199770391	0.00697542273782856	Tubb3	Human Diseases;Human Diseases;Cellular Processes;Human Diseases;Cellular Processes	Infectious diseases;Neurodegenerative diseases;Transport and catabolism;Neurodegenerative diseases;Cellular community - eukaryotes	K07375;K07375;K07375;K07375;K07375
ENSMUSG00000035095	178	100	164	72	41	39	2.07	1.13	1.88	0.83	0.50	0.48	1.69333333333333	0.603333333333333	-1.48883879968896	0.000246162221642422	0.00699201341819237	Fam167a	-	-	-
ENSMUSG00000037095	1620	2153	635	699	298	319	56.52	73.18	21.90	24.26	11.01	11.79	50.5333333333333	15.6866666666667	-1.68769652783415	0.000251885339133388	0.00709246891728162	Lrg1	-	-	-
ENSMUSG00000051228	13	30	60	5	3	0	0.12	0.28	0.56	0.05	0.03	0.00	0.32	0.0266666666666667	-3.58496250072115	0.000252054527810396	0.00709246891728162	Nyx	-	-	-
ENSMUSG00000092232	5	16	17	0	0	0	0.18	0.60	0.66	0.00	0.00	0.00	0.48	0.001	-8.90689059560852	0.000253429357168373	0.00711887217239368	Gm20521	Human Diseases;Genetic Information Processing	Infectious diseases;Translation	K14396;K14396
ENSMUSG00000035021	931	1620	1465	815	510	574	8.04	13.36	16.46	6.87	4.91	5.39	12.62	5.72333333333333	-1.14078437170157	0.000253780995240605	0.00711887217239368	Baz1a	-	-	-
ENSMUSG00000022534	58	60	81	26	16	22	1.03	1.02	1.37	0.44	0.29	0.39	1.14	0.373333333333333	-1.6104975928283	0.000254513165090073	0.00712834159279405	Mefv	Organismal Systems;Human Diseases	Immune system;Infectious disease: bacterial	K12803;K12803
ENSMUSG00000076549	214	110	518	99	19	19	26.70	13.40	63.86	12.28	2.51	2.51	34.6533333333333	5.76666666666667	-2.58718459594811	0.000260865371697911	0.00727242737611539	Igkv4-68	-	-	-
ENSMUSG00000024737	325	312	321	199	115	88	6.81	6.37	6.65	4.15	2.55	1.95	6.61	2.88333333333333	-1.19691263970476	0.000262960954168235	0.00730829174930642	Slc15a3	-	-	-
ENSMUSG00000095565	167	58	121	37	18	34	22.23	7.52	15.92	4.90	2.54	4.80	15.2233333333333	4.08	-1.8996432316857	0.000264984013472289	0.00734192669229586	Ighv2-9-1	Environmental Information Processing;Human Diseases;Environmental Information Processing;Human Diseases;Human Diseases;Cellular Processes;Human Diseases;Human Diseases;Human Diseases;Environmental Information Processing;Environmental Information Processing;Human Diseases;Human Diseases;Human Diseases;Human Diseases;Organismal Systems;Human Diseases;Organismal Systems;Human Diseases;Organismal Sys…	Signal transduction;Infectious diseases;Signal transduction;Cancers;Infectious diseases;Transport and catabolism;Infectious diseases;Immune diseases;Infectious diseases;Signal transduction;Signal transduction;Immune diseases;Cardiovascular diseases;Immune diseases;Infectious diseases;Immune system;Immune diseases;Immune system;Cardiovascular diseases;Immune system;Immune system;Immune system;Infe…	K06856;K06856;K06856;K06856;K06856;K06856;K06856;K06856;K06856;K06856;K06856;K06856;K06856;K06856;K06856;K06856;K06856;K06856;K06856;K06856;K06856;K06856;K06856;K06856;K06856;K06856;K06856
ENSMUSG00000003617	622	994	877	452	113	106	8.32	14.63	11.53	6.32	2.16	2.43	11.4933333333333	3.63666666666667	-1.66010867276549	0.000266283322321656	0.0073456331469604	Cp	Metabolism;Cellular Processes	Metabolism of cofactors and vitamins;Cell growth and death	K13624;K13624
ENSMUSG00000059824	798	761	251	1107	1665	1518	23.32	21.74	7.07	31.84	52.32	46.74	17.3766666666667	43.6333333333333	1.32827933223659	0.000266337653543264	0.0073456331469604	Dbp	-	-	-
ENSMUSG00000038301	446	733	455	304	174	240	9.22	15.26	10.50	6.14	3.67	5.53	11.66	5.11333333333333	-1.18923180641872	0.000268881541477605	0.00738198335378865	Snx10	-	-	-
ENSMUSG00000008090	1925	2907	3875	1601	1038	1350	54.22	82.22	108.91	45.25	28.77	38.80	81.7833333333333	37.6066666666667	-1.12081842935072	0.000270818431344982	0.00740503145469264	Fgfrl1	-	-	-
ENSMUSG00000040703	1290	996	489	2086	1660	1809	23.00	17.30	8.62	37.07	31.41	34.25	16.3066666666667	34.2433333333333	1.07036124104242	0.000270950777279371	0.00740503145469264	Cyp2s1	Metabolism;Metabolism;Metabolism	Global and overview maps;Metabolism of cofactors and vitamins;Xenobiotics biodegradation and metabolism	K07420;K07420;K07420
ENSMUSG00000029763	1698	3160	3293	1602	959	1017	17.55	31.81	33.79	16.51	10.62	11.04	27.7166666666667	12.7233333333333	-1.12327707695908	0.000273071119639257	0.00742463864760764	Exoc4	Human Diseases	Infectious diseases	K06111
ENSMUSG00000049303	214	313	287	152	78	119	2.94	4.18	3.89	2.07	1.13	1.74	3.67	1.64666666666667	-1.15623152197969	0.000274739340582742	0.00745220148292378	Syt12	-	-	-
ENSMUSG00000022708	517	560	681	361	236	319	1.18	1.64	2.34	0.66	0.96	0.70	1.72	0.773333333333333	-1.15324626029568	0.000275155892588717	0.0074523106441007	Zbtb20	-	-	-
ENSMUSG00000020297	81	70	87	102	257	185	1.79	1.50	1.89	2.23	5.98	4.32	1.72666666666667	4.17666666666667	1.2743624116353	0.000277024206990356	0.00747883825679946	Nsg2	-	-	-
ENSMUSG00000021822	956	537	895	374	410	286	20.05	10.97	18.56	7.81	9.10	6.36	16.5266666666667	7.75666666666667	-1.09128706068138	0.000277183546705638	0.00747883825679946	Plau	Human Diseases;Environmental Information Processing;Human Diseases;Human Diseases;Human Diseases;Organismal Systems	Cancers;Signal transduction;Cancers;Cancers;Cancers;Immune system	K01348;K01348;K01348;K01348;K01348;K01348
ENSMUSG00000035164	91	273	236	79	58	42	0.68	2.02	1.71	0.57	0.45	0.35	1.47	0.456666666666667	-1.68660276259699	0.000277377339167209	0.00747883825679946	Zc3h12c	-	-	-
ENSMUSG00000047501	6456	6578	8862	4296	1363	2682	174.64	173.35	236.94	115.62	39.03	76.88	194.976666666667	77.1766666666667	-1.33706484449782	0.00028489787278344	0.0075797939202251	Cldn4	Human Diseases;Environmental Information Processing;Cellular Processes;Human Diseases;Organismal Systems	Infectious diseases;Signaling molecules and interaction;Cellular community - eukaryotes;Infectious diseases;Immune system	K06087;K06087;K06087;K06087;K06087
ENSMUSG00000022790	134	350	442	105	86	107	2.30	6.20	8.14	1.97	1.30	1.66	5.54666666666667	1.64333333333333	-1.75499588176318	0.000285337399331016	0.00758032370428649	Igsf11	Environmental Information Processing	Signaling molecules and interaction	K06791
ENSMUSG00000049470	3470	5289	4337	2908	1634	1910	18.84	28.36	24.53	15.10	9.36	9.85	23.91	11.4366666666667	-1.06394750487513	0.000291640609026787	0.00767326945754623	Aff4	-	-	-
ENSMUSG00000001663	290	197	101	375	749	375	14.02	9.09	4.73	17.95	38.25	18.82	9.28	25.0066666666667	1.43011605181274	0.000291809361601675	0.00767326945754623	Gstt1	Metabolism;Human Diseases;Human Diseases;Human Diseases;Human Diseases;Metabolism;Organismal Systems;Metabolism;Human Diseases;Metabolism;Metabolism	Global and overview maps;Cancers;Cancers;Cardiovascular diseases;Cancers;Xenobiotics biodegradation and metabolism;Aging;Xenobiotics biodegradation and metabolism;Drug resistance;Xenobiotics biodegradation and metabolism;Metabolism of other amino acids	K00799;K00799;K00799;K00799;K00799;K00799;K00799;K00799;K00799;K00799;K00799
ENSMUSG00000058447	9	11	13	0	0	0	0.18	0.23	0.27	0.00	0.00	0.00	0.226666666666667	0.001	-7.82442843541655	0.000298566459566827	0.0078281612366832	Gm26920	Human Diseases	Infectious diseases	K09228
ENSMUSG00000025019	461	746	496	342	216	236	5.31	7.29	4.76	3.34	2.27	2.49	5.78666666666667	2.7	-1.09977313467249	0.000302103394132729	0.00787038725237471	Lcor	-	-	-
ENSMUSG00000072693	1	0	0	39	47	0	0.07	0.00	0.00	3.17	3.99	0.00	0.0233333333333333	2.38666666666667	6.67646085520666	0.000302355314317634	0.00787038725237471	Gm10401	-	-	-
ENSMUSG00000032118	28	27	25	49	103	58	0.89	0.76	0.76	1.33	3.02	1.75	0.803333333333333	2.03333333333333	1.33977609622029	0.000321117779288222	0.00822835841537835	Fez1	-	-	-
ENSMUSG00000043760	285	213	346	162	88	101	1.08	0.79	1.30	0.61	0.35	0.41	1.05666666666667	0.456666666666667	-1.21030694717888	0.000323271731295898	0.00827181845022719	Pkhd1	-	-	-
ENSMUSG00000027761	321	260	141	449	594	403	11.91	9.40	5.17	16.58	23.33	15.85	8.82666666666667	18.5866666666667	1.07432743906121	0.000324174746449951	0.00828319207159599	Aadac	-	-	-
ENSMUSG00000048534	300	298	298	188	82	98	8.51	8.17	9.17	4.90	2.04	3.06	8.61666666666667	3.33333333333333	-1.37016428054021	0.000330063797369577	0.0083744417127548	Jaml	-	-	-
ENSMUSG00000042447	315	440	464	238	139	198	4.17	5.68	6.07	3.14	1.95	2.78	5.30666666666667	2.62333333333333	-1.01640479503617	0.000339501996591923	0.00857776722857775	Mios	Environmental Information Processing	Signal transduction	K20407
ENSMUSG00000024679	278	295	323	184	110	77	9.63	9.96	11.06	6.34	4.03	2.83	10.2166666666667	4.4	-1.21534914433233	0.00035010328719471	0.0087964059571244	Ms4a6d	-	-	-
ENSMUSG00000037035	315	488	628	266	180	180	3.64	5.49	7.17	3.06	2.20	2.20	5.43333333333333	2.48666666666667	-1.1276244288632	0.000363236756957276	0.00900119617892069	Inhbb	Environmental Information Processing;Cellular Processes;Environmental Information Processing	Signaling molecules and interaction;Cellular community - eukaryotes;Signal transduction	K22687;K22687;K22687
ENSMUSG00000033576	151	157	80	233	218	298	3.22	3.27	1.70	5.27	4.94	6.72	2.73	5.64333333333333	1.04764661625463	0.000367915405038122	0.00902988305973559	Apol6	-	-	-
ENSMUSG00000033904	173	246	177	116	67	60	2.38	3.06	2.15	1.40	0.86	0.76	2.53	1.00666666666667	-1.32955133609038	0.000368721850300145	0.00902988305973559	Ccp110	-	-	-
ENSMUSG00000063663	452	860	678	365	160	268	2.44	4.23	3.52	1.63	0.82	1.40	3.39666666666667	1.28333333333333	-1.40422370058356	0.000369109924391423	0.00902988305973559	Brwd3	-	-	-
ENSMUSG00000073490	77	127	99	45	40	30	1.11	1.78	1.40	0.64	0.61	0.46	1.43	0.57	-1.32698132261365	0.000371523321467521	0.00902988305973559	Ifi207	Organismal Systems	Immune system	K20914
ENSMUSG00000085139	30	86	359	27	14	26	0.31	0.87	3.70	0.28	0.15	0.29	1.62666666666667	0.24	-2.76081233612058	0.00037167393610941	0.00902988305973559	A730046J19Rik	-	-	-
ENSMUSG00000094356	53	103	121	33	28	28	7.04	13.28	15.88	4.36	3.94	3.94	12.0666666666667	4.08	-1.56438613927792	0.000374265606887791	0.00902988305973559	Igkv8-28	-	-	-
ENSMUSG00000037315	360	481	618	248	202	261	3.71	5.02	6.31	2.49	2.16	2.79	5.01333333333333	2.48	-1.01543004056961	0.00037448775860271	0.00902988305973559	Jade3	-	-	-
ENSMUSG00000093550	8	7	86	0	0	2	0.75	0.59	7.70	0.00	0.00	0.17	3.01333333333333	0.0566666666666667	-5.73271612116485	0.000374891353158134	0.00902988305973559	Higd1c	-	-	-
ENSMUSG00000029372	76	59	38	18	11	17	3.45	2.61	1.70	0.81	0.53	0.82	2.58666666666667	0.72	-1.84502534002366	0.000376765144573589	0.00906293253891062	Ppbp	Environmental Information Processing;Organismal Systems;Environmental Information Processing	Signaling molecules and interaction;Immune system;Signaling molecules and interaction	K10029;K10029;K10029
ENSMUSG00000020363	125	170	160	72	76	68	2.08	2.76	2.64	1.19	1.34	1.20	2.49333333333333	1.24333333333333	-1.0038626396324	0.000379285157897912	0.00911141805508748	Gfpt2	Metabolism;Human Diseases;Metabolism;Metabolism	Global and overview maps;Endocrine and metabolic diseases;Carbohydrate metabolism;Amino acid metabolism	K00820;K00820;K00820;K00820
ENSMUSG00000022883	1330	2218	4832	792	260	296	9.06	14.78	32.17	5.41	1.89	2.16	18.67	3.15333333333333	-2.56577233960796	0.000379913522025463	0.00911439279600264	Robo1	Organismal Systems	Development	K06753
ENSMUSG00000036403	128	213	127	73	63	56	1.14	1.84	1.13	0.64	0.61	0.54	1.37	0.596666666666667	-1.19917880641743	0.00038470399012337	0.00921707902066139	Cep135	-	-	-
ENSMUSG00000022840	343	332	301	355	818	689	2.40	2.27	2.09	2.48	6.07	5.12	2.25333333333333	4.55666666666667	1.01591809132388	0.00038760765431305	0.00924138392620078	Adcy5	Metabolism;Human Diseases;Human Diseases;Environmental Information Processing;Environmental Information Processing;Human Diseases;Organismal Systems;Environmental Information Processing;Human Diseases;Human Diseases;Organismal Systems;Environmental Information Processing;Human Diseases;Organismal Systems;Organismal Systems;Organismal Systems;Organismal Systems;Organismal Systems;Metabolism;Organi…	Global and overview maps;Cancers;Infectious diseases;Signal transduction;Signal transduction;Infectious diseases;Environmental adaptation;Signal transduction;Cardiovascular diseases;Substance dependence;Immune system;Signal transduction;Endocrine and metabolic diseases;Endocrine system;Nervous system;Circulatory system;Nervous system;Endocrine system;Nucleotide metabolism;Circulatory system;Signa…	K08045;K08045;K08045;K08045;K08045;K08045;K08045;K08045;K08045;K08045;K08045;K08045;K08045;K08045;K08045;K08045;K08045;K08045;K08045;K08045;K08045;K08045;K08045;K08045;K08045;K08045;K08045;K08045;K08045;K08045;K08045;K08045;K08045;K08045;K08045;K08045;K08045;K08045;K08045;K08045;K08045;K08045;K08045;K08045;K08045;K08045;K08045;K08045;K08045;K08045;K08045;K08045;K08045;K08045
ENSMUSG00000102440	63	72	81	23	13	31	0.65	0.73	0.83	0.24	0.14	0.34	0.736666666666667	0.24	-1.61797755794912	0.000388805997331353	0.00924138392620078	Pcdhga9	-	-	-
ENSMUSG00000027787	472	587	659	367	266	307	4.39	6.28	8.91	3.22	2.63	3.48	6.52666666666667	3.11	-1.06943177875194	0.000389274779546672	0.00924138392620078	Nmd3	Genetic Information Processing;Genetic Information Processing	Translation;Translation	K07562;K07562
ENSMUSG00000028382	4881	7251	5905	4018	2042	2656	40.72	59.37	51.20	30.45	16.97	22.04	50.43	23.1533333333333	-1.12306231529639	0.000389299372700736	0.00924138392620078	Ptbp3	-	-	-
ENSMUSG00000023064	78	96	71	101	336	187	4.50	5.39	4.05	5.79	20.51	11.43	4.64666666666667	12.5766666666667	1.43648153894169	0.000392617456180561	0.00925354336323521	Sncg	-	-	-
ENSMUSG00000039232	214	359	556	177	100	135	4.37	5.56	9.16	2.94	1.25	2.69	6.36333333333333	2.29333333333333	-1.47233663270184	0.000394202075219169	0.00927247459483631	Stx11	Genetic Information Processing	Folding, sorting and degradation	K08487
ENSMUSG00000039987	164	261	222	124	85	84	2.20	3.35	2.55	1.30	1.09	0.90	2.7	1.09666666666667	-1.29983432403674	0.000401410671230232	0.0093931136991893	Phtf2	-	-	-
ENSMUSG00000040998	416	645	416	288	234	202	5.19	7.32	5.00	3.26	2.89	2.36	5.83666666666667	2.83666666666667	-1.04094804674759	0.000403259794515391	0.00942417618100976	Npnt	Environmental Information Processing	Signaling molecules and interaction	K06824
ENSMUSG00000019768	249	616	991	274	135	140	2.20	5.63	8.66	2.29	1.19	1.16	5.49666666666667	1.54666666666667	-1.82939468830989	0.000404757708412554	0.00944696124350489	Esr1	Human Diseases;Human Diseases;Human Diseases;Organismal Systems;Organismal Systems;Human Diseases;Organismal Systems;Organismal Systems	Cancers;Cancers;Cancers;Endocrine system;Endocrine system;Drug resistance;Endocrine system;Excretory system	K08550;K08550;K08550;K08550;K08550;K08550;K08550;K08550
ENSMUSG00000040022	167	264	192	119	65	76	1.73	3.06	2.06	1.16	0.77	0.92	2.28333333333333	0.95	-1.26514206879578	0.00040820075714503	0.00949068276142953	Rab11fip2	Cellular Processes	Transport and catabolism	K12484
ENSMUSG00000056174	26	46	41	77	111	66	0.29	0.51	0.46	0.87	1.33	0.79	0.42	0.996666666666667	1.24672175069819	0.000408207058158358	0.00949068276142953	Col8a2	-	-	-
ENSMUSG00000076615	1160	221	691	262	135	153	52.57	9.57	30.92	11.41	6.36	7.09	31.02	8.28666666666667	-1.90433489070476	0.000411253677142922	0.00953696749369304	Ighg3	Environmental Information Processing;Human Diseases;Environmental Information Processing;Human Diseases;Human Diseases;Cellular Processes;Human Diseases;Human Diseases;Human Diseases;Environmental Information Processing;Environmental Information Processing;Human Diseases;Human Diseases;Human Diseases;Human Diseases;Organismal Systems;Human Diseases;Organismal Systems;Human Diseases;Organismal Sys…	Signal transduction;Infectious diseases;Signal transduction;Cancers;Infectious diseases;Transport and catabolism;Infectious diseases;Immune diseases;Infectious diseases;Signal transduction;Signal transduction;Immune diseases;Cardiovascular diseases;Immune diseases;Infectious diseases;Immune system;Immune diseases;Immune system;Cardiovascular diseases;Immune system;Immune system;Immune system;Infe…	K06856;K06856;K06856;K06856;K06856;K06856;K06856;K06856;K06856;K06856;K06856;K06856;K06856;K06856;K06856;K06856;K06856;K06856;K06856;K06856;K06856;K06856;K06856;K06856;K06856;K06856;K06856
ENSMUSG00000027985	476	857	889	414	240	327	7.18	12.53	12.83	6.00	4.09	5.53	10.8466666666667	5.20666666666667	-1.05881979753055	0.000412379601718221	0.00954924527234948	Lef1	Human Diseases;Human Diseases;Human Diseases;Environmental Information Processing;Human Diseases;Environmental Information Processing;Human Diseases;Human Diseases;Organismal Systems;Human Diseases;Human Diseases;Human Diseases;Human Diseases;Cellular Processes;Human Diseases;Human Diseases;Human Diseases	Cancers;Infectious diseases;Cancers;Signal transduction;Endocrine and metabolic diseases;Signal transduction;Cancers;Cancers;Endocrine system;Cancers;Cancers;Cardiovascular diseases;Cancers;Cellular community - eukaryotes;Cancers;Cancers;Cancers	K04492;K04492;K04492;K04492;K04492;K04492;K04492;K04492;K04492;K04492;K04492;K04492;K04492;K04492;K04492;K04492;K04492
ENSMUSG00000022650	2724	1568	563	4599	7364	8685	192.26	107.82	39.28	322.96	550.17	649.59	113.12	507.573333333333	2.1657622502265	0.000413660785475991	0.00954924527234948	Retnlb	-	-	-
ENSMUSG00000094075	43	252	36	23	10	2	6.02	34.36	4.98	3.20	1.48	0.30	15.12	1.66	-3.18720299287415	0.000413897539344016	0.00954924527234948	Ighv1-80	Environmental Information Processing;Human Diseases;Environmental Information Processing;Human Diseases;Human Diseases;Cellular Processes;Human Diseases;Human Diseases;Human Diseases;Environmental Information Processing;Environmental Information Processing;Human Diseases;Human Diseases;Human Diseases;Human Diseases;Organismal Systems;Human Diseases;Organismal Systems;Human Diseases;Organismal Sys…	Signal transduction;Infectious diseases;Signal transduction;Cancers;Infectious diseases;Transport and catabolism;Infectious diseases;Immune diseases;Infectious diseases;Signal transduction;Signal transduction;Immune diseases;Cardiovascular diseases;Immune diseases;Infectious diseases;Immune system;Immune diseases;Immune system;Cardiovascular diseases;Immune system;Immune system;Immune system;Infe…	K06856;K06856;K06856;K06856;K06856;K06856;K06856;K06856;K06856;K06856;K06856;K06856;K06856;K06856;K06856;K06856;K06856;K06856;K06856;K06856;K06856;K06856;K06856;K06856;K06856;K06856;K06856
ENSMUSG00000112023	69	99	58	33	18	21	2.36	3.26	1.91	1.19	0.75	0.88	2.51	0.94	-1.41695470227313	0.000421454391217246	0.00965686937023464	Lilr4b	Organismal Systems;Organismal Systems	Immune system;Development	K06512;K06512
ENSMUSG00000021572	170	392	487	144	110	128	2.92	5.65	6.80	2.33	2.21	2.09	5.12333333333333	2.21	-1.21303638957818	0.000442395294588676	0.010027441652126	Cep72	-	-	-
ENSMUSG00000020793	10	14	10	30	34	38	0.25	0.35	0.25	0.76	0.91	1.02	0.283333333333333	0.896666666666667	1.66207142641892	0.000443354484887999	0.0100365899367189	Galr2	Environmental Information Processing	Signaling molecules and interaction	K04231
ENSMUSG00000069892	163	210	98	75	47	47	1.81	1.74	1.04	0.84	0.42	0.53	1.53	0.596666666666667	-1.35853456614955	0.000449387751694055	0.0101477371679414	9930111J21Rik2	-	-	-
ENSMUSG00000092083	37	115	65	20	20	8	0.22	0.55	0.32	0.09	0.17	0.04	0.363333333333333	0.1	-1.86129372916841	0.000450100416029405	0.0101511410930976	Kcnb2	-	-	-
ENSMUSG00000038608	253	354	214	157	106	81	2.00	2.73	1.53	1.22	0.85	0.62	2.08666666666667	0.896666666666667	-1.218556484376	0.000455882416964157	0.0102608422735127	Dock10	-	-	-
ENSMUSG00000075033	208	427	308	175	68	79	1.59	3.18	2.32	1.33	0.55	0.64	2.36333333333333	0.84	-1.4923618937396	0.00046303691882047	0.0103572520349387	Nxpe3	-	-	-
ENSMUSG00000036202	386	820	512	327	178	180	2.87	5.99	3.91	2.62	1.91	1.80	4.25666666666667	2.11	-1.01248112027438	0.00047172492863299	0.0104513633848263	Rif1	Cellular Processes	Cellular community - eukaryotes	K11138
ENSMUSG00000037716	43	67	227	34	8	11	0.79	1.11	3.85	0.76	0.15	0.20	1.91666666666667	0.37	-2.37300227948163	0.000472090369333975	0.0104513633848263	Ccdc33	-	-	-
ENSMUSG00000041189	440	671	732	362	165	258	10.03	14.90	16.49	8.21	3.98	6.23	13.8066666666667	6.14	-1.16905449212918	0.00047352496028837	0.0104574919408428	Chrnb1	Environmental Information Processing	Signaling molecules and interaction	K04812
ENSMUSG00000025921	2221	3190	6779	1971	1120	1344	30.42	42.56	91.76	26.86	16.24	19.51	54.9133333333333	20.87	-1.39572588750105	0.00047770969809635	0.0105112548822921	Rdh10	Metabolism;Metabolism	Global and overview maps;Metabolism of cofactors and vitamins	K11151;K11151
ENSMUSG00000027171	62	151	104	44	17	29	1.35	2.78	1.76	0.75	0.52	0.80	1.96333333333333	0.69	-1.50863686633113	0.00047925222822033	0.0105112548822921	Prrg4	-	-	-
ENSMUSG00000001508	4	4	8	17	27	30	0.14	0.13	0.36	1.21	0.96	1.07	0.21	1.08	2.36257007938471	0.000480323344444146	0.0105112548822921	Sgca	Human Diseases;Human Diseases;Human Diseases;Human Diseases	Cardiovascular diseases;Cardiovascular diseases;Cardiovascular diseases;Cardiovascular diseases	K12565;K12565;K12565;K12565
ENSMUSG00000037568	301	327	258	176	75	121	3.79	4.02	3.20	2.21	1.00	1.62	3.67	1.61	-1.1887193747286	0.000480614255896668	0.0105112548822921	Vash2	-	-	-
ENSMUSG00000029832	714	904	587	429	107	184	14.32	17.87	11.93	9.06	2.49	4.14	14.7066666666667	5.23	-1.49158743862329	0.000491968099402041	0.0106776657070659	Nfe2l3	-	-	-
ENSMUSG00000022651	52	86	356	10	0	7	4.31	6.94	29.15	0.82	0.00	0.61	13.4666666666667	0.476666666666667	-4.82026824086077	0.000497149983322186	0.0107557059266051	Retnlg	-	-	-
ENSMUSG00000026276	784	967	793	578	494	427	20.50	19.10	17.89	8.63	8.03	8.88	19.1633333333333	8.51333333333333	-1.17055250571078	0.000508851777829827	0.0109433421029712	Septin2	Human Diseases;Human Diseases	Infectious diseases;Infectious diseases	K16942;K16942
ENSMUSG00000006313	119	66	67	158	163	164	4.11	2.22	2.29	5.43	5.96	6.01	2.87333333333333	5.8	1.01332753164699	0.000516743374598213	0.0110735101567221	Upk1a	-	-	-
ENSMUSG00000061959	182	101	45	285	292	264	4.48	2.41	1.07	6.96	7.63	6.82	2.65333333333333	7.13666666666667	1.42744445984186	0.000520148331389404	0.0111200942089344	Ces1e	Metabolism	Xenobiotics biodegradation and metabolism	K01044
ENSMUSG00000035896	255	347	309	162	79	153	12.63	16.74	15.12	7.98	4.14	8.03	14.83	6.71666666666667	-1.14270125976046	0.000530384632503624	0.0112937438585916	Rnase1	-	-	-
ENSMUSG00000078566	755	1454	1423	697	411	528	23.76	43.41	44.79	21.05	12.55	15.65	37.32	16.4166666666667	-1.18478776234181	0.000530803997585295	0.0112937438585916	Bnip3	Human Diseases;Cellular Processes;Environmental Information Processing;Cellular Processes;Human Diseases	Infectious diseases;Transport and catabolism;Signal transduction;Transport and catabolism;Infectious diseases	K15464;K15464;K15464;K15464;K15464
ENSMUSG00000095127	494	238	173	70	82	128	62.87	29.51	21.76	8.86	11.05	17.26	38.0466666666667	12.39	-1.61859387481469	0.000531396749504727	0.0112937438585916	Ighv1-82	Environmental Information Processing;Human Diseases;Environmental Information Processing;Human Diseases;Human Diseases;Cellular Processes;Human Diseases;Human Diseases;Human Diseases;Environmental Information Processing;Environmental Information Processing;Human Diseases;Human Diseases;Human Diseases;Human Diseases;Organismal Systems;Human Diseases;Organismal Systems;Human Diseases;Organismal Sys…	Signal transduction;Infectious diseases;Signal transduction;Cancers;Infectious diseases;Transport and catabolism;Infectious diseases;Immune diseases;Infectious diseases;Signal transduction;Signal transduction;Immune diseases;Cardiovascular diseases;Immune diseases;Infectious diseases;Immune system;Immune diseases;Immune system;Cardiovascular diseases;Immune system;Immune system;Immune system;Infe…	K06856;K06856;K06856;K06856;K06856;K06856;K06856;K06856;K06856;K06856;K06856;K06856;K06856;K06856;K06856;K06856;K06856;K06856;K06856;K06856;K06856;K06856;K06856;K06856;K06856;K06856;K06856
ENSMUSG00000044468	1270	2225	2576	1240	678	712	11.06	18.88	22.18	10.75	6.25	6.57	17.3733333333333	7.85666666666667	-1.14488532531796	0.000533174832088635	0.0113075821281268	Tent5c	-	-	-
ENSMUSG00000046805	2278	3066	2724	1796	1037	701	25.82	33.86	30.52	20.25	12.44	8.42	30.0666666666667	13.7033333333333	-1.13363806157881	0.000534664378005124	0.0113075821281268	Mpeg1	-	-	-
ENSMUSG00000050092	42	13	12	2	0	2	2.63	0.79	0.74	0.12	0.00	0.13	1.38666666666667	0.0833333333333333	-4.05658352836637	0.00053517756543307	0.0113075821281268	Sprr2b	-	-	-
ENSMUSG00000033964	422	744	573	356	230	244	3.90	5.55	5.09	2.70	1.60	1.63	4.84666666666667	1.97666666666667	-1.29392325937359	0.000543560045771749	0.0114578905797744	Zbtb41	-	-	-
ENSMUSG00000098306	34	24	12	56	55	97	1.25	0.77	0.39	1.87	1.96	3.44	0.803333333333333	2.42333333333333	1.59292221768963	0.000548690802346929	0.0115256969120899	Gm28040	-	-	-
ENSMUSG00000038774	797	1475	1388	752	431	482	5.13	9.31	8.73	4.82	2.89	3.23	7.72333333333333	3.64666666666667	-1.08264530607226	0.000550477975127187	0.0115498079218033	Ascc3	-	-	-
ENSMUSG00000031595	482	1070	627	387	188	286	15.30	33.08	19.67	12.22	6.32	9.62	22.6833333333333	9.38666666666666	-1.27294782775406	0.00055649074583535	0.0116168573988263	Pdgfrl	-	-	-
ENSMUSG00000060510	939	1763	1550	866	615	556	9.17	16.62	16.48	7.61	6.00	5.26	14.09	6.29	-1.16353968943035	0.000560064653291469	0.0116353897178128	Zfp266	Human Diseases	Infectious diseases	K09228
ENSMUSG00000033411	363	525	419	261	215	243	4.70	7.18	6.15	2.95	3.03	3.01	6.01	2.99666666666667	-1.00400637591789	0.000566694990876255	0.0117132093937981	Ctdspl2	-	-	-
ENSMUSG00000031351	230	75	147	63	36	28	3.18	1.01	2.01	0.87	0.53	0.41	2.06666666666667	0.603333333333333	-1.77627851819104	0.00057168844083498	0.0117543235560489	Zfp185	-	-	-
ENSMUSG00000074657	55	90	78	89	254	187	0.43	0.68	0.60	0.72	2.15	1.55	0.57	1.47333333333333	1.37005004450553	0.000572588138905233	0.0117543235560489	Kif5a	Human Diseases;Cellular Processes;Human Diseases;Organismal Systems	Neurodegenerative diseases;Transport and catabolism;Neurodegenerative diseases;Nervous system	K10396;K10396;K10396;K10396
ENSMUSG00000025213	24	21	18	42	66	47	0.85	0.73	0.63	1.46	2.49	1.75	0.736666666666667	1.9	1.36691554966067	0.000576879937665849	0.0118289853279609	Kazald1	-	-	-
ENSMUSG00000090223	35	37	9	43	127	136	2.68	2.76	0.67	3.26	10.30	11.04	2.03666666666667	8.2	2.00941403040787	0.000584627082735617	0.0119336590391174	Pcp4	-	-	-
ENSMUSG00000022372	246	300	346	191	101	103	4.78	5.49	6.07	3.47	2.02	1.95	5.44666666666667	2.48	-1.13503345703765	0.000589533838412575	0.0120066840934872	Sla	-	-	-
ENSMUSG00000029193	30	51	28	54	149	93	0.50	0.83	0.46	0.90	2.64	1.65	0.596666666666667	1.73	1.53577495109362	0.00059353649574361	0.0120551740278825	Cckar	Environmental Information Processing;Environmental Information Processing;Organismal Systems;Organismal Systems	Signaling molecules and interaction;Signal transduction;Digestive system;Endocrine system	K04194;K04194;K04194;K04194
ENSMUSG00000029865	2269	1786	1971	1113	848	326	181.24	138.98	155.61	88.45	71.70	27.59	158.61	62.58	-1.34171016886118	0.000594536357133319	0.0120551740278825	Sval1	-	-	-
ENSMUSG00000024109	112	535	261	107	30	76	0.69	3.80	1.91	1.46	0.36	0.47	2.13333333333333	0.763333333333333	-1.48272430679042	0.000600138085254315	0.012113401687284	Nrxn1	Environmental Information Processing	Signaling molecules and interaction	K07377
ENSMUSG00000056054	244	335	747	89	9	18	24.66	32.99	74.63	8.95	0.96	1.93	44.0933333333333	3.94666666666667	-3.48185396456216	0.000602293267697407	0.0121297969687332	S100a8	Organismal Systems	Immune system	K21127
ENSMUSG00000034936	60	73	30	83	165	152	2.13	2.53	1.05	2.94	6.21	5.73	1.90333333333333	4.96	1.38181187574519	0.000630045732864198	0.0125764122549766	Arl4d	-	-	-
ENSMUSG00000041268	132	317	260	102	97	51	0.62	1.50	1.29	0.51	0.55	0.27	1.13666666666667	0.443333333333333	-1.35834549352299	0.000631431271257336	0.0125764122549766	Dmxl2	-	-	-
ENSMUSG00000017491	105	307	265	102	55	65	1.85	5.51	4.50	2.03	1.13	1.36	3.95333333333333	1.50666666666667	-1.39170933213081	0.00063312164238753	0.0125961921472805	Rarb	Human Diseases;Human Diseases;Human Diseases;Human Diseases	Cancers;Cancers;Cancers;Cancers	K08528;K08528;K08528;K08528
ENSMUSG00000027238	83	73	79	31	20	36	1.57	1.24	1.44	0.58	0.33	0.76	1.41666666666667	0.556666666666667	-1.34761473855101	0.000638041786526369	0.0126488566205722	Frmd5	-	-	-
ENSMUSG00000098132	184	248	339	130	79	121	2.59	3.39	4.71	1.82	1.18	1.80	3.56333333333333	1.6	-1.15515554211197	0.000648106589329439	0.0127776741705018	Rassf10	-	-	-
ENSMUSG00000061517	896	1106	1361	746	322	402	11.59	13.93	17.39	9.60	4.41	5.51	14.3033333333333	6.50666666666667	-1.1363608481855	0.000648801343866545	0.0127776741705018	Sox21	-	-	-
ENSMUSG00000036027	10	8	5	20	38	30	0.37	0.29	0.18	0.73	1.48	1.17	0.28	1.12666666666667	2.00856201350343	0.00065114812760247	0.0127997724974305	1810046K07Rik	-	-	-
ENSMUSG00000040187	119	160	198	89	58	52	2.22	2.89	3.50	1.55	1.09	0.99	2.87	1.21	-1.24604368940109	0.00065876976303007	0.0129214720620393	Arntl2	-	-	-
ENSMUSG00000051596	177	749	1261	156	61	65	2.77	11.41	19.49	2.45	1.02	1.08	11.2233333333333	1.51666666666667	-2.88752527074158	0.000665108175268119	0.0129885697508366	Otop1	-	-	-
ENSMUSG00000006411	454	453	417	277	85	133	6.93	6.67	6.28	4.20	1.37	2.14	6.62666666666667	2.57	-1.36651499164725	0.000679005696964677	0.0131086958873515	Nectin4	Cellular Processes	Cellular community - eukaryotes	K06593
ENSMUSG00000074677	66	110	90	45	22	20	2.20	3.53	3.18	1.49	0.70	0.71	2.97	0.966666666666667	-1.61937253150699	0.000686060642754647	0.0131738036887866	Sirpb1c	Organismal Systems	Development	K06551
ENSMUSG00000009097	108	116	97	60	40	37	2.93	2.77	2.49	1.51	1.39	1.07	2.73	1.32333333333333	-1.04472444449805	0.000710911264887735	0.0134196572624837	Tbx1	-	-	-
ENSMUSG00000021945	840	1358	972	692	481	433	7.10	11.03	7.83	5.28	3.84	3.23	8.65333333333333	4.11666666666667	-1.0717793415271	0.000714742394157584	0.0134638387387453	Zmym2	-	-	-
ENSMUSG00000037411	388	222	493	148	182	101	6.54	3.70	8.20	2.41	3.21	1.75	6.14666666666667	2.45666666666667	-1.32310213133427	0.000717839040222099	0.0134948768754257	Serpine1	Cellular Processes;Environmental Information Processing;Human Diseases;Environmental Information Processing;Environmental Information Processing;Human Diseases;Organismal Systems;Cellular Processes	Cell growth and death;Signal transduction;Infectious diseases;Signal transduction;Signal transduction;Endocrine and metabolic diseases;Immune system;Cell growth and death	K03982;K03982;K03982;K03982;K03982;K03982;K03982;K03982
ENSMUSG00000031661	6310	13366	14674	6146	3318	5083	143.30	298.51	336.18	142.44	84.44	124.96	259.33	117.28	-1.14483210214871	0.000719073853860072	0.0135031904053869	Nkd1	Environmental Information Processing;Environmental Information Processing	Signal transduction;Signal transduction	K03213;K03213
ENSMUSG00000047036	1029	1966	1611	947	541	674	13.20	22.24	22.23	9.70	5.48	9.22	19.2233333333333	8.13333333333333	-1.24093987460687	0.000723088525644593	0.0135322962384686	Zfp445	-	-	-
ENSMUSG00000052270	21	29	65	7	9	4	1.04	1.39	3.24	0.35	0.41	0.24	1.89	0.333333333333333	-2.50334873516751	0.000723771750128982	0.0135322962384686	Fpr2	Environmental Information Processing;Human Diseases	Signaling molecules and interaction;Infectious diseases	K04173;K04173
ENSMUSG00000032796	413	299	666	260	121	98	2.13	1.50	3.39	1.33	0.66	0.54	2.34	0.843333333333333	-1.47233364561025	0.000724258243160899	0.0135322962384686	Lama1	Human Diseases;Environmental Information Processing;Human Diseases;Human Diseases;Human Diseases;Human Diseases;Cellular Processes;Human Diseases;Human Diseases;Human Diseases;Environmental Information Processing;Human Diseases	Cancers;Signal transduction;Infectious diseases;Cardiovascular diseases;Infectious diseases;Cardiovascular diseases;Cellular community - eukaryotes;Infectious diseases;Cancers;Cardiovascular diseases;Signaling molecules and interaction;Cardiovascular diseases	K05637;K05637;K05637;K05637;K05637;K05637;K05637;K05637;K05637;K05637;K05637;K05637
ENSMUSG00000041324	291	209	204	138	49	48	2.24	1.89	1.55	1.06	0.40	0.39	1.89333333333333	0.616666666666667	-1.61836565898837	0.000724369994754098	0.0135322962384686	Inhba	Environmental Information Processing;Cellular Processes;Environmental Information Processing	Signaling molecules and interaction;Cellular community - eukaryotes;Signal transduction	K04667;K04667;K04667
ENSMUSG00000045071	298	406	368	204	119	197	2.21	2.92	2.59	1.27	0.89	1.48	2.57333333333333	1.21333333333333	-1.08466239706939	0.000731274934000458	0.0136050274796275	E130308A19Rik	-	-	-
ENSMUSG00000058099	217	209	238	139	99	71	2.68	2.82	3.20	1.92	1.47	0.91	2.9	1.43333333333333	-1.01667874114663	0.000750719265846827	0.0138385138137989	Nfam1	-	-	-
ENSMUSG00000018451	26	29	22	35	108	75	0.85	0.93	0.71	1.15	3.76	2.61	0.83	2.50666666666667	1.59458691960956	0.000756805001778609	0.0138895416291631	6330403K07Rik	-	-	-
ENSMUSG00000048217	49	54	13	130	105	91	1.19	1.27	0.31	3.13	2.69	2.34	0.923333333333333	2.72	1.55868317592231	0.000757331774410501	0.0138895416291631	Nags	Metabolism;Metabolism;Metabolism;Metabolism	Global and overview maps;Global and overview maps;Amino acid metabolism;Global and overview maps	K11067;K11067;K11067;K11067
ENSMUSG00000025017	745	1492	1169	714	345	373	8.17	15.93	12.66	7.79	4.00	4.33	12.2533333333333	5.37333333333333	-1.18928502276106	0.000764183089325772	0.0139726391788159	Pik3ap1	Environmental Information Processing;Organismal Systems	Signal transduction;Immune system	K12230;K12230
ENSMUSG00000032523	15	19	14	21	71	73	0.40	0.49	0.39	0.57	1.97	2.06	0.426666666666667	1.53333333333333	1.84549005094437	0.000771298670049284	0.0140742530044852	Hhatl	-	-	-
ENSMUSG00000076555	176	105	102	26	54	48	23.18	13.47	13.28	3.41	7.53	6.70	16.6433333333333	5.88	-1.50105634577257	0.000790226841396606	0.0143436416609282	Igkv4-57-1	-	-	-
ENSMUSG00000038583	51	109	34	89	250	216	1.14	2.58	0.71	2.31	7.22	6.42	1.47666666666667	5.31666666666667	1.84817782009721	0.000796018047322977	0.0144088837924745	Pln	Environmental Information Processing;Environmental Information Processing;Human Diseases;Environmental Information Processing;Organismal Systems;Organismal Systems	Signal transduction;Signal transduction;Cardiovascular diseases;Signal transduction;Circulatory system;Endocrine system	K05852;K05852;K05852;K05852;K05852;K05852
ENSMUSG00000038047	177	377	334	149	110	125	1.41	2.93	2.63	1.18	0.93	1.06	2.32333333333333	1.05666666666667	-1.13667581572901	0.000809675455594395	0.0145540170202117	Haus6	-	-	-
ENSMUSG00000095753	388	126	86	32	24	72	51.93	16.81	11.38	4.26	3.40	10.21	26.7066666666667	5.95666666666667	-2.16462278677122	0.000811816788914463	0.0145616224506296	Igkv4-53	-	-	-
ENSMUSG00000010311	58	56	51	71	122	153	1.76	1.61	1.53	2.15	3.93	4.85	1.63333333333333	3.64333333333333	1.15743974666934	0.000813322837126226	0.0145616224506296	Optc	-	-	-
ENSMUSG00000030142	48	59	68	23	3	11	0.94	1.43	1.31	0.45	0.06	0.23	1.22666666666667	0.246666666666667	-2.31410859042807	0.00081753548849533	0.0146203303882605	Clec4e	Human Diseases;Organismal Systems	Infectious diseases;Immune system	K10059;K10059
ENSMUSG00000068748	851	1311	488	481	193	274	7.84	11.96	4.50	4.46	1.82	2.67	8.1	2.98333333333333	-1.44099672634153	0.00081822053819714	0.0146203303882605	Ptprz1	Human Diseases	Infectious diseases	K08114
ENSMUSG00000032327	3350	6979	11312	2319	642	1179	59.45	120.07	204.04	40.96	12.06	22.22	127.853333333333	25.08	-2.3498805210992	0.000837911020486191	0.0148546247154888	Stra6	-	-	-
ENSMUSG00000068130	33	81	44	17	13	11	0.57	1.32	0.74	0.29	0.27	0.20	0.876666666666667	0.253333333333333	-1.79099147584872	0.000843166161564299	0.0148893418461965	Zfp442	Human Diseases	Infectious diseases	K09228
ENSMUSG00000020189	348	612	427	282	178	202	2.73	4.57	3.49	2.00	1.34	1.61	3.59666666666667	1.65	-1.12419443452105	0.000850989546928357	0.0149330010109875	Osbpl8	-	-	-
ENSMUSG00000027296	77	47	21	114	147	114	2.08	1.24	0.56	3.06	4.20	3.26	1.29333333333333	3.50666666666667	1.43900614710518	0.000859185885033816	0.0150108249643481	Itpka	Metabolism;Environmental Information Processing;Environmental Information Processing;Metabolism	Global and overview maps;Signal transduction;Signal transduction;Carbohydrate metabolism	K00911;K00911;K00911;K00911
ENSMUSG00000031480	83	307	241	71	72	57	1.03	3.98	3.37	1.02	1.02	0.89	2.79333333333333	0.976666666666667	-1.5160495792771	0.000866893404480383	0.0151162445482028	Thsd1	-	-	-
ENSMUSG00000045763	681	1256	2121	744	248	295	18.03	32.40	55.52	19.60	6.95	8.28	35.3166666666667	11.61	-1.60498120967281	0.000870034368739902	0.0151563846396204	Basp1	-	-	-
ENSMUSG00000042759	125	250	432	119	29	63	1.66	3.25	6.49	2.00	0.41	0.98	3.8	1.13	-1.74967664591576	0.000873172230199184	0.0151963933897382	Apobr	-	-	-
ENSMUSG00000003849	1744	824	400	2209	2381	2492	55.16	25.39	12.51	69.52	79.72	83.53	31.02	77.59	1.32267203974896	0.000890771541462546	0.0153988400923645	Nqo1	Metabolism;Human Diseases;Human Diseases;Human Diseases;Metabolism	Global and overview maps;Cancers;Cancers;Cardiovascular diseases;Metabolism of cofactors and vitamins	K00355;K00355;K00355;K00355;K00355
ENSMUSG00000033006	39	25	24	38	138	89	0.71	0.44	0.43	0.68	2.64	1.71	0.526666666666667	1.67666666666667	1.67063384162843	0.000898663948264661	0.0154820356437301	Sox10	-	-	-
ENSMUSG00000038151	329	319	304	204	89	136	3.38	3.02	2.98	1.99	0.92	1.39	3.12666666666667	1.43333333333333	-1.12525126292592	0.000901664790643665	0.0155129280409312	Prdm1	-	-	-
ENSMUSG00000004814	37	71	26	11	5	12	2.75	4.87	1.91	0.92	0.20	0.66	3.17666666666667	0.593333333333333	-2.42059897294355	0.000907592419613281	0.0155754259475114	Ccl24	Environmental Information Processing;Organismal Systems;Environmental Information Processing	Signaling molecules and interaction;Immune system;Signaling molecules and interaction	K21097;K21097;K21097
ENSMUSG00000025473	566	726	450	377	152	183	8.95	11.21	7.04	5.94	2.54	3.07	9.06666666666667	3.85	-1.23571379983428	0.000936391342481881	0.0158984112800143	Adam8	-	-	-
ENSMUSG00000028282	213	392	222	142	107	122	1.59	2.86	1.64	1.06	0.85	0.96	2.03	0.956666666666667	-1.08539149123064	0.000938557235232008	0.015920222022973	Casp8ap2	-	-	-
ENSMUSG00000009628	139	615	238	125	31	83	1.16	4.80	2.02	1.24	0.39	0.83	2.66	0.82	-1.69773043088311	0.000950683998668012	0.0160655813245441	Tex15	-	-	-
ENSMUSG00000040430	404	468	398	295	197	216	4.38	3.59	5.10	2.31	1.67	1.84	4.35666666666667	1.94	-1.16716808288715	0.000963395079579234	0.0162348247319019	Pitpnc1	-	-	-
ENSMUSG00000062593	117	248	195	100	41	28	3.75	7.57	6.31	3.27	1.41	0.82	5.87666666666667	1.83333333333333	-1.68052895090816	0.000975269642765569	0.016322905657759	Gm49339	Organismal Systems;Organismal Systems	Immune system;Development	K06512;K06512
ENSMUSG00000002688	164	166	403	103	75	87	2.21	2.17	5.36	1.38	1.07	1.24	3.24666666666667	1.23	-1.40030095602195	0.000976507072363636	0.016322905657759	Prkd1	Environmental Information Processing;Organismal Systems	Signal transduction;Endocrine system	K06070;K06070
ENSMUSG00000016382	1120	3272	4560	1377	915	857	17.44	49.72	70.37	21.36	15.13	14.16	45.8433333333333	16.8833333333333	-1.44111217999182	0.000987040695276089	0.0164340001476153	Pls3	-	-	-
ENSMUSG00000094491	226	46	50	31	15	16	29.68	5.89	6.49	4.05	2.09	2.23	14.02	2.79	-2.32914932218144	0.000998734961007245	0.0165524285051338	Igkv1-133	-	-	-
ENSMUSG00000045205	366	570	469	309	167	198	2.93	4.06	3.37	2.24	1.29	1.53	3.45333333333333	1.68666666666667	-1.03381471299224	0.00102040504316685	0.0168383291494494	Dpy19l4	-	-	-
ENSMUSG00000059108	29	53	215	23	16	14	2.15	3.83	15.67	1.70	1.25	1.10	7.21666666666667	1.35	-2.4183732118421	0.0010405585288211	0.0170663162573073	Ifitm6	-	-	-
ENSMUSG00000072294	207	410	433	177	161	108	2.27	3.62	4.04	1.47	1.42	0.95	3.31	1.28	-1.37068740680722	0.00104472211871558	0.0171046015028856	Klf12	-	-	-
ENSMUSG00000095571	262	483	229	157	20	57	31.78	57.07	27.45	18.95	2.57	7.33	38.7666666666667	9.61666666666667	-2.01120787282774	0.00104530750396821	0.0171046015028856	Ighv5-17	Environmental Information Processing;Human Diseases;Environmental Information Processing;Human Diseases;Human Diseases;Cellular Processes;Human Diseases;Human Diseases;Human Diseases;Environmental Information Processing;Environmental Information Processing;Human Diseases;Human Diseases;Human Diseases;Human Diseases;Organismal Systems;Human Diseases;Organismal Systems;Human Diseases;Organismal Sys…	Signal transduction;Infectious diseases;Signal transduction;Cancers;Infectious diseases;Transport and catabolism;Infectious diseases;Immune diseases;Infectious diseases;Signal transduction;Signal transduction;Immune diseases;Cardiovascular diseases;Immune diseases;Infectious diseases;Immune system;Immune diseases;Immune system;Cardiovascular diseases;Immune system;Immune system;Immune system;Infe…	K06856;K06856;K06856;K06856;K06856;K06856;K06856;K06856;K06856;K06856;K06856;K06856;K06856;K06856;K06856;K06856;K06856;K06856;K06856;K06856;K06856;K06856;K06856;K06856;K06856;K06856;K06856
ENSMUSG00000118661	340	440	1137	222	171	262	1.07	1.35	3.54	0.70	0.57	0.87	1.98666666666667	0.713333333333333	-1.47770153406102	0.00104853916978579	0.0171419548436021	-	-	-	-
ENSMUSG00000038242	146	271	220	83	30	98	1.44	2.61	2.15	0.82	0.31	1.03	2.06666666666667	0.72	-1.52123690311077	0.00107635971705195	0.0173921630487867	Aox4	Metabolism;Environmental Information Processing;Metabolism;Metabolism;Metabolism;Metabolism;Metabolism;Metabolism;Metabolism	Global and overview maps;Signal transduction;Metabolism of cofactors and vitamins;Xenobiotics biodegradation and metabolism;Amino acid metabolism;Amino acid metabolism;Metabolism of cofactors and vitamins;Amino acid metabolism;Metabolism of cofactors and vitamins	K00157;K00157;K00157;K00157;K00157;K00157;K00157;K00157;K00157
ENSMUSG00000001804	7	48	240	10	8	13	0.10	0.66	3.35	0.14	0.12	0.19	1.37	0.15	-3.19114148735201	0.00108813843386828	0.0174940981574041	Dsg4	-	-	-
ENSMUSG00000038526	5	7	1	14	41	21	0.15	0.20	0.03	0.39	1.23	0.63	0.126666666666667	0.75	2.56585367777345	0.00108833674694915	0.0174940981574041	Car14	Metabolism;Metabolism	Global and overview maps;Energy metabolism	K01672;K01672
ENSMUSG00000038086	8	23	9	26	67	48	0.69	1.93	0.75	2.15	5.83	4.32	1.12333333333333	4.1	1.86783781904475	0.00109849132941522	0.0175898166303012	Hspb2	Human Diseases	Cancers	K09543
ENSMUSG00000046311	292	603	355	240	117	155	4.76	7.73	4.99	3.12	1.57	2.09	5.82666666666667	2.26	-1.36634800636426	0.00109964235960924	0.0175898166303012	Zfp62	-	-	-
ENSMUSG00000062410	2498	1640	694	4174	3254	2887	90.32	57.85	25.29	149.11	122.68	108.27	57.82	126.686666666667	1.13162417987945	0.00111175823838738	0.0177224974863696	Hsd3b3	Metabolism;Human Diseases;Metabolism;Organismal Systems;Organismal Systems;Organismal Systems	Global and overview maps;Endocrine and metabolic diseases;Lipid metabolism;Endocrine system;Endocrine system;Endocrine system	K00070;K00070;K00070;K00070;K00070;K00070
ENSMUSG00000096108	187	5	17	10	2	2	19.93	0.52	1.79	1.06	0.23	0.23	7.41333333333333	0.506666666666667	-3.87101355927992	0.00111802189442916	0.0177224974863696	Ighv11-2	Environmental Information Processing;Human Diseases;Environmental Information Processing;Human Diseases;Human Diseases;Cellular Processes;Human Diseases;Human Diseases;Human Diseases;Environmental Information Processing;Environmental Information Processing;Human Diseases;Human Diseases;Human Diseases;Human Diseases;Organismal Systems;Human Diseases;Organismal Systems;Human Diseases;Organismal Sys…	Signal transduction;Infectious diseases;Signal transduction;Cancers;Infectious diseases;Transport and catabolism;Infectious diseases;Immune diseases;Infectious diseases;Signal transduction;Signal transduction;Immune diseases;Cardiovascular diseases;Immune diseases;Infectious diseases;Immune system;Immune diseases;Immune system;Cardiovascular diseases;Immune system;Immune system;Immune system;Infe…	K06856;K06856;K06856;K06856;K06856;K06856;K06856;K06856;K06856;K06856;K06856;K06856;K06856;K06856;K06856;K06856;K06856;K06856;K06856;K06856;K06856;K06856;K06856;K06856;K06856;K06856;K06856
ENSMUSG00000020431	651	1126	2540	632	329	499	2.61	4.40	10.06	2.52	1.40	2.12	5.69	2.01333333333333	-1.49884260370266	0.00112499679483691	0.0177494035796757	Adcy1	Metabolism;Human Diseases;Environmental Information Processing;Human Diseases;Environmental Information Processing;Environmental Information Processing;Human Diseases;Human Diseases;Organismal Systems;Environmental Information Processing;Human Diseases;Organismal Systems;Environmental Information Processing;Human Diseases;Organismal Systems;Human Diseases;Organismal Systems;Organismal Systems;Org…	Global and overview maps;Cancers;Signal transduction;Infectious diseases;Signal transduction;Signal transduction;Infectious diseases;Infectious diseases;Environmental adaptation;Signal transduction;Cardiovascular diseases;Immune system;Signal transduction;Endocrine and metabolic diseases;Endocrine system;Infectious diseases;Nervous system;Circulatory system;Endocrine system;Nucleotide metabolism;…	K08041;K08041;K08041;K08041;K08041;K08041;K08041;K08041;K08041;K08041;K08041;K08041;K08041;K08041;K08041;K08041;K08041;K08041;K08041;K08041;K08041;K08041;K08041;K08041;K08041;K08041;K08041;K08041;K08041;K08041;K08041;K08041;K08041;K08041;K08041;K08041;K08041;K08041;K08041;K08041;K08041;K08041;K08041;K08041;K08041;K08041;K08041;K08041;K08041;K08041;K08041
ENSMUSG00000029219	8	11	10	10	58	66	0.19	0.25	0.25	0.34	1.43	1.91	0.23	1.22666666666667	2.41503749927885	0.00112855384881871	0.0177571024547691	Slc10a4	-	-	-
ENSMUSG00000047945	5614	8798	10916	4988	2444	4140	171.82	262.34	330.23	151.90	79.18	134.28	254.796666666667	121.786666666667	-1.06499020980151	0.00113039954735591	0.0177571024547691	Marcksl1	Organismal Systems;Human Diseases	Immune system;Infectious diseases	K13536;K13536
ENSMUSG00000033799	408	652	438	306	114	193	2.50	4.32	3.33	2.05	0.82	1.37	3.38333333333333	1.41333333333333	-1.25934355750934	0.0011390461610229	0.0178332944994893	Tasor2	-	-	-
ENSMUSG00000025592	59	31	10	3	7	2	0.89	0.47	0.18	0.06	0.13	0.04	0.513333333333333	0.0766666666666667	-2.74322458463789	0.00113919855258293	0.0178332944994893	Dach2	-	-	-
ENSMUSG00000053706	47	33	84	5	15	0	0.63	0.42	1.10	0.07	0.21	0.00	0.716666666666667	0.0933333333333333	-2.94083792753186	0.00114757038306969	0.0179022961745717	B430305J03Rik	-	-	-
ENSMUSG00000056019	109	196	133	76	41	60	1.51	1.65	1.57	0.78	0.30	0.65	1.57666666666667	0.576666666666667	-1.45106814570267	0.00115774710062567	0.0180294360970239	Zfp709	Human Diseases	Infectious diseases	K09228
ENSMUSG00000012520	20	25	34	33	116	80	0.33	0.40	0.55	0.54	2.00	1.38	0.426666666666667	1.30666666666667	1.61470984411521	0.00117465170080481	0.0181886434982925	Phox2b	-	-	-
ENSMUSG00000040612	39	40	362	28	17	22	0.28	0.25	2.20	0.21	0.11	0.14	0.91	0.153333333333333	-2.56919518486284	0.00117903924509717	0.0182169458429409	Ildr2	-	-	-
ENSMUSG00000049265	66	72	46	85	130	136	0.85	0.90	0.59	1.09	1.77	1.86	0.78	1.57333333333333	1.01227832977843	0.0011855471991513	0.0182582354242696	Kcnk3	Human Diseases;Organismal Systems;Organismal Systems	Endocrine and metabolic diseases;Endocrine system;Endocrine system	K04914;K04914;K04914
ENSMUSG00000063727	1821	2921	3289	1057	245	400	31.74	49.61	56.67	18.33	4.52	7.39	46.0066666666667	10.08	-2.19034729341992	0.00119583961586778	0.0183396928424514	Tnfrsf11b	Environmental Information Processing;Organismal Systems	Signaling molecules and interaction;Development	K05148;K05148
ENSMUSG00000000686	36	50	53	14	18	11	0.66	0.90	0.97	0.26	0.35	0.22	0.843333333333333	0.276666666666667	-1.60795414334738	0.00120836596725059	0.018452350970737	Abhd15	-	-	-
ENSMUSG00000032849	1862	2764	4778	1756	979	1255	16.12	23.25	41.08	15.11	8.91	11.48	26.8166666666667	11.8333333333333	-1.18027339633141	0.00121772029452404	0.0185481594608573	Abcc4	Environmental Information Processing;Organismal Systems;Environmental Information Processing;Human Diseases	Signal transduction;Digestive system;Membrane transport;Drug resistance	K05673;K05673;K05673;K05673
ENSMUSG00000030680	7	1	0	4	138	9	0.60	0.11	0.00	0.33	6.02	0.97	0.236666666666667	2.44	3.36595271877936	0.0012231880380491	0.0185688167288714	Pagr1a	-	-	-
ENSMUSG00000078763	36	50	68	21	6	12	0.95	1.28	1.77	0.55	0.17	0.34	1.33333333333333	0.353333333333333	-1.91593573521152	0.00122484244445142	0.0185783196969059	Slfn1	-	-	-
ENSMUSG00000026579	44	113	435	35	49	30	0.29	0.73	2.84	0.23	0.34	0.21	1.28666666666667	0.26	-2.30705481840584	0.00123080898867419	0.0185892041076546	F5	Organismal Systems	Immune system	K03902
ENSMUSG00000033149	790	1256	1020	702	341	409	8.71	12.06	9.81	6.80	3.40	4.62	10.1933333333333	4.94	-1.04504295905497	0.00123394544201788	0.0185892041076546	Phldb2	-	-	-
ENSMUSG00000028497	248	668	1046	237	218	227	2.81	6.89	10.90	2.49	2.45	2.52	6.86666666666667	2.48666666666667	-1.46539680181534	0.00123468701530593	0.0185892041076546	Hacd4	Metabolism;Metabolism;Metabolism;Metabolism	Global and overview maps;Global and overview maps;Lipid metabolism;Lipid metabolism	K10703;K10703;K10703;K10703
ENSMUSG00000030187	23	69	37	12	10	7	0.63	1.84	1.00	0.33	0.29	0.20	1.15666666666667	0.273333333333333	-2.08123984796018	0.00124636106480348	0.01871613685426	Klra2	-	-	-
ENSMUSG00000037416	636	1126	753	551	325	305	2.74	4.75	3.22	2.38	1.49	1.39	3.57	1.75333333333333	-1.02582377545796	0.00126522904637678	0.0188428381886204	Dmxl1	-	-	-
ENSMUSG00000028576	86	121	103	51	48	43	2.00	2.71	2.34	1.17	1.17	1.05	2.35	1.13	-1.05633798414981	0.00127736786353771	0.0189923049010771	Ift74	-	-	-
ENSMUSG00000036699	31	37	27	41	142	76	0.74	0.81	0.61	0.94	3.47	1.87	0.72	2.09333333333333	1.53973324672816	0.00129844175769493	0.0192085166277003	Zcchc12	-	-	-
ENSMUSG00000022415	357	372	433	239	234	231	7.12	7.99	15.08	5.03	4.79	5.09	10.0633333333333	4.97	-1.01779049923018	0.00129935274392747	0.0192085166277003	Syngr1	-	-	-
ENSMUSG00000032890	25	26	22	35	80	64	0.19	0.20	0.16	0.59	0.91	0.51	0.183333333333333	0.67	1.86969197765427	0.00130442121689764	0.0192519356889345	Rims3	-	-	-
ENSMUSG00000022217	50	47	36	75	112	72	2.87	2.63	2.04	4.29	6.81	4.38	2.51333333333333	5.16	1.03776904287575	0.00133050155820575	0.0195001244750116	Emc9	-	-	-
ENSMUSG00000034730	8	8	6	21	30	23	0.08	0.06	0.13	0.28	0.28	0.30	0.09	0.286666666666667	1.67137725253863	0.00134232998331717	0.019555799313407	Adgrb1	Cellular Processes	Cell growth and death	K04596
ENSMUSG00000014932	561	1131	776	511	293	341	7.15	13.64	9.76	6.28	3.57	4.18	10.1833333333333	4.67666666666667	-1.12265737108619	0.00135547050534878	0.0196060201651033	Yes1	Cellular Processes	Cellular community - eukaryotes	K05705
ENSMUSG00000025323	179	320	201	140	77	79	1.90	3.31	2.14	1.37	0.77	0.85	2.45	0.996666666666667	-1.29759876552562	0.0013732870846425	0.0197676742502523	Sp4	-	-	-
ENSMUSG00000006740	2842	5392	3869	2623	1299	1772	23.14	44.32	32.27	21.25	11.20	15.29	33.2433333333333	15.9133333333333	-1.06282898374912	0.00137495763186573	0.0197759630729732	Kif5b	Human Diseases;Cellular Processes;Human Diseases;Organismal Systems	Neurodegenerative diseases;Transport and catabolism;Neurodegenerative diseases;Nervous system	K10396;K10396;K10396;K10396
ENSMUSG00000028211	1726	3302	2434	1658	564	668	15.69	29.24	21.87	15.00	5.43	6.43	22.2666666666667	8.95333333333333	-1.31438879793398	0.00137967296300069	0.0198064626423325	Trp53inp1	-	-	-
ENSMUSG00000042029	271	498	367	234	103	144	3.63	6.01	4.42	2.65	1.14	2.30	4.68666666666667	2.03	-1.2070824611662	0.00138691529591464	0.0198531100005531	Ncapg2	-	-	-
ENSMUSG00000030660	1039	1940	1275	929	337	454	7.38	12.79	8.22	5.76	2.25	3.04	9.46333333333333	3.68333333333333	-1.3613364794456	0.00139729472526874	0.0199559950211884	Pik3c2a	Metabolism;Environmental Information Processing;Metabolism	Global and overview maps;Signal transduction;Carbohydrate metabolism	K00923;K00923;K00923
ENSMUSG00000030180	1043	1662	1388	945	520	619	5.75	9.28	6.78	5.20	2.57	3.01	7.27	3.59333333333333	-1.01663259188825	0.0014068321486902	0.0200429201625303	Kdm5a	-	-	-
ENSMUSG00000041073	109	105	88	134	191	156	1.32	1.03	0.98	2.76	3.81	2.46	1.11	3.01	1.4392038104096	0.00142108196469367	0.0201822686259364	Nacad	-	-	-
ENSMUSG00000002107	253	328	610	190	176	133	2.65	4.03	7.04	2.19	2.47	1.49	4.57333333333333	2.05	-1.15762216594621	0.00143782556147387	0.0203083023987689	Celf2	-	-	-
ENSMUSG00000045624	191	311	194	128	72	110	2.76	4.38	2.77	1.84	1.10	1.69	3.30333333333333	1.54333333333333	-1.09787286392625	0.00145170562396463	0.020456366690266	Esf1	-	-	-
ENSMUSG00000025324	837	1852	2747	996	460	559	7.59	16.36	24.61	8.98	4.41	5.37	16.1866666666667	6.25333333333333	-1.37210859374031	0.00147752383386178	0.0207522407214973	Atp10a	-	-	-
ENSMUSG00000062949	365	587	361	261	136	208	2.97	4.65	2.90	2.12	1.18	1.80	3.50666666666667	1.7	-1.04456555243345	0.00149530979179228	0.0208754029279192	Atp11c	-	-	-
ENSMUSG00000039304	567	1074	361	325	254	212	5.58	10.29	3.63	3.18	2.92	2.21	6.5	2.77	-1.23055374186663	0.00149724207188082	0.0208862378598664	Tnfsf10	Human Diseases;Environmental Information Processing;Organismal Systems;Human Diseases;Human Diseases;Cellular Processes;Cellular Processes;Environmental Information Processing;Environmental Information Processing	Infectious diseases;Signaling molecules and interaction;Immune system;Infectious diseases;Infectious diseases;Cell growth and death;Cell growth and death;Signal transduction;Signaling molecules and interaction	K04721;K04721;K04721;K04721;K04721;K04721;K04721;K04721;K04721
ENSMUSG00000110444	77	146	83	52	19	28	0.49	0.90	1.61	0.33	0.13	0.78	1	0.413333333333333	-1.27462238010901	0.00149945108989945	0.0209009135332049	Gm10033	Human Diseases	Infectious diseases	K09228
ENSMUSG00000047702	94	95	82	46	33	42	1.52	1.50	1.31	0.74	0.57	0.72	1.44333333333333	0.676666666666667	-1.09288729754154	0.00151319783279777	0.0209920310091908	Olfr1388	Organismal Systems	Sensory system	K04257
ENSMUSG00000019966	1204	3977	4663	1522	934	1154	13.98	42.13	47.07	16.60	10.30	12.56	34.3933333333333	13.1533333333333	-1.38670049042912	0.00151952012433039	0.0209920310091908	Kitl	Human Diseases;Environmental Information Processing;Environmental Information Processing;Environmental Information Processing;Environmental Information Processing;Environmental Information Processing;Organismal Systems;Organismal Systems	Cancers;Signal transduction;Signal transduction;Signal transduction;Signal transduction;Signal transduction;Immune system;Endocrine system	K05461;K05461;K05461;K05461;K05461;K05461;K05461;K05461
ENSMUSG00000040648	1207	1981	1580	1111	608	676	11.57	18.39	14.94	9.69	5.71	6.38	14.9666666666667	7.26	-1.04371149091161	0.00154620302598764	0.0212515641666869	Ppip5k2	Environmental Information Processing	Signal transduction	K13024
ENSMUSG00000063687	49	87	69	33	12	19	0.68	1.18	0.95	0.46	0.18	0.28	0.936666666666667	0.306666666666667	-1.61086436416391	0.00154695858727889	0.0212515641666869	Pcdhb5	-	-	-
ENSMUSG00000026779	145	255	207	119	69	86	1.27	2.18	1.80	1.04	0.64	0.80	1.75	0.826666666666667	-1.08197730216661	0.00156797237068926	0.0214535984413449	Mastl	-	-	-
ENSMUSG00000042988	2094	4014	5273	2027	1232	1807	55.74	103.28	136.65	54.45	33.49	49.44	98.5566666666667	45.7933333333333	-1.105815879003	0.00156946062399061	0.0214535984413449	Notum	Environmental Information Processing	Signal transduction	K19882
ENSMUSG00000030528	133	308	180	98	60	89	1.55	3.57	1.96	1.04	0.68	1.01	2.36	0.91	-1.37484840916314	0.00157722101225103	0.0214998476718465	Blm	Genetic Information Processing;Genetic Information Processing	Replication and repair;Replication and repair	K10901;K10901
ENSMUSG00000046844	62	61	63	68	186	147	0.83	0.80	0.83	0.91	2.64	2.09	0.82	1.88	1.19703684705955	0.00158354904461426	0.0215433195733469	Vat1l	-	-	-
ENSMUSG00000039661	11	18	9	16	65	59	0.28	0.51	0.23	0.40	1.85	1.78	0.34	1.34333333333333	1.98221068655647	0.001587778783858	0.0215663336318758	Dusp26	-	-	-
ENSMUSG00000031592	670	1199	732	562	284	350	5.18	9.05	6.04	4.58	2.25	2.99	6.75666666666667	3.27333333333333	-1.04555115915221	0.00160314993061445	0.0217072794748721	Pcm1	-	-	-
ENSMUSG00000028351	38	16	28	5	3	7	0.58	0.24	0.42	0.08	0.05	0.11	0.413333333333333	0.08	-2.36923380966572	0.00164113612255387	0.0219121389903442	Brinp1	-	-	-
ENSMUSG00000024747	250	141	97	282	324	340	5.94	3.27	2.28	6.67	8.15	8.57	3.83	7.79666666666667	1.02551306370632	0.00166144278794268	0.0221178805926194	Aldh1a7	Metabolism;Metabolism	Global and overview maps;Metabolism of cofactors and vitamins	K07249;K07249
ENSMUSG00000057835	70	83	62	33	26	30	1.70	1.97	1.49	0.80	0.67	0.77	1.72	0.746666666666667	-1.20387233336565	0.00167933128676672	0.0222892769797872	Zfp119a	Human Diseases	Infectious diseases	K09228
ENSMUSG00000026395	443	600	357	309	178	155	4.98	6.99	3.82	3.22	1.98	1.95	5.26333333333333	2.38333333333333	-1.14299602419449	0.00169786368608599	0.0224373866050792	Ptprc	Human Diseases;Organismal Systems;Environmental Information Processing;Human Diseases;Organismal Systems	Infectious diseases;Immune system;Signaling molecules and interaction;Immune diseases;Immune system	K06478;K06478;K06478;K06478;K06478
ENSMUSG00000042109	42	48	34	55	108	93	0.83	0.92	0.66	1.08	2.26	1.94	0.803333333333333	1.76	1.13150478312849	0.00174250677739437	0.0228016981393515	Csdc2	-	-	-
ENSMUSG00000062694	11	11	16	34	45	25	0.47	0.45	0.67	1.44	2.02	1.12	0.53	1.52666666666667	1.52632083281259	0.00176592563412607	0.0230169167247385	Cav3	Cellular Processes;Human Diseases;Cellular Processes;Human Diseases;Human Diseases	Transport and catabolism;Cancers;Cellular community - eukaryotes;Cardiovascular diseases;Infectious diseases	K12959;K12959;K12959;K12959;K12959
ENSMUSG00000033569	7	12	6	20	29	33	0.07	0.13	0.08	0.26	0.29	0.42	0.0933333333333333	0.323333333333333	1.79255792012952	0.00176722188540628	0.0230172050179267	Adgrb3	-	-	-
ENSMUSG00000062329	33	36	36	47	175	67	1.66	1.77	1.79	2.36	9.34	3.58	1.74	5.09333333333333	1.54952283146586	0.00177127123568692	0.0230533248362278	Cytl1	-	-	-
ENSMUSG00000020053	511	713	452	382	187	166	6.83	13.68	10.66	6.51	4.33	4.66	10.39	5.16666666666667	-1.00788993946377	0.00179982964550141	0.0233409350653144	Igf1	Human Diseases;Environmental Information Processing;Human Diseases;Environmental Information Processing;Environmental Information Processing;Environmental Information Processing;Human Diseases;Human Diseases;Cellular Processes;Environmental Information Processing;Human Diseases;Cellular Processes;Environmental Information Processing;Organismal Systems;Environmental Information Processing;Cellular…	Cancers;Signal transduction;Cancers;Signal transduction;Signal transduction;Signal transduction;Cardiovascular diseases;Cancers;Cellular community - eukaryotes;Signal transduction;Cancers;Cellular community - eukaryotes;Signal transduction;Sensory system;Signal transduction;Cell growth and death;Signal transduction;Endocrine system;Cancers;Drug resistance;Endocrine system;Aging;Cardiovascular dis…	K05459;K05459;K05459;K05459;K05459;K05459;K05459;K05459;K05459;K05459;K05459;K05459;K05459;K05459;K05459;K05459;K05459;K05459;K05459;K05459;K05459;K05459;K05459;K05459;K05459;K05459;K05459;K05459;K05459;K05459;K05459
ENSMUSG00000054404	172	316	235	120	121	115	1.56	3.18	2.15	1.23	1.05	1.08	2.29666666666667	1.12	-1.03604274992553	0.00180281287439446	0.0233628512022496	Slfn5	-	-	-
ENSMUSG00000078439	2770	1466	897	3415	4044	2716	150.92	77.76	48.30	185.13	233.37	156.86	92.3266666666667	191.786666666667	1.05468311915814	0.00182664111774251	0.0235257166072074	Smim24	-	-	-
ENSMUSG00000032363	204	218	395	131	134	105	1.94	2.02	3.73	1.24	1.34	1.06	2.56333333333333	1.21333333333333	-1.07904514776313	0.00185995763449739	0.023796129367702	Adamts7	-	-	-
ENSMUSG00000002032	51	40	27	87	81	65	0.98	0.78	0.52	2.19	2.18	1.32	0.76	1.89666666666667	1.31939482814184	0.00189175601175286	0.0240431986945003	Tmem25	-	-	-
ENSMUSG00000031074	87	186	442	100	41	53	1.88	4.53	11.78	2.56	1.23	1.58	6.06333333333333	1.79	-1.76015154966607	0.00189751930963275	0.0240721111857554	Fgf3	Human Diseases;Environmental Information Processing;Environmental Information Processing;Environmental Information Processing;Environmental Information Processing;Cellular Processes;Human Diseases;Human Diseases;Human Diseases	Cancers;Signal transduction;Signal transduction;Signal transduction;Signal transduction;Cell motility;Cancers;Cancers;Cancers	K04358;K04358;K04358;K04358;K04358;K04358;K04358;K04358;K04358
ENSMUSG00000037032	111	93	117	126	297	187	1.97	1.85	2.74	3.63	9.21	4.21	2.18666666666667	5.68333333333333	1.37800401929345	0.00191074983108064	0.0242059577128132	Apbb1	Human Diseases	Neurodegenerative diseases	K04529
ENSMUSG00000000320	1261	1228	366	495	232	263	21.31	20.55	6.21	8.31	4.13	4.78	16.0233333333333	5.74	-1.48105166074105	0.00194360890203172	0.0245190606251417	Alox12	Metabolism;Organismal Systems;Organismal Systems;Metabolism;Human Diseases	Global and overview maps;Nervous system;Sensory system;Lipid metabolism;Drug resistance	K00458;K00458;K00458;K00458;K00458
ENSMUSG00000020081	86	92	55	74	266	228	1.87	1.95	1.18	1.60	6.13	5.26	1.66666666666667	4.33	1.37740143078579	0.00194531861721346	0.0245235037124642	Tacr2	Environmental Information Processing;Environmental Information Processing	Signaling molecules and interaction;Signal transduction	K04223;K04223
ENSMUSG00000032269	48	52	58	61	184	111	1.17	1.25	1.40	1.48	4.76	2.88	1.27333333333333	3.04	1.255461186129	0.00195219041697527	0.0245752536735828	Htr3a	Organismal Systems;Organismal Systems	Nervous system;Sensory system	K04819;K04819
ENSMUSG00000026950	43	205	57	37	8	14	0.53	1.84	0.41	0.20	0.07	0.12	0.926666666666667	0.13	-2.83353885386126	0.00196244218592788	0.0246705066727816	Neb	-	-	-
ENSMUSG00000051652	75	128	59	93	236	292	0.86	1.43	0.67	1.06	2.86	3.54	0.986666666666667	2.48666666666667	1.33357845462629	0.00196718633662221	0.0246748223946415	Lrrc3	-	-	-
ENSMUSG00000055629	466	712	1402	373	274	395	6.44	9.58	19.14	5.13	4.01	5.78	11.72	4.97333333333333	-1.23668753488817	0.00197608375449693	0.0246976213888416	B4galnt4	Metabolism;Metabolism	Global and overview maps;Glycan biosynthesis and metabolism	K09657;K09657
ENSMUSG00000041695	168	346	193	135	74	47	1.52	3.04	1.72	1.21	0.71	0.45	2.09333333333333	0.79	-1.40587749999337	0.00197690343361555	0.0246976213888416	Kcnj2	Organismal Systems;Organismal Systems;Organismal Systems;Organismal Systems	Endocrine system;Nervous system;Endocrine system;Digestive system	K04996;K04996;K04996;K04996
ENSMUSG00000074342	70	58	70	31	27	23	1.32	1.07	1.31	0.58	0.54	0.46	1.23333333333333	0.526666666666667	-1.2276007123392	0.00198315817293904	0.0247415417086628	I830077J02Rik	-	-	-
ENSMUSG00000070369	40	16	18	56	50	93	0.51	0.38	0.24	0.71	0.68	1.26	0.376666666666667	0.883333333333333	1.22966958703537	0.00200904212665916	0.0249482751950295	Itgad	Cellular Processes	Cell motility	K06594
ENSMUSG00000032318	9	9	6	13	41	36	0.26	0.23	0.16	0.41	1.15	1.01	0.216666666666667	0.856666666666667	1.98325673616542	0.00201336421585275	0.024956501814662	Isl2	-	-	-
ENSMUSG00000042595	286	539	355	245	113	157	1.69	3.11	2.08	1.44	0.71	0.98	2.29333333333333	1.04333333333333	-1.13624590776948	0.00201914109792549	0.024956501814662	Fam199x	-	-	-
ENSMUSG00000071317	53	56	43	62	116	126	0.60	0.61	0.48	0.69	1.38	1.50	0.563333333333333	1.19	1.07890082774692	0.00201972907019296	0.024956501814662	Bves	Cellular Processes	Cellular community - eukaryotes	K21108
ENSMUSG00000032679	124	101	106	117	329	223	3.60	2.85	3.04	3.35	10.11	6.85	3.16333333333333	6.77	1.09771024727504	0.00202687698217773	0.0249935376676046	Cd59a	Organismal Systems;Organismal Systems	Immune system;Immune system	K04008;K04008
ENSMUSG00000073940	580	600	3887	226	268	164	40.55	40.85	268.47	15.73	19.83	12.14	116.623333333333	15.9	-2.87475779301497	0.00203892006623898	0.0250717932769162	Hbb-bt	Human Diseases;Human Diseases	Infectious diseases;Infectious diseases	K13823;K13823
ENSMUSG00000064061	65	173	115	59	31	26	0.72	1.98	1.35	0.71	0.35	0.23	1.35	0.43	-1.65055084234873	0.00204310003307621	0.025090823995596	Dzip3	-	-	-
ENSMUSG00000074785	128	156	107	72	50	24	0.86	1.02	0.71	0.48	0.36	0.17	0.863333333333333	0.336666666666667	-1.35859680493476	0.00204788425045403	0.0251017261121343	Plxnc1	Organismal Systems	Development	K06572
ENSMUSG00000026676	1448	4234	3668	1625	970	1332	26.64	75.89	66.70	29.75	18.89	25.97	56.41	24.87	-1.18154442938796	0.00205515442341809	0.0251193265622786	Ccdc3	-	-	-
ENSMUSG00000025189	26	18	15	55	34	51	0.25	0.17	0.14	0.53	0.35	0.53	0.186666666666667	0.47	1.33219643034119	0.00208991037346358	0.025364734552276	Cnnm1	-	-	-
ENSMUSG00000003226	1792	2900	1910	1526	682	918	9.16	14.44	9.65	7.76	3.69	4.97	11.0833333333333	5.47333333333333	-1.01790021349811	0.00210493397547651	0.0255205585684451	Ranbp2	Genetic Information Processing	Translation	K12172
ENSMUSG00000058818	273	340	344	224	121	102	3.51	4.25	4.36	2.86	1.64	1.39	4.04	1.96333333333333	-1.04105015964249	0.00215374845097834	0.0259210298247327	Pirb	Organismal Systems;Organismal Systems	Immune system;Development	K06512;K06512
ENSMUSG00000047193	149	226	185	116	83	84	0.60	0.84	0.72	0.40	0.32	0.35	0.72	0.356666666666667	-1.01342051576232	0.00216277343686481	0.0260123183335304	Dync2h1	Cellular Processes;Human Diseases;Organismal Systems	Transport and catabolism;Infectious diseases;Excretory system	K10414;K10414;K10414
ENSMUSG00000031173	141	104	32	191	259	217	2.96	2.12	0.67	4.00	5.79	4.80	1.91666666666667	4.86333333333333	1.34334602208615	0.00217091837994739	0.0260582329127905	Otc	Metabolism;Metabolism;Metabolism	Global and overview maps;Global and overview maps;Amino acid metabolism	K00611;K00611;K00611
ENSMUSG00000074336	21	71	177	26	7	16	1.92	6.32	15.97	2.36	0.68	1.55	8.07	1.53	-2.39903702058513	0.00218388339748107	0.0261443694999971	Apoc4	-	-	-
ENSMUSG00000032940	64	79	148	40	30	36	1.62	1.40	3.18	0.87	0.58	0.86	2.06666666666667	0.77	-1.42437536385818	0.00222511557246494	0.0264278190773038	Rbm11	-	-	-
ENSMUSG00000028373	16	11	10	24	49	33	0.16	0.11	0.10	0.24	0.53	0.36	0.123333333333333	0.376666666666667	1.61072559678624	0.00222953910258678	0.0264455836429614	Astn2	-	-	-
ENSMUSG00000034652	224	235	233	147	114	66	2.37	2.42	2.44	1.55	1.28	0.74	2.41	1.19	-1.01807157292202	0.00224217619602484	0.0265605986761893	Cd300a	-	-	-
ENSMUSG00000020728	87	217	106	66	12	29	1.25	3.60	2.13	1.56	0.39	0.84	2.32666666666667	0.93	-1.32296191438047	0.00224584332031518	0.0265691942249468	Cep112	-	-	-
ENSMUSG00000029629	546	956	695	443	263	400	9.33	15.22	12.45	7.82	4.05	6.56	12.3333333333333	6.14333333333333	-1.00546919977296	0.00225763222965532	0.0266388806196756	Phf14	-	-	-
ENSMUSG00000029651	66	73	77	100	106	211	0.86	1.42	1.24	1.43	1.71	4.74	1.17333333333333	2.62666666666667	1.16262020081908	0.00235392747310474	0.0273835554925177	Mtus2	-	-	-
ENSMUSG00000027574	3	5	3	13	25	14	0.16	0.37	0.15	0.67	1.38	0.77	0.226666666666667	0.94	2.05208851114845	0.00236007822441939	0.0274346042679932	Nkain4	-	-	-
ENSMUSG00000044071	9	35	63	5	2	8	0.10	0.38	0.70	0.06	0.02	0.10	0.393333333333333	0.06	-2.71271804791953	0.00236422537972985	0.0274346042679932	Tafa2	-	-	-
ENSMUSG00000050640	51	129	195	54	25	33	0.81	2.69	4.41	0.86	0.78	0.88	2.63666666666667	0.84	-1.65025396097288	0.00237618807806907	0.0275165625835371	Tmem150c	-	-	-
ENSMUSG00000018865	50	51	39	56	144	101	1.19	1.15	1.03	1.33	3.23	2.63	1.12333333333333	2.39666666666667	1.09324317925745	0.00241395200451897	0.0277758235424427	Sult4a1	-	-	-
ENSMUSG00000048776	50	132	303	42	41	48	1.53	3.94	9.18	1.28	1.33	1.56	4.88333333333333	1.39	-1.81278137586495	0.00244677049463956	0.0280818989743733	Pthlh	Organismal Systems	Endocrine system	K22608
ENSMUSG00000031403	230	438	417	205	158	175	4.30	8.11	9.31	4.34	2.93	3.34	7.24	3.53666666666667	-1.0335994468896	0.00245786326695667	0.0281198859515973	Dkc1	Genetic Information Processing	Translation	K11131
ENSMUSG00000009646	13	20	9	35	32	41	0.59	0.88	0.40	1.57	1.53	2.00	0.623333333333333	1.7	1.44745897697122	0.00246298165461307	0.0281606098674589	Pla2g12b	Metabolism;Environmental Information Processing;Organismal Systems;Organismal Systems;Metabolism;Metabolism;Metabolism;Metabolism;Organismal Systems;Metabolism	Global and overview maps;Signal transduction;Circulatory system;Digestive system;Lipid metabolism;Lipid metabolism;Lipid metabolism;Lipid metabolism;Digestive system;Lipid metabolism	K01047;K01047;K01047;K01047;K01047;K01047;K01047;K01047;K01047;K01047
ENSMUSG00000079114	38	184	22	22	1	2	3.83	18.02	2.19	2.24	0.11	0.21	8.01333333333333	0.853333333333333	-3.23122118071119	0.0024657444683935	0.0281685158150204	Defa42	Human Diseases;Organismal Systems	Infectious diseases;Immune system	K05230;K05230
ENSMUSG00000069917	1474	1589	7946	600	763	423	130.67	137.29	696.45	52.92	71.62	39.72	321.47	54.7533333333333	-2.55366540718341	0.00247711470813839	0.0281835471572505	Hba-a2	Human Diseases;Human Diseases	Infectious diseases;Infectious diseases	K13822;K13822
ENSMUSG00000033508	333	617	343	265	95	157	10.57	19.09	10.77	8.37	3.19	5.28	13.4766666666667	5.61333333333333	-1.2635340652053	0.00247726553051267	0.0281835471572505	Asprv1	-	-	-
ENSMUSG00000054013	18	19	14	30	62	37	0.37	0.38	0.29	0.62	1.35	0.81	0.346666666666667	0.926666666666667	1.41850135458241	0.00251297324205818	0.0283883145202181	Tmem179	-	-	-
ENSMUSG00000039607	298	792	844	367	200	194	2.33	6.48	7.06	2.78	1.76	1.72	5.29	2.08666666666667	-1.34206756590256	0.00255896715341067	0.0288158281538062	Rbms3	-	-	-
ENSMUSG00000033987	138	518	802	223	90	111	0.48	1.81	2.86	0.79	0.33	0.41	1.71666666666667	0.51	-1.75104077937793	0.00256448405803023	0.0288158281538062	Dnah17	Human Diseases	Neurodegenerative diseases	K10408
ENSMUSG00000015224	49	25	25	67	84	62	1.18	0.59	0.60	1.61	2.14	1.58	0.79	1.77666666666667	1.16924847386092	0.00257027396363218	0.0288397510267176	Cyp2j9	Metabolism;Organismal Systems;Organismal Systems;Metabolism;Organismal Systems;Metabolism	Global and overview maps;Nervous system;Sensory system;Lipid metabolism;Endocrine system;Lipid metabolism	K07418;K07418;K07418;K07418;K07418;K07418
ENSMUSG00000026620	463	354	524	310	196	174	5.77	4.01	7.03	3.59	2.41	2.15	5.60333333333333	2.71666666666667	-1.04444776011772	0.00257324672358863	0.0288439522947381	Mark1	-	-	-
ENSMUSG00000060487	607	471	581	393	155	207	4.37	3.31	4.14	2.82	1.18	1.58	3.94	1.86	-1.08289300834835	0.0025754384196741	0.0288439522947381	Samd5	-	-	-
ENSMUSG00000074443	228	1579	110	90	17	14	26.71	180.36	12.75	10.53	2.10	1.74	73.2733333333333	4.79	-3.93519068684133	0.00257886254164075	0.0288483550606318	Defa22	Human Diseases;Organismal Systems	Infectious diseases;Immune system	K05230;K05230
ENSMUSG00000069919	1296	1407	7271	480	695	400	91.10	96.31	505.03	33.57	51.70	29.81	230.813333333333	38.36	-2.58905194070825	0.00257902537630337	0.0288483550606318	Hba-a1	Human Diseases;Human Diseases	Infectious diseases;Infectious diseases	K13822;K13822
ENSMUSG00000089945	84	124	39	35	6	16	0.89	1.15	0.36	0.55	0.04	0.16	0.8	0.25	-1.67807190511264	0.0025847888804649	0.0288923821005891	Pakap	-	-	-
ENSMUSG00000096844	21	28	70	2	6	12	2.97	3.86	9.76	0.28	0.90	1.80	5.53	0.993333333333334	-2.4769296504937	0.00258775943751748	0.0288923821005891	Igkv6-14	-	-	-
ENSMUSG00000043639	342	383	253	203	92	156	3.53	3.85	2.57	2.09	1.01	1.72	3.31666666666667	1.60666666666667	-1.04566337920105	0.00260508917445649	0.0290029182571902	Rbm20	-	-	-
ENSMUSG00000095200	354	161	96	96	33	14	44.80	19.85	11.98	12.12	4.42	1.88	25.5433333333333	6.14	-2.05663624427289	0.00263027105709513	0.0291687210843607	Ighv1-7	Environmental Information Processing;Human Diseases;Environmental Information Processing;Human Diseases;Human Diseases;Cellular Processes;Human Diseases;Human Diseases;Human Diseases;Environmental Information Processing;Environmental Information Processing;Human Diseases;Human Diseases;Human Diseases;Human Diseases;Organismal Systems;Human Diseases;Organismal Systems;Human Diseases;Organismal Sys…	Signal transduction;Infectious diseases;Signal transduction;Cancers;Infectious diseases;Transport and catabolism;Infectious diseases;Immune diseases;Infectious diseases;Signal transduction;Signal transduction;Immune diseases;Cardiovascular diseases;Immune diseases;Infectious diseases;Immune system;Immune diseases;Immune system;Cardiovascular diseases;Immune system;Immune system;Immune system;Infe…	K06856;K06856;K06856;K06856;K06856;K06856;K06856;K06856;K06856;K06856;K06856;K06856;K06856;K06856;K06856;K06856;K06856;K06856;K06856;K06856;K06856;K06856;K06856;K06856;K06856;K06856;K06856
ENSMUSG00000018907	39	86	209	42	17	23	0.79	1.70	4.19	0.85	0.36	0.49	2.22666666666667	0.566666666666667	-1.97431335633635	0.00263725890307557	0.029210350756628	Alox12e	Metabolism;Organismal Systems;Organismal Systems;Metabolism;Human Diseases	Global and overview maps;Nervous system;Sensory system;Lipid metabolism;Drug resistance	K00458;K00458;K00458;K00458;K00458
ENSMUSG00000017652	71	103	171	40	47	46	3.25	4.25	7.31	1.18	1.98	1.67	4.93666666666667	1.61	-1.61647654645308	0.00265362216604324	0.0293555936494618	Cd40	Human Diseases;Human Diseases;Environmental Information Processing;Human Diseases;Human Diseases;Environmental Information Processing;Human Diseases;Human Diseases;Human Diseases;Environmental Information Processing;Organismal Systems;Human Diseases;Human Diseases;Human Diseases;Organismal Systems;Human Diseases	Infectious diseases;Cancers;Signaling molecules and interaction;Immune diseases;Infectious diseases;Signal transduction;Cardiovascular diseases;Immune diseases;Immune diseases;Signaling molecules and interaction;Immune system;Immune diseases;Immune diseases;Infectious diseases;Immune system;Infectious diseases	K03160;K03160;K03160;K03160;K03160;K03160;K03160;K03160;K03160;K03160;K03160;K03160;K03160;K03160;K03160;K03160
ENSMUSG00000034560	332	639	534	292	108	225	2.79	5.26	4.43	2.44	0.96	2.00	4.16	1.8	-1.20858662181142	0.00265893447160755	0.029378379956936	Washc4	Cellular Processes	Transport and catabolism	K18465
ENSMUSG00000047904	49	32	40	58	117	76	1.30	0.76	0.91	1.63	2.98	2.02	0.99	2.21	1.15854593931182	0.0026866926419663	0.0295945747421471	Sstr2	Environmental Information Processing;Environmental Information Processing;Organismal Systems;Organismal Systems	Signaling molecules and interaction;Signal transduction;Endocrine system;Digestive system	K04218;K04218;K04218;K04218
ENSMUSG00000104769	5	37	3	0	0	1	0.67	4.85	0.40	0.00	0.00	0.14	1.97333333333333	0.0466666666666667	-5.40209844357134	0.00274259379265897	0.0300534276255933	Igkv8-34	-	-	-
ENSMUSG00000052305	3130	2911	18497	1038	1586	819	244.81	221.83	1430.10	80.76	131.31	67.89	632.246666666667	93.32	-2.76022931329141	0.00274390240230097	0.0300534276255933	Hbb-bs	Human Diseases;Human Diseases	Infectious diseases;Infectious diseases	K13823;K13823
ENSMUSG00000030069	6	7	10	0	0	0	0.20	0.24	0.33	0.00	0.00	0.00	0.256666666666667	0.001	-8.00375213486111	0.00274498508620143	0.0300534276255933	Prok2	-	-	-
ENSMUSG00000032491	142	223	255	101	113	89	5.81	8.73	10.90	4.04	4.80	3.79	8.48	4.21	-1.0102440314968	0.00275886046900286	0.030157494367498	Nradd	-	-	-
ENSMUSG00000028864	88	49	57	29	23	16	1.53	0.80	0.80	0.52	0.40	0.27	1.04333333333333	0.396666666666667	-1.39520108362467	0.00275919507019595	0.030157494367498	Hgf	Human Diseases;Environmental Information Processing;Environmental Information Processing;Environmental Information Processing;Environmental Information Processing;Human Diseases;Cellular Processes;Human Diseases;Human Diseases;Human Diseases;Human Diseases;Human Diseases;Human Diseases	Cancers;Signal transduction;Signal transduction;Signal transduction;Signal transduction;Cancers;Cellular community - eukaryotes;Cancers;Cancers;Infectious diseases;Drug resistance;Cancers;Cancers	K05460;K05460;K05460;K05460;K05460;K05460;K05460;K05460;K05460;K05460;K05460;K05460;K05460
ENSMUSG00000073771	81	147	211	76	46	44	2.46	4.34	6.32	2.38	1.65	1.41	4.37333333333333	1.81333333333333	-1.27008916336775	0.00280226591820584	0.0305325294405238	Btbd19	-	-	-
ENSMUSG00000052917	235	283	303	192	110	128	3.95	3.08	3.75	2.40	1.38	1.58	3.59333333333333	1.78666666666667	-1.00805227229473	0.00280871030991187	0.0305643444989581	Senp7	-	-	-
ENSMUSG00000024079	552	1123	616	433	258	383	6.29	12.46	6.93	4.91	3.11	4.62	8.56	4.21333333333333	-1.0226487389452	0.00281589522893523	0.0305704010280738	Eif2ak2	Human Diseases;Human Diseases;Human Diseases;Human Diseases;Human Diseases;Human Diseases;Human Diseases;Human Diseases;Cellular Processes;Human Diseases;Genetic Information Processing	Infectious diseases;Infectious diseases;Infectious diseases;Neurodegenerative diseases;Cancers;Infectious diseases;Infectious diseases;Infectious diseases;Cell growth and death;Infectious diseases;Folding, sorting and degradation	K16195;K16195;K16195;K16195;K16195;K16195;K16195;K16195;K16195;K16195;K16195
ENSMUSG00000028976	75	61	14	130	142	120	1.17	0.92	0.22	2.01	2.34	1.98	0.77	2.11	1.45431264801228	0.00287163631410561	0.0310341315138781	Slc2a5	Organismal Systems	Digestive system	K08143
ENSMUSG00000035954	198	352	434	181	123	153	1.16	2.04	2.60	1.04	0.75	0.95	1.93333333333333	0.913333333333333	-1.08187700705441	0.00287235360593436	0.0310341315138781	Dock4	Environmental Information Processing	Signal transduction	K17697
ENSMUSG00000093789	139	41	161	51	8	12	6.99	2.10	5.20	2.37	0.36	0.43	4.76333333333333	1.05333333333333	-2.17700945291872	0.00291837291441519	0.0314212571054279	Methig1	-	-	-
ENSMUSG00000025161	1206	2549	2217	1123	405	950	36.64	72.75	69.76	35.41	12.39	28.42	59.7166666666667	25.4066666666667	-1.23292653028593	0.00294605221426627	0.0316788293159049	Slc16a3	Human Diseases	Cancers	K08180
ENSMUSG00000037053	47	29	15	50	98	83	1.78	1.07	0.60	1.93	3.93	3.33	1.15	3.06333333333333	1.4134684996235	0.00301902601037922	0.0322523387803079	Azgp1	-	-	-
ENSMUSG00000022032	292	139	247	98	120	66	3.78	1.75	3.16	1.26	1.64	0.91	2.89666666666667	1.27	-1.18956517932108	0.00303050494446686	0.0323179741449837	Scara5	-	-	-
ENSMUSG00000055254	130	85	24	247	197	164	1.32	0.92	0.30	2.69	2.13	2.09	0.846666666666667	2.30333333333333	1.44385721361609	0.00303053685035164	0.0323179741449837	Ntrk2	Environmental Information Processing;Environmental Information Processing;Environmental Information Processing;Human Diseases;Organismal Systems	Signal transduction;Signal transduction;Signal transduction;Substance dependence;Nervous system	K04360;K04360;K04360;K04360;K04360
ENSMUSG00000027947	199	201	479	146	119	81	1.90	1.70	4.80	1.10	1.04	0.67	2.8	0.936666666666667	-1.5798191974452	0.00305822409566914	0.0325157165660983	Il6ra	Human Diseases;Environmental Information Processing;Environmental Information Processing;Human Diseases;Organismal Systems;Environmental Information Processing;Human Diseases;Organismal Systems;Environmental Information Processing;Environmental Information Processing;Human Diseases	Cancers;Signal transduction;Signaling molecules and interaction;Infectious diseases;Immune system;Signal transduction;Endocrine and metabolic diseases;Immune system;Signal transduction;Signaling molecules and interaction;Drug resistance	K05055;K05055;K05055;K05055;K05055;K05055;K05055;K05055;K05055;K05055;K05055
ENSMUSG00000022610	57	38	39	63	120	84	1.55	1.01	1.05	1.70	3.45	2.42	1.20333333333333	2.52333333333333	1.06829446309856	0.00308657257247584	0.032703186816291	Mapk12	Human Diseases;Human Diseases;Human Diseases;Environmental Information Processing;Human Diseases;Environmental Information Processing;Human Diseases;Human Diseases;Human Diseases;Organismal Systems;Organismal Systems;Human Diseases;Human Diseases;Human Diseases;Organismal Systems;Cellular Processes;Human Diseases;Human Diseases;Human Diseases;Human Diseases;Organismal Systems;Organismal Systems;O…	Infectious diseases;Infectious diseases;Infectious diseases;Signal transduction;Infectious disease: viral;Signal transduction;Infectious diseases;Infectious diseases;Infectious diseases;Immune system;Environmental adaptation;Infectious diseases;Cancers;Infectious diseases;Immune system;Cell growth and death;Infectious disease: bacterial;Infectious diseases;Cardiovascular diseases;Infectious disea…	K04441;K04441;K04441;K04441;K04441;K04441;K04441;K04441;K04441;K04441;K04441;K04441;K04441;K04441;K04441;K04441;K04441;K04441;K04441;K04441;K04441;K04441;K04441;K04441;K04441;K04441;K04441;K04441;K04441;K04441;K04441;K04441;K04441;K04441;K04441;K04441;K04441;K04441;K04441;K04441;K04441;K04441;K04441;K04441;K04441;K04441;K04441;K04441;K04441;K04441;K04441;K04441;K04441;K04441;K04441;K04441;K04441
ENSMUSG00000004127	103	193	201	92	66	65	3.05	3.10	5.38	1.94	1.54	1.50	3.84333333333333	1.66	-1.21117486558369	0.00310313494801446	0.0328209208640991	Trmt10a	-	-	-
ENSMUSG00000026822	1837	5579	2359	1024	179	391	98.62	291.80	125.18	54.70	10.17	22.25	171.866666666667	29.04	-2.56517640453211	0.00310597718896113	0.0328235594002999	Lcn2	Organismal Systems	Immune system	K21129
ENSMUSG00000045027	183	310	257	140	39	102	6.79	11.21	9.42	5.17	1.53	4.01	9.14	3.57	-1.35627009102897	0.00310718685903089	0.0328235594002999	Prss22	-	-	-
ENSMUSG00000027559	176	267	56	52	61	17	5.15	7.61	1.62	1.51	1.89	0.53	4.79333333333333	1.31	-1.87146245818069	0.00313431421311332	0.032936896173579	Car3	Metabolism;Metabolism	Global and overview maps;Energy metabolism	K01672;K01672
ENSMUSG00000086040	278	363	824	252	159	171	3.24	4.11	9.38	2.92	1.96	2.12	5.57666666666667	2.33333333333333	-1.25701061820603	0.00314222165334868	0.032936896173579	Wipf3	Human Diseases;Cellular Processes;Human Diseases	Infectious diseases;Transport and catabolism;Infectious disease: bacterial	K19475;K19475;K19475
ENSMUSG00000021725	104	164	115	69	63	50	1.82	2.84	1.87	1.14	1.10	0.89	2.17666666666667	1.04333333333333	-1.06092033461382	0.00314319088483134	0.032936896173579	Parp8	-	-	-
ENSMUSG00000006720	69	121	93	51	34	36	1.31	2.51	1.69	1.05	0.62	0.85	1.83666666666667	0.84	-1.12862858507124	0.00315257283817574	0.0329960766637571	Zfp184	Human Diseases	Infectious diseases	K09228
ENSMUSG00000035004	64	119	104	55	23	25	1.45	2.62	2.32	1.24	0.55	0.60	2.13	0.796666666666667	-1.41880531296625	0.00317037480359068	0.033105676778535	Igsf6	-	-	-
ENSMUSG00000000202	14	43	50	8	9	7	0.40	1.20	1.41	0.23	0.27	0.21	1.00333333333333	0.236666666666667	-2.08387255725501	0.00318348431053219	0.0331933595285698	Btbd17	-	-	-
ENSMUSG00000056648	128	50	23	187	181	166	2.97	1.02	0.42	4.85	4.88	3.70	1.47	4.47666666666667	1.60660874386992	0.00318509750961972	0.0331933595285698	Hoxb8	-	-	-
ENSMUSG00000033208	24	12	11	23	66	52	0.79	0.39	0.36	0.76	2.31	1.82	0.513333333333333	1.63	1.66690411425733	0.00331821068239996	0.0340394525710138	S100b	-	-	-
ENSMUSG00000025887	151	214	155	90	71	102	4.21	5.53	4.14	2.16	1.77	2.28	4.62666666666667	2.07	-1.16034239435778	0.00332975792718499	0.0340916229419521	Casp12	Human Diseases;Organismal Systems;Genetic Information Processing;Human Diseases;Cellular Processes;Human Diseases;Human Diseases	Neurodegenerative diseases;Immune system;Folding, sorting and degradation;Infectious diseases;Cell growth and death;Neurodegenerative diseases;Neurodegenerative diseases	K04741;K04741;K04741;K04741;K04741;K04741;K04741
ENSMUSG00000030790	155	190	99	86	46	56	5.48	6.54	3.46	3.02	1.72	2.10	5.16	2.28	-1.17833724125851	0.00333246851435702	0.0340916229419521	Adm	Environmental Information Processing;Organismal Systems	Signaling molecules and interaction;Circulatory system	K12333;K12333
ENSMUSG00000013089	2158	5192	8652	2422	2206	1819	26.78	62.51	106.50	29.78	28.86	24.10	65.2633333333333	27.58	-1.24265021829866	0.00333548742870124	0.034093692384926	Etv5	Human Diseases;Human Diseases	Cancers;Cancers	K15593;K15593
ENSMUSG00000022144	41	58	22	60	103	103	0.55	0.76	0.29	0.80	1.46	1.46	0.533333333333333	1.24	1.21723071622067	0.00336537655706659	0.034255042948727	Gdnf	-	-	-
ENSMUSG00000060314	27	34	40	11	5	12	0.36	0.42	0.53	0.14	0.07	0.16	0.436666666666667	0.123333333333333	-1.82396963590851	0.00339263399197807	0.0344701535799122	Zfp941	Human Diseases	Infectious diseases	K09228
ENSMUSG00000038174	233	378	251	192	110	116	1.35	2.18	1.63	1.16	0.69	0.70	1.72	0.85	-1.0168738185644	0.00340797704993353	0.0345633323320707	Fam126b	-	-	-
ENSMUSG00000032409	308	523	454	259	119	221	1.88	3.11	2.74	1.57	0.77	1.43	2.57666666666667	1.25666666666667	-1.03590389065618	0.00342239249557047	0.0346325097688441	Atr	Human Diseases;Human Diseases;Human Diseases;Cellular Processes;Cellular Processes;Cellular Processes;Cellular Processes;Genetic Information Processing	Infectious diseases;Infectious disease: viral;Infectious diseases;Cell growth and death;Cell growth and death;Cell growth and death;Cell growth and death;Replication and repair	K06640;K06640;K06640;K06640;K06640;K06640;K06640;K06640
ENSMUSG00000025089	73	73	52	62	232	162	1.04	0.90	0.78	0.88	3.61	2.08	0.906666666666667	2.19	1.27228671907199	0.0034239503153698	0.0346325097688441	Gfra1	-	-	-
ENSMUSG00000039278	99	77	55	88	252	155	2.22	1.68	1.22	1.96	5.98	3.68	1.70666666666667	3.87333333333333	1.18239435340452	0.0034446783040938	0.0347255098010349	Pcsk1n	-	-	-
ENSMUSG00000019971	106	183	75	65	21	33	0.65	1.09	0.46	0.39	0.13	0.21	0.733333333333333	0.243333333333333	-1.59153515464464	0.00344784343326454	0.0347335200728706	Cep290	-	-	-
ENSMUSG00000056596	68	98	97	96	259	161	2.02	2.84	2.85	2.84	8.14	5.07	2.57	5.35	1.05777053209463	0.00345384235044788	0.0347597003124462	Trnp1	-	-	-
ENSMUSG00000092008	30	16	17	32	97	47	0.90	0.47	0.50	0.96	3.09	1.49	0.623333333333333	1.84666666666667	1.56684770616156	0.00345825274353098	0.0347653510361086	Cyp2c69	Metabolism;Organismal Systems;Organismal Systems;Human Diseases;Metabolism;Metabolism;Metabolism;Metabolism	Global and overview maps;Nervous system;Sensory system;Cancers;Lipid metabolism;Metabolism of cofactors and vitamins;Lipid metabolism;Lipid metabolism	K07413;K07413;K07413;K07413;K07413;K07413;K07413;K07413
ENSMUSG00000041556	15	9	10	23	40	30	0.57	0.33	0.38	0.87	1.61	1.21	0.426666666666667	1.23	1.52747700606039	0.00352899546836088	0.0352534405871921	Fbxo2	Genetic Information Processing;Genetic Information Processing	Folding, sorting and degradation;Folding, sorting and degradation	K10099;K10099
ENSMUSG00000094662	771	2736	199	213	28	33	90.23	311.76	23.05	24.80	3.47	4.13	141.68	10.8	-3.71353289970108	0.00356555473641528	0.0354885654618964	Defa36	Human Diseases;Organismal Systems	Infectious diseases;Immune system	K05230;K05230
ENSMUSG00000026167	509	585	495	390	145	193	10.13	11.34	9.74	7.72	3.06	4.07	10.4033333333333	4.95	-1.07154542623108	0.00356958824714808	0.0354998235144721	Wnt10a	Human Diseases;Human Diseases;Human Diseases;Human Diseases;Human Diseases;Environmental Information Processing;Human Diseases;Environmental Information Processing;Environmental Information Processing;Human Diseases;Human Diseases;Cellular Processes;Organismal Systems;Human Diseases	Cancers;Infectious diseases;Neurodegenerative diseases;Cancers;Cancers;Signal transduction;Endocrine and metabolic diseases;Signal transduction;Signal transduction;Cancers;Cancers;Cellular community - eukaryotes;Endocrine system;Cancers	K01357;K01357;K01357;K01357;K01357;K01357;K01357;K01357;K01357;K01357;K01357;K01357;K01357;K01357
ENSMUSG00000053367	12	36	49	10	3	5	0.86	2.26	3.28	0.63	0.23	0.27	2.13333333333333	0.376666666666667	-2.50174913247217	0.00357061607117608	0.0354998235144721	Epp13	-	-	-
ENSMUSG00000071551	3020	1619	767	4135	3440	3285	101.54	52.34	25.37	131.40	122.55	119.52	59.75	124.49	1.05901924031355	0.00359988930166786	0.0357302816413862	Akr1c19	-	-	-
ENSMUSG00000094694	369	95	91	86	18	17	51.64	12.95	12.59	11.98	2.67	2.52	25.7266666666667	5.72333333333333	-2.16833700453912	0.00363604790152871	0.035913179519473	Ighv1-9	Environmental Information Processing;Human Diseases;Environmental Information Processing;Human Diseases;Human Diseases;Cellular Processes;Human Diseases;Human Diseases;Human Diseases;Environmental Information Processing;Environmental Information Processing;Human Diseases;Human Diseases;Human Diseases;Human Diseases;Organismal Systems;Human Diseases;Organismal Systems;Human Diseases;Organismal Sys…	Signal transduction;Infectious diseases;Signal transduction;Cancers;Infectious diseases;Transport and catabolism;Infectious diseases;Immune diseases;Infectious diseases;Signal transduction;Signal transduction;Immune diseases;Cardiovascular diseases;Immune diseases;Infectious diseases;Immune system;Immune diseases;Immune system;Cardiovascular diseases;Immune system;Immune system;Immune system;Infe…	K06856;K06856;K06856;K06856;K06856;K06856;K06856;K06856;K06856;K06856;K06856;K06856;K06856;K06856;K06856;K06856;K06856;K06856;K06856;K06856;K06856;K06856;K06856;K06856;K06856;K06856;K06856
ENSMUSG00000002012	46	49	35	53	124	89	1.47	1.53	1.11	1.79	4.21	3.04	1.37	3.01333333333333	1.1371843787335	0.00364525502431312	0.0359647908324503	Pnck	-	-	-
ENSMUSG00000041479	86	64	54	104	202	96	1.21	0.88	0.75	1.43	2.95	1.40	0.946666666666667	1.92666666666667	1.025178562996	0.00365209473246461	0.0359733322475317	Syt15	-	-	-
ENSMUSG00000034303	29	51	37	17	8	10	0.63	0.80	0.53	0.28	0.15	0.19	0.653333333333333	0.206666666666667	-1.66051353372833	0.0036827066935407	0.0361959175292779	Ccdc15	-	-	-
ENSMUSG00000031434	273	589	729	254	234	239	3.49	7.36	9.20	3.24	3.31	3.15	6.68333333333333	3.23333333333333	-1.04754558426779	0.00370496475444562	0.0363478346593318	Morc4	-	-	-
ENSMUSG00000048814	12	15	13	23	46	33	0.09	0.13	0.09	0.18	0.35	0.25	0.103333333333333	0.26	1.33120590847538	0.00371993331833713	0.0364230869353714	Lonrf2	-	-	-
ENSMUSG00000036362	131	145	131	90	58	44	2.55	2.74	2.52	1.74	1.19	0.91	2.60333333333333	1.28	-1.02421623742082	0.00373502556439006	0.0364917451707444	P2ry13	Environmental Information Processing	Signaling molecules and interaction	K08388
ENSMUSG00000039219	428	817	370	324	176	224	3.70	6.80	3.19	2.76	1.56	2.13	4.56333333333333	2.15	-1.08575138094728	0.00378124881089802	0.0367446260187588	Arid4b	-	-	-
ENSMUSG00000049350	14095	12402	20653	11535	4742	3461	1015.20	870.27	1470.34	826.65	361.53	264.18	1118.60333333333	484.12	-1.20826193327577	0.00383298648015028	0.0371474789505981	Zg16	-	-	-
ENSMUSG00000050071	427	640	441	349	137	207	24.49	35.71	24.95	19.85	8.23	12.47	28.3833333333333	13.5166666666667	-1.07030461546126	0.00384183692143132	0.0372085649904276	Bex1	-	-	-
ENSMUSG00000027419	16	42	41	41	113	94	0.17	0.43	0.42	0.42	1.24	1.04	0.34	0.9	1.40439025507934	0.00384610677915609	0.0372085649904276	Pcsk2	-	-	-
ENSMUSG00000022758	17	22	16	42	53	29	0.36	0.44	0.41	0.85	1.25	0.64	0.403333333333333	0.913333333333333	1.17916884568593	0.00386589918948947	0.0373063402019911	P2rx6	Environmental Information Processing;Environmental Information Processing	Signaling molecules and interaction;Signal transduction	K05221;K05221
ENSMUSG00000033207	88	102	49	80	254	202	1.27	1.46	0.70	1.15	3.87	3.13	1.14333333333333	2.71666666666667	1.24859148294563	0.00389186959453495	0.0374968662534794	Mamdc2	-	-	-
ENSMUSG00000022199	34	60	38	46	146	114	0.78	1.24	0.81	0.98	3.32	2.54	0.943333333333333	2.28	1.27319427205402	0.00389598425746441	0.0375165008587924	Slc22a17	-	-	-
ENSMUSG00000027399	102	118	73	50	8	5	2.54	2.86	1.80	1.24	0.21	0.13	2.4	0.526666666666667	-2.18807234815257	0.00392420584727301	0.0377277518014732	Il1a	Human Diseases;Environmental Information Processing;Human Diseases;Environmental Information Processing;Human Diseases;Organismal Systems;Human Diseases;Human Diseases;Human Diseases;Cellular Processes;Cellular Processes;Human Diseases;Human Diseases;Organismal Systems;Human Diseases;Human Diseases;Human Diseases;Human Diseases;Human Diseases;Human Diseases	Neurodegenerative diseases;Signaling molecules and interaction;Infectious diseases;Signal transduction;Immune diseases;Immune system;Infectious diseases;Infectious diseases;Infectious diseases;Cell growth and death;Cell growth and death;Cardiovascular diseases;Endocrine and metabolic diseases;Development;Endocrine and metabolic diseases;Immune diseases;Endocrine and metabolic diseases;Immune dise…	K04383;K04383;K04383;K04383;K04383;K04383;K04383;K04383;K04383;K04383;K04383;K04383;K04383;K04383;K04383;K04383;K04383;K04383;K04383;K04383
ENSMUSG00000026531	560	472	111	377	10508	2064	34.43	28.27	6.75	23.06	683.85	134.48	23.15	280.463333333333	3.59872807232181	0.0039297141628375	0.0377277518014732	Mptx1	-	-	-
ENSMUSG00000059401	181	362	614	185	155	121	2.10	4.05	7.34	2.15	1.93	1.48	4.49666666666667	1.85333333333333	-1.27873356022476	0.00393045274787559	0.0377277518014732	Mamld1	-	-	-
ENSMUSG00000024621	1827	1507	1845	1259	909	592	24.71	19.46	28.06	15.88	12.11	7.84	24.0766666666667	11.9433333333333	-1.01143012683043	0.00394277465986121	0.0378259289593164	Csf1r	Human Diseases;Environmental Information Processing;Human Diseases;Environmental Information Processing;Environmental Information Processing;Environmental Information Processing;Environmental Information Processing;Organismal Systems;Organismal Systems;Environmental Information Processing;Human Diseases	Cancers;Signal transduction;Cancers;Signaling molecules and interaction;Signal transduction;Signal transduction;Signal transduction;Immune system;Development;Signaling molecules and interaction;Cancers	K05090;K05090;K05090;K05090;K05090;K05090;K05090;K05090;K05090;K05090;K05090
ENSMUSG00000051242	83	187	158	64	69	32	1.33	2.93	2.51	1.02	1.17	0.55	2.25666666666667	0.913333333333333	-1.30497994061447	0.00395449166230319	0.0378627542002567	Pcdhb9	-	-	-
ENSMUSG00000022652	11	54	51	5	10	8	0.18	0.85	0.81	0.08	0.17	0.14	0.613333333333333	0.13	-2.23815973719476	0.00397335188902726	0.0379179090730467	Morc1	-	-	-
ENSMUSG00000020275	549	793	430	414	189	189	3.61	5.08	2.80	2.71	1.32	1.32	3.83	1.78333333333333	-1.10276800135761	0.0039820695313628	0.0379757157700304	Rel	Human Diseases;Environmental Information Processing;Human Diseases;Organismal Systems	Cancers;Signal transduction;Cancers;Immune system	K09254;K09254;K09254;K09254
ENSMUSG00000074447	121	1108	80	49	2	11	14.24	126.84	9.29	5.70	0.26	1.37	50.1233333333333	2.44333333333333	-4.35855975810955	0.00398569673455531	0.0379757157700304	Defa21	Human Diseases;Organismal Systems	Infectious diseases;Immune system	K05230;K05230
ENSMUSG00000041482	195	145	241	101	99	99	1.90	1.32	2.27	0.70	0.85	1.14	1.83	0.896666666666667	-1.02919997644857	0.00400897924357192	0.0380568628665931	Piezo2	-	-	-
ENSMUSG00000031298	55	119	191	49	21	46	0.59	1.28	1.99	0.97	0.24	0.51	1.28666666666667	0.573333333333333	-1.16619228256599	0.00408052117876128	0.0385940393163992	Adgrg2	-	-	-
ENSMUSG00000074437	3	31	1	0	0	0	0.29	2.92	0.10	0.00	0.00	0.00	1.10333333333333	0.001	-10.1076530009734	0.00408502263032373	0.0385961996949782	Defa29	Human Diseases;Organismal Systems	Infectious diseases;Immune system	K05230;K05230
ENSMUSG00000094818	476	2492	144	145	13	56	54.96	280.60	16.42	16.73	1.58	6.91	117.326666666667	8.40666666666667	-3.80285327444585	0.00410390827507517	0.0386783908068169	Defa32	Human Diseases;Organismal Systems	Infectious diseases;Immune system	K05230;K05230
ENSMUSG00000095180	35	55	54	21	10	18	1.93	2.95	2.94	1.15	0.58	1.05	2.60666666666667	0.926666666666667	-1.49208372458385	0.00410531373161813	0.0386783908068169	Rhox5	-	-	-
ENSMUSG00000044150	124	196	120	89	58	58	1.81	2.79	1.73	1.29	0.90	0.90	2.11	1.03	-1.03459866152397	0.00413758669105087	0.0388850351005693	Bclaf3	-	-	-
ENSMUSG00000028970	94	89	108	56	32	47	1.82	1.20	1.45	0.82	0.39	0.56	1.49	0.59	-1.33652547110032	0.00414172188678932	0.0388878408964912	Abcb1b	Human Diseases;Human Diseases;Organismal Systems;Environmental Information Processing	Cancers;Cancers;Digestive system;Membrane transport	K05658;K05658;K05658;K05658
ENSMUSG00000059897	92	171	87	66	22	35	2.25	3.58	2.55	1.26	0.38	0.61	2.79333333333333	0.75	-1.89702524248231	0.00419370778908591	0.0392131252823578	Zfp930	Human Diseases	Infectious diseases	K09228
ENSMUSG00000021091	2775	1296	2400	1214	1124	532	66.04	30.05	56.46	28.75	28.32	13.42	50.85	23.4966666666667	-1.11379166940163	0.00423445850441764	0.0394103518198375	Serpina3n	-	-	-
ENSMUSG00000053783	8	11	9	22	24	29	0.43	0.57	0.47	1.17	1.36	1.64	0.49	1.39	1.5042312286083	0.00433577928707642	0.0402496674311591	1700016K19Rik	-	-	-
ENSMUSG00000068874	11288	6759	2919	17277	14432	10177	323.90	188.93	82.78	493.29	438.38	309.46	198.536666666667	413.71	1.05921435458326	0.00435606083522292	0.0403343100913901	Selenbp1	Metabolism;Metabolism	Global and overview maps;Energy metabolism	K17285;K17285
ENSMUSG00000031551	72	230	138	57	46	62	2.27	7.03	4.30	1.78	1.52	2.07	4.53333333333333	1.79	-1.34061265815229	0.00437521017040573	0.0404080632558177	Ido1	Metabolism;Human Diseases;Metabolism	Global and overview maps;Infectious diseases;Amino acid metabolism	K00463;K00463;K00463
ENSMUSG00000032712	376	705	385	321	179	193	3.37	6.17	3.64	2.86	1.68	1.69	4.39333333333333	2.07666666666667	-1.08104630198405	0.0043977956483827	0.0405337644836906	Resf1	-	-	-
ENSMUSG00000029655	626	838	684	462	470	443	8.91	14.35	10.75	8.22	3.39	4.58	11.3366666666667	5.39666666666667	-1.07085602040528	0.00441666386579852	0.0406040879061833	N4bp2l2	-	-	-
ENSMUSG00000029377	418	246	408	98	229	125	4.97	2.85	4.80	1.16	2.88	1.58	4.20666666666667	1.87333333333333	-1.16706987476163	0.00445701514977017	0.0408089096201714	Ereg	Environmental Information Processing;Environmental Information Processing;Human Diseases;Environmental Information Processing	Signal transduction;Signal transduction;Cancers;Signal transduction	K09784;K09784;K09784;K09784
ENSMUSG00000068134	131	214	140	93	55	81	1.64	2.49	1.65	1.12	0.70	1.03	1.92666666666667	0.95	-1.02010757344858	0.00447510291636746	0.0409245171308797	Zfp120	Human Diseases	Infectious diseases	K09228
ENSMUSG00000026723	162	246	170	109	73	109	2.88	3.70	2.18	1.60	1.00	1.50	2.92	1.36666666666667	-1.09530696009572	0.00447980730404086	0.0409245171308797	Trdmt1	-	-	-
ENSMUSG00000028354	5	4	4	14	19	16	0.04	0.03	0.03	0.11	0.15	0.13	0.0333333333333333	0.13	1.96347412397489	0.00449785172797513	0.0410266492562802	Fmn2	Organismal Systems	Development	K02184
ENSMUSG00000033615	12	18	13	21	51	40	0.27	0.39	0.29	0.47	1.21	0.95	0.316666666666667	0.876666666666667	1.46906338096135	0.00450123547334334	0.0410266492562802	Cplx1	Organismal Systems	Nervous system	K15294
ENSMUSG00000037686	286	119	79	380	304	334	5.27	2.09	1.45	7.21	5.99	6.72	2.93666666666667	6.64	1.17700372314767	0.00464301182525472	0.0420853028716641	Aspg	-	-	-
ENSMUSG00000020330	179	435	276	147	104	151	2.26	5.35	3.44	1.85	1.39	2.02	3.68333333333333	1.75333333333333	-1.07091166498649	0.00468429637744067	0.0423532602895224	Hmmr	Environmental Information Processing	Signaling molecules and interaction	K06267
ENSMUSG00000025075	609	873	387	383	134	257	13.51	17.85	7.98	7.93	2.97	5.61	13.1133333333333	5.50333333333333	-1.25265683736527	0.00469097070621941	0.0423711929039269	Habp2	-	-	-
ENSMUSG00000076617	2350	919	2918	836	887	980	75.68	28.59	94.25	26.49	29.39	33.72	66.1733333333333	29.8666666666667	-1.14771372235215	0.00471823421306187	0.0424054652481185	Ighm	Environmental Information Processing;Human Diseases;Environmental Information Processing;Human Diseases;Human Diseases;Cellular Processes;Human Diseases;Human Diseases;Human Diseases;Environmental Information Processing;Environmental Information Processing;Human Diseases;Human Diseases;Human Diseases;Human Diseases;Organismal Systems;Human Diseases;Organismal Systems;Human Diseases;Organismal Sys…	Signal transduction;Infectious diseases;Signal transduction;Cancers;Infectious diseases;Transport and catabolism;Infectious diseases;Immune diseases;Infectious diseases;Signal transduction;Signal transduction;Immune diseases;Cardiovascular diseases;Immune diseases;Infectious diseases;Immune system;Immune diseases;Immune system;Cardiovascular diseases;Immune system;Immune system;Immune system;Infe…	K06856;K06856;K06856;K06856;K06856;K06856;K06856;K06856;K06856;K06856;K06856;K06856;K06856;K06856;K06856;K06856;K06856;K06856;K06856;K06856;K06856;K06856;K06856;K06856;K06856;K06856;K06856
ENSMUSG00000104713	116	449	133	97	61	72	1.66	6.36	2.08	1.29	0.95	1.01	3.36666666666667	1.08333333333333	-1.63584366972335	0.00471891608885399	0.0424054652481185	Gbp6	-	-	-
ENSMUSG00000050222	52	58	55	57	141	123	2.01	2.18	2.10	2.19	5.75	5.03	2.09666666666667	4.32333333333333	1.04404655737241	0.00472058625042714	0.0424054652481185	Il17d	Environmental Information Processing;Environmental Information Processing;Organismal Systems;Organismal Systems;Organismal Systems	Signaling molecules and interaction;Signal transduction;Immune system;Immune system;Immune system	K05492;K05492;K05492;K05492;K05492
ENSMUSG00000021539	64	318	619	97	56	112	3.76	18.18	35.91	5.66	3.48	6.97	19.2833333333333	5.37	-1.84436046528828	0.00474330495469796	0.0425209286672946	Lect2	-	-	-
ENSMUSG00000029510	52	84	81	39	20	28	0.99	1.56	1.52	0.74	0.40	0.56	1.35666666666667	0.566666666666667	-1.25949404812855	0.0047727399348958	0.0426618243067257	Gpc2	-	-	-
ENSMUSG00000048482	9	42	56	10	2	0	0.11	0.51	0.68	0.13	0.03	0.00	0.433333333333333	0.0533333333333333	-3.02236781302845	0.00483075173449784	0.0429182200221977	Bdnf	Environmental Information Processing;Environmental Information Processing;Environmental Information Processing;Human Diseases;Environmental Information Processing;Human Diseases;Organismal Systems;Human Diseases	Signal transduction;Signal transduction;Signal transduction;Neurodegenerative diseases;Signal transduction;Substance dependence;Nervous system;Substance dependence	K04355;K04355;K04355;K04355;K04355;K04355;K04355;K04355
ENSMUSG00000034872	43	30	32	48	76	77	0.60	0.41	0.44	0.67	1.12	1.14	0.483333333333333	0.976666666666667	1.01484776440731	0.00489091285307657	0.0432261940757476	Gipc3	-	-	-
ENSMUSG00000071658	4	19	17	25	63	38	0.13	0.57	0.50	0.75	2.01	1.21	0.4	1.32333333333333	1.72610460153444	0.00491460278667776	0.0434143273062756	Gng3	Human Diseases;Environmental Information Processing;Human Diseases;Environmental Information Processing;Human Diseases;Human Diseases;Human Diseases;Organismal Systems;Organismal Systems;Organismal Systems;Environmental Information Processing;Organismal Systems;Organismal Systems;Organismal Systems;Organismal Systems;Organismal Systems;Human Diseases;Organismal Systems	Cancers;Signal transduction;Infectious disease: viral;Signal transduction;Infectious diseases;Infectious diseases;Substance dependence;Immune system;Nervous system;Nervous system;Signal transduction;Nervous system;Endocrine system;Nervous system;Nervous system;Environmental adaptation;Substance dependence;Nervous system	K04540;K04540;K04540;K04540;K04540;K04540;K04540;K04540;K04540;K04540;K04540;K04540;K04540;K04540;K04540;K04540;K04540;K04540
ENSMUSG00000044550	17	21	9	26	56	40	0.78	1.10	0.39	1.14	3.06	1.87	0.756666666666667	2.02333333333333	1.41900421896476	0.00491957247396107	0.0434369876549886	Tceal3	-	-	-
ENSMUSG00000020774	259	1580	1257	322	99	141	8.82	53.12	41.04	11.19	3.51	4.99	34.3266666666667	6.56333333333333	-2.38682915889591	0.00492786775289306	0.0434677397246158	Aspa	Metabolism;Metabolism;Metabolism	Global and overview maps;Amino acid metabolism;Amino acid metabolism	K01437;K01437;K01437
ENSMUSG00000038555	21	38	30	42	79	61	0.54	0.94	0.76	1.07	2.13	1.65	0.746666666666667	1.61666666666667	1.11448601501689	0.00495142513890224	0.0436329244557409	Reep2	-	-	-
ENSMUSG00000045545	288	318	780	241	67	174	8.33	8.96	22.30	6.94	2.05	5.33	13.1966666666667	4.77333333333333	-1.46710457476584	0.00502620838150854	0.0440341679980367	Krt14	Human Diseases;Organismal Systems	Infectious diseases;Endocrine system	K07604;K07604
ENSMUSG00000095066	442	3023	156	185	25	50	51.14	340.41	17.84	21.22	3.11	6.16	136.463333333333	10.1633333333333	-3.74706780721708	0.00503047437327425	0.0440501791338824	Defa20	Human Diseases;Organismal Systems	Infectious diseases;Immune system	K05230;K05230
ENSMUSG00000024401	260	348	181	156	36	93	7.79	10.16	5.36	4.65	1.14	2.95	7.77	2.91333333333333	-1.41524381962827	0.00507469479777004	0.0442657467511906	Tnf	Human Diseases;Human Diseases;Human Diseases;Human Diseases;Human Diseases;Environmental Information Processing;Human Diseases;Human Diseases;Environmental Information Processing;Human Diseases;Human Diseases;Environmental Information Processing;Human Diseases;Human Diseases;Human Diseases;Human Diseases;Organismal Systems;Human Diseases;Organismal Systems;Human Diseases;Organismal Systems;Human …	Infectious diseases;Infectious diseases;Infectious diseases;Infectious diseases;Neurodegenerative diseases;Signaling molecules and interaction;Infectious diseases;Immune diseases;Signal transduction;Infectious disease: viral;Infectious diseases;Signal transduction;Immune diseases;Infectious diseases;Infectious diseases;Infectious diseases;Immune system;Infectious diseases;Immune system;Immune dis…	K03156;K03156;K03156;K03156;K03156;K03156;K03156;K03156;K03156;K03156;K03156;K03156;K03156;K03156;K03156;K03156;K03156;K03156;K03156;K03156;K03156;K03156;K03156;K03156;K03156;K03156;K03156;K03156;K03156;K03156;K03156;K03156;K03156;K03156;K03156;K03156;K03156;K03156;K03156;K03156;K03156;K03156;K03156;K03156;K03156;K03156;K03156;K03156;K03156;K03156;K03156;K03156;K03156;K03156;K03156;K03156;K03156;…
ENSMUSG00000044303	41	134	435	76	33	32	2.29	7.26	24.26	4.28	1.97	1.90	11.27	2.71666666666667	-2.05257805177494	0.00510870675411542	0.0444686924954751	Cdkn2a	-	-	-
ENSMUSG00000096649	87	19	1	5	0	0	12.18	2.59	0.14	0.71	0.00	0.00	4.97	0.236666666666667	-4.39231742277876	0.00513639208623115	0.0445739030692805	Ighv1-31	Environmental Information Processing;Human Diseases;Environmental Information Processing;Human Diseases;Human Diseases;Cellular Processes;Human Diseases;Human Diseases;Human Diseases;Environmental Information Processing;Environmental Information Processing;Human Diseases;Human Diseases;Human Diseases;Human Diseases;Organismal Systems;Human Diseases;Organismal Systems;Human Diseases;Organismal Sys…	Signal transduction;Infectious diseases;Signal transduction;Cancers;Infectious diseases;Transport and catabolism;Infectious diseases;Immune diseases;Infectious diseases;Signal transduction;Signal transduction;Immune diseases;Cardiovascular diseases;Immune diseases;Infectious diseases;Immune system;Immune diseases;Immune system;Cardiovascular diseases;Immune system;Immune system;Immune system;Infe…	K06856;K06856;K06856;K06856;K06856;K06856;K06856;K06856;K06856;K06856;K06856;K06856;K06856;K06856;K06856;K06856;K06856;K06856;K06856;K06856;K06856;K06856;K06856;K06856;K06856;K06856;K06856
ENSMUSG00000050447	16	72	122	23	15	8	0.22	0.99	2.26	0.32	0.22	0.12	1.15666666666667	0.22	-2.39439773321981	0.00513765379411531	0.0445739030692805	Lypd6	-	-	-
ENSMUSG00000015627	642	602	260	285	200	88	9.62	8.79	3.85	4.25	3.17	1.40	7.42	2.94	-1.33560303178444	0.00516364331184806	0.0446749120826318	Gata5	-	-	-
ENSMUSG00000030144	83	121	156	74	27	19	3.08	4.70	5.81	2.86	1.06	0.80	4.53	1.57333333333333	-1.52568669140555	0.00518038316268689	0.0447768525521237	Clec4d	Organismal Systems	Immune system	K10058
ENSMUSG00000032281	231	222	458	151	55	147	4.83	4.38	10.40	3.27	1.09	3.22	6.53666666666667	2.52666666666667	-1.37131978202106	0.00520914164426696	0.0449382201207332	Acsbg1	Metabolism;Organismal Systems;Organismal Systems;Metabolism;Metabolism;Metabolism	Global and overview maps;Endocrine system;Endocrine system;Global and overview maps;Lipid metabolism;Lipid metabolism	K15013;K15013;K15013;K15013;K15013;K15013
ENSMUSG00000028631	59	53	49	58	147	109	0.74	0.65	0.61	0.72	1.95	1.45	0.666666666666667	1.37333333333333	1.04264433740849	0.0052639797141994	0.0453259263760782	Kcnq4	Organismal Systems	Nervous system	K04929
ENSMUSG00000031144	88	59	72	76	228	143	1.76	1.09	1.35	1.68	4.58	2.87	1.4	3.04333333333333	1.1202255323181	0.00529958652707274	0.0455673634514846	Syp	-	-	-
ENSMUSG00000022686	1368	792	574	576	335	338	16.61	9.00	6.50	6.52	4.04	4.07	10.7033333333333	4.87666666666667	-1.13409289558728	0.00531908099662752	0.0457132246451362	B3gnt5	Metabolism;Metabolism	Global and overview maps;Glycan biosynthesis and metabolism	K03766;K03766
ENSMUSG00000029436	140	145	82	121	305	280	1.07	1.08	0.62	0.92	2.47	2.27	0.923333333333333	1.88666666666667	1.0309160767827	0.00539339939650508	0.0461543155366481	Mmp17	Organismal Systems	Endocrine system	K07997
ENSMUSG00000013974	34	30	36	15	9	8	1.12	0.96	1.17	0.49	0.31	0.28	1.08333333333333	0.36	-1.58940840575234	0.00545855228093431	0.0464785127921145	Mcemp1	-	-	-
ENSMUSG00000104445	31	8	23	49	53	52	0.78	0.19	0.58	1.24	1.42	1.39	0.516666666666667	1.35	1.38565369249775	0.00548832613183753	0.0466352829593815	Rhbg	-	-	-
ENSMUSG00000011148	88	82	91	42	50	32	2.43	2.21	2.49	1.16	1.46	0.94	2.37666666666667	1.18666666666667	-1.00202483547749	0.00552375669468368	0.046892229647303	Adssl1	Metabolism;Metabolism;Metabolism	Global and overview maps;Nucleotide metabolism;Amino acid metabolism	K01939;K01939;K01939
ENSMUSG00000040148	4	4	5	13	24	13	0.13	0.13	0.17	0.44	0.86	0.46	0.143333333333333	0.586666666666667	2.0331668639352	0.00554435026044671	0.0469787464610552	Hmx3	-	-	-
ENSMUSG00000047344	12	37	107	15	9	5	0.15	0.44	1.30	0.18	0.12	0.07	0.63	0.123333333333333	-2.35278905859213	0.00562211427350345	0.0474595767994578	Lancl3	-	-	-
ENSMUSG00000055228	36	0	5	0	0	0	1.08	0.00	0.14	0.00	0.00	0.00	0.406666666666667	0.001	-8.66770293172909	0.00569588906695138	0.0479032756026428	Zfp935	Human Diseases	Infectious diseases	K09228
ENSMUSG00000028360	195	319	325	154	60	148	2.38	3.79	3.92	1.87	0.77	1.90	3.36333333333333	1.51333333333333	-1.15216197181544	0.00572734934905629	0.048055999066745	Slc44a5	Human Diseases	Cancers	K15377
ENSMUSG00000032719	313	888	776	417	185	209	5.60	15.46	13.71	7.42	3.50	3.96	11.59	4.96	-1.2244685406196	0.00578333272329207	0.0483946133995282	Sbspon	-	-	-
ENSMUSG00000024254	210	124	53	68	18	19	3.81	1.95	0.99	1.13	0.29	0.34	2.25	0.586666666666667	-1.9393120733009	0.00582716604358846	0.0486000713653858	Abcg8	Organismal Systems;Environmental Information Processing;Organismal Systems;Organismal Systems	Digestive system;Membrane transport;Digestive system;Digestive system	K05684;K05684;K05684;K05684
ENSMUSG00000005338	159	95	113	142	353	195	2.01	1.24	1.55	1.94	4.94	2.83	1.6	3.23666666666667	1.01643688981068	0.00583810966462833	0.0486688745230784	Cadm3	Environmental Information Processing	Signaling molecules and interaction	K06780
ENSMUSG00000017204	864	1061	478	495	110	289	15.57	18.63	8.51	8.88	2.10	5.52	14.2366666666667	5.5	-1.37210787350897	0.00587355840131835	0.048874174352748	Gsdma	-	-	-
ENSMUSG00000040809	21	36	127	23	4	7	0.67	1.12	4.01	0.73	0.14	0.24	1.93333333333333	0.37	-2.38549322366483	0.005885780928827	0.0489533298707457	Chil3	-	-	-
ENSMUSG00000024276	454	803	583	445	209	247	5.49	8.91	6.14	4.77	2.33	2.85	6.84666666666667	3.31666666666667	-1.04566775088718	0.00594788848050536	0.0492657521322005	Zfp397	-	-	-
ENSMUSG00000019232	82	59	42	26	13	26	1.62	1.11	1.02	0.51	0.20	0.58	1.25	0.43	-1.53951952995999	0.0059532933587094	0.0492879214138796	Etnppl	Metabolism;Metabolism	Global and overview maps;Lipid metabolism	K14286;K14286
ENSMUSG00000035818	92	300	569	114	83	117	2.26	7.16	14.13	2.47	2.09	2.72	7.85	2.42666666666667	-1.69371670430145	0.00599436220801954	0.0495044922214597	Plekhs1	-	-	-
