# Supplementary material for: Phycocyanin Ameliorates Colitis-Associated Colorectal Cancer by Regulating the Gut Microbiota and the IL-17 Signaling Pathway
Source: Mar Drugs. 2022 Apr 9;20(4):260. doi: 10.3390/md20040260 (PMC9030732; doi:10.3390/md20040260)
Supplement: Supplementary file 1 [file marinedrugs-20-00260-s001.zip › Table S3. Spearman-V2.xlsx]

## Sheet: Table S3-Spearman rivesed
	mRNA2_Phylum.heatmap.corMatrix									mRNA2_Phylum.heatmap.pMatrix
	Bacteroidetes	Firmicutes	Proteobacteria	Epsilonbacteraeota	Deferribacteres	Cyanobacteria				Bacteroidetes	Firmicutes	Proteobacteria	Epsilonbacteraeota	Deferribacteres	Cyanobacteria
Agr2	0.786654	-0.854175	0.000560217	-0.627315	-0.768409	-0.543731			Agr2	0.0634193	0.030347	0.99916	0.18246	0.074241	0.264778
Muc2	0.856207	-0.764365	-0.0826246	-0.715468	-0.791703	-0.361871			Muc2	0.029528	0.0767442	0.876345	0.10992	0.0605626	0.480888
Cldn15	0.889821	-0.79244	-0.0511231	-0.617419	-0.767537	-0.443336			Cldn15	0.0175404	0.0601507	0.923382	0.191553	0.0747772	0.378564
Cdx2	0.733519	-0.661779	-0.0606088	-0.729587	-0.711329	-0.256954			Cdx2	0.0970565	0.152245	0.909198	0.0997978	0.112969	0.623052
Vdr	0.800281	-0.834132	0.0379847	-0.473965	-0.69303	-0.595029			Vdr	0.0558486	0.0389867	0.94305	0.342289	0.126883	0.212795
Gjb3	0.847389	-0.684252	-0.165805	-0.533012	-0.772265	-0.450915			Gjb3	0.033158	0.133806	0.753571	0.276197	0.0718895	0.369469
Muc3a	0.868745	-0.728667	0.00821641	-0.525642	-0.680854	-0.442546			Muc3a	0.0247113	0.100445	0.987676	0.284154	0.136528	0.379517
Mmp13	-0.885192	0.7953	0.0373094	0.494544	0.692627	0.435687			Mmp13	0.0190148	0.0585645	0.944062	0.31866	0.127197	0.387821
Mmp10	-0.762509	0.885043	-0.200069	0.302418	0.521825	0.614128			Mmp10	0.0779055	0.0190631	0.7039	0.560202	0.288309	0.194618
Mmp14	-0.883416	0.778491	0.110287	0.584896	0.775498	0.43375			Mmp14	0.0195954	0.0681651	0.83524	0.222704	0.0699439	0.390178
Mmp9	-0.536768	0.92625	-0.402701	0.161138	0.393044	0.846127			Mmp9	0.272175	0.00795802	0.428601	0.760385	0.440793	0.0336938
Top1	-0.77927	0.759397	0.164887	0.689894	0.845933	0.460603			Top1	0.0677055	0.0798703	0.754911	0.129338	0.0337764	0.357956
Top2a	-0.718809	0.59336	0.32097	0.75032	0.903202	0.379755			Top2a	0.107486	0.214414	0.535079	0.0857275	0.0136013	0.45775
Dkk3	-0.732122	0.811749	0.0202774	0.569716	0.760635	0.603652			Dkk3	0.0980265	0.0498221	0.969588	0.237884	0.0790864	0.204506
Tmem176a	-0.502113	0.903607	-0.404427	0.14966	0.388027	0.871201			Tmem176a	0.310127	0.0134896	0.426433	0.777186	0.447171	0.0238153
Lamp2	-0.594043	0.873211	-0.225107	0.34092	0.564744	0.788915			Lamp2	0.21375	0.023094	0.668043	0.508432	0.242942	0.0621329
