# Supplementary material for: Phycocyanin Ameliorates Colitis-Associated Colorectal Cancer by Regulating the Gut Microbiota and the IL-17 Signaling Pathway
Source: Mar Drugs. 2022 Apr 9;20(4):260. doi: 10.3390/md20040260 (PMC9030732; doi:10.3390/md20040260)
Supplement: Supplementary file 1 [file marinedrugs-20-00260-s001.zip › Table S4. Primers list.xlsx]

## Sheet: Primers list
Gene	Forward primer	Reward primer
Gapdh	ACGGCCGCATCTTCTTGTGCA	ACGGCCAAATCCGTTCACACC
Cldn15	GGTGGCTATCTCGTGGTACG	GGGCCCAGTTCATACTTGGT
Gjb3	GCAAGGGCAAGTCCACAAAG	CTGCAGCTTTTCACTGGCTG
Muc3a	ATCGGGTCCCCAGTTAATGC	TGCCTGGGATTCGCAATCAT
Vdr	CATTGTCTCCCCAGACCGAC	CATCTTGGCGTAGAGCTGGT
Ifnγ	AGACAATCAGGCCATCAGCAA	TGTGGGTTGTTGACCTCAAACT
Tnfα	AGGGGATTATGGCTCAGGGT	CCACAGTCCAGGTCACTGTC
Il-6	TCTGCAAGAGACTTCCATCCAGTTGC	TCTGCAAGAGACTTCCATCCAGTTGC
Cox2	CATCCCCTTCCTGCGAAGTT	GGCCCTGGTGTAGTAGGAGA
Il-17a	CATGAGTCCAGGGAGAGCTT	ATCTATCAGGGTCTTCATTGCGG
Il-17f	CCATGGTCAAGTCTTTGCTACT	GGGTCTCGAGTGATGTTGTAATC
Mmp9	GCCGACTTTTGTGGTCTTCC	AGCGGTACAAGTATGCCTCTG
Mmp10	ATCCCTGTATGGAGCCGGT	TCAGGCTCGGGATTCCAATG
Mmp14	ATGGCCCCCTTTTACCAGTG	GTGACCCTGACTTGCTTCCATA
